# Supplementary material for: Optogenetic control of PRC1 reveals its role in chromosome alignment on the spindle by overlap length-dependent forces
Source: eLife. 2021 Jan 22;10:e61170. doi: 10.7554/eLife.61170 (PMC7924949; doi:10.7554/eLife.61170)
Supplement: Supplementary file 1. [file elife-61170-supp1.xlsx]

## Sheet: Figure 1
Figure 1C	Time (s)	Norm. PRC1 int. (a.u.)	Norm. PRC1 int. (a.u.)	Norm. PRC1 int. (a.u.)	Norm. PRC1 int. (a.u.)	Norm. PRC1 int. (a.u.)	Norm. PRC1 int. (a.u.)	Norm. PRC1 int. (a.u.)	Norm. PRC1 int. (a.u.)	Norm. PRC1 int. (a.u.)	Norm. PRC1 int. (a.u.)	Norm. PRC1 int. (a.u.)	Norm. PRC1 int. (a.u.)	Norm. PRC1 int. (a.u.)	Norm. PRC1 int. (a.u.)	Norm. PRC1 int. (a.u.)	PRC1 removal		PRC1 return		Figure 1D								PRC1 profile intensity t=0 min															PRC1 profile intensity t=5 min
N=15	0	1	1	1	1	1	1	1	1	1	1	1	1	1	1	1	Time (s)	Mean norm. PRC1 int. (a.u.)	Time (s)	Mean norm. PRC1 int. (a.u.)		N=14	Cyt. Int. (a.u.)	Cyt. Int. (a.u.)	Cyt. Int. (a.u.)	Cyt. Int. (a.u.)	Cyt. Int. (a.u.)	Cyt. Int. (a.u.)	Cyt. Int. (a.u.)	Cyt. Int. (a.u.)	Cyt. Int. (a.u.)	Cyt. Int. (a.u.)	Cyt. Int. (a.u.)	Cyt. Int. (a.u.)	Cyt. Int. (a.u.)	Cyt. Int. (a.u.)	N=14	Cyt. Int. (a.u.)	Cyt. Int. (a.u.)	Cyt. Int. (a.u.)	Cyt. Int. (a.u.)	Cyt. Int. (a.u.)	Cyt. Int. (a.u.)	Cyt. Int. (a.u.)	Cyt. Int. (a.u.)	Cyt. Int. (a.u.)	Cyt. Int. (a.u.)	Cyt. Int. (a.u.)	Cyt. Int. (a.u.)
	10	0.861188	0.880603	0.762153	0.787313	1.12629	0.943049	1.38397	1.05601	0.913472	1.20962	1.14502	1.20209	1.1291	0.939695	0.849457	0	1	0	0.117494			1278.33	1377.93	1233.01	1284.87	1215.11	1317.11	1350.62	1215.2	1253.32	1366.09	1233.15	1525.68	1272.3	1277.92		1282.2	1373.56	1270.41	1286.48	1227.63	1289.88	1295.54	1257.5	1272.09	1377.11	1254.17	1417.58
	20	0.83319	0.751567	0.882137	0.779419	1.06755	0.929269	1.1494	0.96399	0.850093	1.36604	1.16834	1.141	1.13889	0.857529	0.712379	10	1.0126	10	0.0809886		Pole-to-pole dist. (pixels)	Pole-to-pole PRC1 int. (a.u.)	Pole-to-pole PRC1 int. (a.u.)	Pole-to-pole PRC1 int. (a.u.)	Pole-to-pole PRC1 int. (a.u.)	Pole-to-pole PRC1 int. (a.u.)	Pole-to-pole PRC1 int. (a.u.)	Pole-to-pole PRC1 int. (a.u.)	Pole-to-pole PRC1 int. (a.u.)	Pole-to-pole PRC1 int. (a.u.)	Pole-to-pole PRC1 int. (a.u.)	Pole-to-pole PRC1 int. (a.u.)	Pole-to-pole PRC1 int. (a.u.)	Pole-to-pole PRC1 int. (a.u.)	Pole-to-pole PRC1 int. (a.u.)	Pole-to-pole dist. (pixels)	Pole-to-pole PRC1 int. (a.u.)	Pole-to-pole PRC1 int. (a.u.)	Pole-to-pole PRC1 int. (a.u.)	Pole-to-pole PRC1 int. (a.u.)	Pole-to-pole PRC1 int. (a.u.)	Pole-to-pole PRC1 int. (a.u.)	Pole-to-pole PRC1 int. (a.u.)	Pole-to-pole PRC1 int. (a.u.)	Pole-to-pole PRC1 int. (a.u.)	Pole-to-pole PRC1 int. (a.u.)	Pole-to-pole PRC1 int. (a.u.)	Pole-to-pole PRC1 int. (a.u.)
	30	0.743569	0.718785	0.856638	0.796054	1.10608	0.824466	1.2167	0.933551	0.778562	1.43485	1.03929	1.13277	1.16106	0.80703	0.634842	20	0.972719	20	0.172381		0	1344.62	1480.76	1285.86	1283.98	1229.25	1369.36	1365.34	1222.67	1319.85	1408.75	1266.82	1655.44	1327.08	1311.76	0	1294.57	1393.41	1274.4	1323.85	1226.41	1277.05	1303.76	1252.05	1288.35	1438.29	1295.01	1471.3
	40	0.666978	0.674065	0.734356	0.742596	1.07267	0.869579	1.34583	0.960427	0.817677	1.33587	0.987852	1.10311	1.18015	0.737271	0.592861	30	0.945616	30	0.196945		1	1322.61	1512.68	1247.87	1313.01	1241.77	1323.23	1371.67	1221.84	1321.41	1462.95	1253.12	1683.79	1319.55	1356.68	1	1288.33	1368.86	1279.72	1293.24	1223.23	1264.04	1298.07	1270.88	1292.53	1450.6	1312.93	1475.59
	50	0.554027	0.617859	0.708282	0.684111	1.0232	0.793412	1.32398	1.06514	0.794043	1.46483	0.958734	1.09764	1.28351	0.743962	0.564861	40	0.921419	40	0.296022		2	1346.54	1523.81	1266.17	1320.4	1230.52	1363.29	1381.28	1236.31	1336.61	1482.09	1254.17	1722.73	1324.47	1347.81	2	1287.11	1384.1	1290.28	1309.67	1240.59	1282.76	1295.91	1267.76	1313.12	1457.8	1306.81	1461.34
	60	0.570415	0.589632	0.848683	0.66452	1.05095	0.734113	1.22775	0.995746	0.749278	1.54532	0.972188	1.09086	1.25039	0.649176	0.592202	50	0.911839	50	0.357636		3	1353.38	1564.55	1280.56	1333.67	1240.4	1366.46	1395.91	1221.3	1318.99	1466.32	1258.34	1740.47	1313.27	1356.62	3	1298.46	1377.25	1282.69	1300.95	1232.11	1285.53	1280.71	1256.15	1319.43	1459.78	1302.44	1467.93
	70	0.597973	0.576209	0.855621	0.671707	1.0336	0.732911	1.27245	1.0716	0.744144	1.38861	0.882947	1.07841	1.24741	0.645454	0.618553	60	0.902082	60	0.393939		4	1346.21	1607.51	1264.49	1306.83	1236.37	1339.24	1422.05	1225.08	1336.69	1481.8	1275.82	1743.84	1333.57	1333.47	4	1310.77	1395.66	1283.67	1312.98	1223.2	1305.68	1295.73	1256.62	1318.42	1485.83	1311.73	1467.27
	80	0.549977	0.524586	0.805065	0.66217	1.03497	0.652971	1.2432	1.06554	0.709646	1.56311	0.894115	1.09182	1.23136	0.666617	0.508027	70	0.894507	70	0.45894		5	1379.54	1588.89	1248.37	1313.02	1234.99	1349.43	1418.65	1224.01	1349.24	1479.07	1293.52	1741.68	1312.07	1361.03	5	1308.32	1409.73	1270.04	1292.75	1224.28	1326.7	1309.67	1256.82	1334.42	1485.57	1314.32	1475.63
	90	0.500707	0.531588	1.15211	0.712234	1.01885	0.651084	1.27861	1.04426	0.631625	1.36969	0.846713	1.09897	1.37524	0.660547	0.60543	80	0.880213	80	0.520733		6	1399.28	1588	1253.89	1285.14	1249.14	1351.11	1429.55	1227.09	1349.61	1458.82	1291.16	1779.39	1323.16	1347.32	6	1298.87	1396.1	1286.02	1310.35	1218.64	1306.19	1316.43	1263.72	1333.4	1479.53	1324.55	1494.73
	100	0.484272	0.512378	1.00411	0.584502	1.0064	0.681914	1.17571	0.978202	0.650222	1.71086	0.937012	1.12529	1.30647	0.713823	0.48756	90	0.898511	90	0.505854		7	1385.75	1595.73	1279.27	1291.3	1244.06	1350.36	1458.33	1231.75	1347.88	1505.46	1283.15	1689.75	1320.54	1345	7	1293.3	1392.88	1282.81	1310.88	1239.65	1307.97	1315.23	1252.07	1339.77	1491.28	1314.27	1492.48
	110	0.470651	0.404541	0.926419	0.655451	1.02917	0.604237	1.0993	0.989221	0.743418	1.46277	0.912648	1.13997	1.41687	0.723961	0.588459	100	0.890582	100	0.534653		8	1389.94	1631.73	1275.48	1331.22	1250.05	1375.38	1447.09	1239.07	1345.02	1512.25	1291.52	1704.17	1355.49	1375.21	8	1303.27	1377.96	1272.73	1317.94	1227.21	1321.03	1317.76	1264.6	1312.39	1489.37	1301.23	1467.42
	120	0.526772	0.400155	1.21367	0.643346	0.958823	0.677218	0.95321	1.03625	0.64793	1.57799	0.956287	1.09781	1.24169	0.677267	0.526846	110	0.877805	110	0.555128		9	1383.83	1651.53	1261.66	1329.28	1226.99	1360.32	1508.64	1250.64	1385.86	1540.8	1282.54	1701.49	1331.33	1376.89	9	1298.55	1416.66	1274.33	1303.06	1215.11	1303.46	1305.22	1265.38	1331.4	1483.34	1324.5	1505.74
	130	0.497775	0.392825	0.982102	0.659592	0.970857	0.703367	0.950098	0.942285	0.49841	1.2882	0.865997	1.08932	1.31514	0.718307	0.503448	120	0.875684	120	0.572795		10	1416.47	1620.68	1263.55	1341.15	1241.18	1361.97	1521.91	1262.56	1364.21	1476.44	1265.82	1696.89	1374.69	1360.75	10	1301.71	1423.98	1275.66	1314.97	1231.33	1293.76	1312.9	1254.2	1343.65	1507.36	1328.27	1483.63
	140	0.449655	0.381542	0.74673	0.519327	0.991187	0.621693	0.979751	0.991454	0.43876	1.57055	0.959623	1.09362	1.26008	0.66733	0.422804	130	0.825182	130	0.618015		11	1413.22	1696.23	1266.76	1341.05	1238.77	1359.96	1508.65	1254.94	1385.27	1486.05	1307.35	1760.16	1339.82	1392.05	11	1298.16	1384.34	1284.33	1280.25	1233.87	1299	1312.86	1264.86	1340.21	1517.4	1321.42	1492.34
	150	0.441477	0.365216	1.00407	0.526724	1.03561	0.5705	0.951458	0.997783	0.521366	1.15078	0.873709	1.02974	1.34465	0.632056	0.415637	140	0.806274	140	0.600084		12	1422.43	1698.06	1297.91	1351.38	1253.01	1367.98	1583.86	1225.31	1336.94	1507.22	1300.67	1768.31	1352.35	1374.32	12	1295.43	1376.53	1308.2	1289.57	1227.39	1295.84	1322.17	1254.57	1348.07	1524.55	1315.1	1486.65
	160	0.406169	0.311231	0.789022	0.502165	0.97665	0.523486	0.837259	0.98872	0.535653	1.07987	0.850984	1.03639	1.37936	0.682616	0.369724	150	0.790718	150	0.624199		13	1420.99	1679.6	1292.04	1344.94	1243.86	1368.83	1531.71	1228.12	1372.93	1485.81	1297.27	1736.23	1349.82	1372.48	13	1317.88	1411.81	1308.8	1309.77	1223.06	1312.3	1318.55	1252.31	1320.6	1555.21	1332.39	1527.43
	170	0.388972	0.321323	1.08215	0.417917	0.996225	0.533213	0.881947	0.948794	0.53717	1.33548	0.781835	1.00538	1.31351	0.641361	0.350128	160	0.751287	160	0.635783		14	1429.3	1666.95	1261.17	1345.58	1232.04	1378.17	1537.89	1251.79	1339.51	1524.23	1291.67	1743.04	1325.23	1402.37	14	1308.39	1414.11	1319.69	1300.19	1218.97	1307.13	1311.86	1253.64	1354.09	1516.61	1355.87	1468.61
	180	0.4455	0.289385	0.894821	0.451057	0.975757	0.600925	0.687428	0.968748	0.371911	1.86461	0.792414	0.960671	1.4191	0.603776	0.354683	170	0.769028	170	0.647598		15	1452.83	1664.66	1285.42	1336.89	1233.39	1351.71	1631.64	1251.93	1359.28	1489.54	1312.49	1765.15	1355.54	1399.23	15	1294.29	1415.87	1307.22	1335.47	1216.14	1308.12	1326.67	1238.53	1353.29	1534.99	1327.01	1489.26
	190	0.38343	0.280143	0.927789	0.500503	0.937356	0.674605	0.526011	0.97593	0.406409	1.04494	0.735846	0.95502	1.27344	0.600939	0.325071	180	0.778718	180	0.624486		16	1419.18	1638.94	1294.66	1331.56	1229.29	1360.38	1583.75	1254.49	1361.83	1534	1327.06	1741.49	1332.57	1368.55	16	1297.28	1418.87	1311.8	1303.23	1220.47	1302.97	1328.48	1278.87	1349.51	1525.33	1310.65	1516.84
	200	0.3766	0.300256	0.637882	0.370143	0.933085	0.634145	0.743493	1.01128	0.313294	0.893795	0.715819	0.976868	1.24762	0.60941	0.301038	190	0.703162	190	0.641547		17	1437.19	1643.19	1295.52	1353.65	1220.33	1403.23	1543.36	1260.98	1360.14	1518.9	1326.5	1749.37	1348.76	1398.91	17	1294.15	1404.34	1316.39	1310.98	1213.29	1312.65	1320.43	1263.68	1355.76	1505.56	1329.95	1508.57
	210	0.380314	0.228961	0.747393	0.352463	0.909813	0.539041	0.606152	0.951731	0.350343	0.773079	0.706475	1.00638	1.13194	0.66305	0.308312	200	0.670982	200	0.675342		18	1432.59	1618.11	1278.78	1347.48	1225.87	1369.45	1582.84	1279.99	1357.09	1531.43	1313.06	1741.62	1359.77	1389.82	18	1288.88	1391.04	1319.32	1306.59	1222.93	1321.06	1338.26	1278.08	1380.74	1527.75	1311.38	1453.08
	220	0.333075	0.253143	0.228699	0.378655	0.898635	0.523402	0.574074	0.941725	0.391831	1.03102	0.712588	0.955108	1.12122	0.643042	0.229951	210	0.643696	210	0.643885		19	1431.22	1663.54	1286.34	1349.51	1221	1373.36	1547.09	1267.34	1357.65	1556.37	1293.97	1728.28	1333.43	1393.24	19	1297.91	1386.96	1327.03	1308.13	1231.29	1323.29	1326.99	1258.79	1377.22	1519.56	1320.69	1495.44
	230	0.377067	0.296308	0.414531	0.416294	0.854571	0.513815	0.591604	0.946699	0.30561	0.929362	0.592055	0.955778	1.07398	0.654676	0.273874	220	0.614411	220	0.629493		20	1447.68	1662.29	1312.16	1374.17	1229.04	1389.93	1558.63	1253.6	1333.77	1539.77	1309.93	1730.28	1346.01	1408.98	20	1313.2	1387.41	1324.58	1320.78	1224.47	1297.96	1328.81	1276.36	1380.91	1528.31	1316.43	1502.39
	240	0.359784	0.26742	0.338474	0.398415	0.835014	0.532654	0.333513	1.02112	0.337654	0.968962	0.571213	0.946333	1.10911	0.615853	0.270438	230	0.613082	230	0.628137		21	1432.38	1726.93	1291.3	1359.9	1228.91	1408.81	1573.32	1262.91	1346.99	1521.54	1332.78	1769.34	1329.01	1397.49	21	1303.07	1376.06	1327.27	1322.06	1236.27	1298.96	1364.62	1273.61	1403.65	1530.75	1299.07	1516.11
	250	0.308482	0.287928	0.586132	0.306004	0.843638	0.42943	0.481121	0.943151	0.280733	0.875743	0.553996	0.936635	0.971193	0.592559	0.279382	240	0.593731	240	0.659085		22	1440.99	1713.25	1280.62	1358.33	1236.66	1372.85	1523.35	1260.76	1336.78	1550.26	1326.39	1760.98	1352.89	1414.2	22	1299.08	1373.53	1326.64	1287.92	1237.38	1301.11	1329.17	1248.5	1404.61	1513.14	1304.28	1479.73
	260	0.295637	0.265694	0.177126	0.351906	0.881313	0.548097	0.308401	0.900007	0.271483	1.11899	0.531772	0.892008	0.744052	0.532347	0.203364	250	0.578409	250	0.659646		23	1431.35	1683.85	1316.46	1348.66	1228.18	1373.15	1563.53	1276.05	1337.14	1556.72	1344.74	1793.98	1363.1	1410.79	23	1293.43	1376.02	1317.59	1303.65	1247.87	1302.06	1351.36	1268.29	1410.17	1521.41	1321.48	1499.42
	270	0.29895	0.210442	0.580387	0.328561	0.805792	0.535924	0.443761	0.909096	0.193236	0.994645	0.626666	0.897886	1.1206	0.552061	0.186275	260	0.534813	260	0.650794		24	1419.27	1679.56	1323.26	1346.95	1248.06	1377.25	1524.79	1238.1	1351.97	1579.88	1338.57	1771.07	1354.14	1405.88	24	1301.9	1355.63	1323.44	1308.6	1238.36	1300.83	1342.16	1271.09	1424.42	1530.63	1305.94	1522.52
	280	0.297563	0.216694	0.543972	0.312236	0.861372	0.5486	0.411908	0.902968	0.270433	0.838967	0.652771	0.908473	0.902816	0.444061	0.167961	270	0.578952	270	0.643405		25	1421.26	1702.83	1333	1369.08	1232.61	1385.49	1544.05	1259.46	1364.52	1568.44	1321.45	1776.56	1355.68	1392.61	25	1303.55	1375.76	1330.73	1304.8	1227.04	1300.15	1330.68	1274.69	1418.6	1527.54	1297.21	1501.49
	290	0.304867	0.233081	0.495846	0.247775	0.88135	0.426803	0.357829	0.870228	0.176237	0.824747	0.640265	0.940567	0.923687	0.482673	0.233811	280	0.552053	280	0.667479		26	1418.33	1741.71	1332.62	1346.07	1222.92	1380.26	1536.64	1251.05	1359.02	1570.69	1311.82	1785.36	1352.06	1427.19	26	1302.97	1387.03	1332.03	1306.58	1238.42	1305.18	1327.37	1251.95	1424.81	1534.14	1298.14	1498.17
	300	0.257844	0.211472	0.303076	0.306243	0.838845	0.420094	0.260612	0.863923	0.381742	0.938337	0.653158	0.871677	0.773957	0.46613	0.100581	290	0.535984	290	0.660613		27	1432.4	1715.27	1349.66	1373.74	1233.71	1394.94	1528.93	1256.96	1384.2	1568.06	1313.16	1816.57	1345.59	1442.13	27	1330.76	1388.87	1340.49	1298.62	1236.17	1297.46	1344.45	1283.76	1442.83	1551.07	1309.14	1507.6
	310	0.222398	0.22146	0.344087	0.289293	0.80607	0.428759	0.0991269	0.826636	0.228235	0.946237	0.566796	0.863175	0.874425	0.460694	0.170339	300	0.509846	300	0.652781		28	1405.56	1753.24	1369.27	1359.06	1245.82	1396.76	1509.4	1266.73	1356.82	1611.16	1297.76	1774.08	1353.17	1431.15	28	1342.71	1385.83	1330.81	1289.7	1232.42	1289.31	1352.76	1269.88	1384.59	1520.15	1301.88	1499.39
	320	0.289438	0.186019	0.0881651	0.213421	0.78587	0.38099	0.140735	0.829285	0.196497	0.84801	0.612706	0.794097	0.958539	0.422596	0.172799	310	0.489849	310	0.685229		29	1430.66	1807.03	1341.77	1374.41	1251.66	1405.81	1532.11	1266.29	1367.85	1588.74	1295.15	1801.23	1341.61	1431.7	29	1316.97	1373.89	1311.52	1294.36	1229.27	1292.18	1346.73	1279.03	1375.91	1534.38	1283.9	1451.53
	330	0.26309	0.177711	0.275632	0.201293	0.727578	0.436012	0.207457	0.785082	0.214513	0.66006	0.629598	0.799159	0.882146	0.437182	0.119071	320	0.461278	320	0.659535		30	1453.76	1793.96	1356.19	1373.39	1228.16	1361	1540.41	1275.81	1379.16	1574.9	1306.5	1841.31	1356.27	1452.9	30	1317.45	1353.49	1321.57	1289.04	1234.05	1308.46	1343.29	1278.74	1348.24	1520.89	1294.21	1485.38
	340	0.244992	0.188632	0.243194	0.203947	0.686133	0.402806	0.229335	0.766195	0.124272	0.715944	0.571223	0.825889	0.78066	0.406252	0.180037	330	0.454372	330	0.676445		31	1433.52	1802.94	1358.06	1380.49	1242.38	1384.18	1526.86	1258.13	1387.2	1592.01	1324.49	1844.7	1356.9	1433.85	31	1322.34	1393.8	1298.04	1295.06	1243.42	1309.41	1320.32	1245.75	1348.1	1528.72	1275.03	1530.83
	350	0.245762	0.164959	0.296933	0.191305	0.654426	0.320126	0.312582	0.800601	0.225733	0.895259	0.651311	0.804497	0.760472	0.480117	0.0930911	340	0.437967	340	0.624641		32	1445	1842.38	1342.44	1371.93	1259.24	1390.18	1549.87	1261.85	1377.02	1594.82	1279.25	1831.16	1336.71	1439.09	32	1308.81	1393.82	1296.98	1299.94	1235.63	1295.05	1307.3	1269.04	1342.31	1501.89	1303.16	1497.73
	360	0.224173	0.147535	0.119807	0.0925197	0.649272	0.293587	0.22422	0.833844	0.253321	0.774934	0.559274	0.793369	0.741331	0.47315	0.12142	350	0.459812	350	0.686569		33	1451.78	1848.2	1344.02	1396.37	1258.79	1397.01	1519.22	1270.45	1370	1598.25	1300.28	1819.62	1354.23	1471.4	33	1297.34	1380.34	1324.91	1292.56	1232.11	1280.44	1338.03	1254.72	1319.04	1516.71	1300.57	1479.08
	370	0.219696	0.145378	-0.118835	0.160159	0.691167	0.26175	0.101926	0.806446	0.243442	0.879331	0.538713	0.743263	0.770807	0.413968	0.0960072	360	0.420117	360	0.674515		34	1418.53	1779.36	1338.44	1413.28	1246.13	1386.74	1535.3	1268.08	1394.66	1593.75	1312.82	1888.01	1385.34	1488.87	34	1313.25	1372.33	1320.98	1294.2	1228.85	1286.71	1333.93	1260.4	1330.33	1516.94	1311.58	1472.03
	380	0.199909	0.12926	0.296977	0.0973828	0.638197	0.307241	0.145978	0.783687	0.200936	0.785531	0.63829	0.739481	0.763837	0.462877	0.104387	370	0.396881	370	0.672418		35	1449.19	1862.02	1340.12	1400.58	1231.11	1407.96	1529.62	1270.81	1403.16	1603.62	1314.71	1907.07	1353.58	1478.02	35	1303.51	1375.81	1319.09	1269.83	1226.21	1278.65	1339.48	1255.24	1335.81	1509.6	1287.22	1462.61
	390	0.263833	0.094508	0.395307	0.0652582	0.661867	0.253183	0.198922	0.813486	0.223537	0.936363	0.569812	0.706739	0.667069	0.399568	0.082212	380	0.419598	380	0.611059		36	1466.63	1890.22	1354.72	1382.63	1235.77	1390.96	1542.39	1261.47	1442	1613.22	1312.57	1873.8	1366.54	1511.61	36	1297.56	1376.9	1320.27	1276.85	1231.35	1301.9	1341.98	1265.61	1353.69	1497.99	1300.11	1470.02
	400	0.240358	0.109241	0.159183	0.0746413	0.622689	0.197406	0.0541711	0.758888	0.184696	0.629337	0.666824	0.692175	0.598692	0.35892	0.104887	390	0.422111	390	0.632747		37	1495.26	1904.84	1347.84	1358.92	1246.13	1386.56	1576.31	1266.09	1426.67	1616.36	1318.61	1838.23	1365.35	1484.46	37	1311.05	1401.78	1323.45	1308.9	1239.67	1293.8	1327.3	1273.85	1363.69	1522.85	1277.51	1450.68
	410	0.1543	0.0988829	0.115211	0.162005	0.613693	0.306011	0.170781	0.740366	0.20627	0.834406	0.518951	0.597954	0.661814	0.364004	0.0757726	400	0.363474	400	0.641375		38	1480.37	1985.96	1353.98	1374.85	1248.61	1390.3	1552.27	1253.78	1427.37	1612.72	1291.14	1814.43	1355.58	1495.68	38	1305.26	1414.23	1308.27	1295.82	1233.85	1309.22	1300.23	1272.38	1351.33	1533.54	1305.64	1482
	420	0.204787	0.126407	0.250265	0.0982707	0.635701	0.18146	0.173063	0.827715	0.353792	0.733445	0.550493	0.674753	0.672752	0.316148	0.0259836	410	0.374695	410	0.689004		39	1495.03	2084.55	1344.05	1385.52	1256.19	1369.03	1530.19	1263.57	1437.74	1622.07	1314.61	1800.24	1342.45	1482.77	39	1323.85	1397.26	1322.02	1281.32	1230.42	1299.34	1332.61	1262.05	1361.8	1544.39	1311.27	1496.46
	430	0.155267	0.0837411	-0.0241736	0.0425167	0.60178	0.178357	0.191817	0.792036	0.269146	0.91716	0.47879	0.624033	0.731049	0.379629	0.00777247	420	0.388336	420	0.656616		40	1508.54	2042.63	1358.81	1367.49	1252.22	1384.39	1526.74	1266.39	1436	1604.19	1324.69	1805.46	1357.17	1530.16	40	1307.66	1397.9	1335.9	1297.49	1244.95	1281.77	1346.31	1255.46	1360.69	1519.05	1299.64	1485.73
	440	0.139457	0.0991521	-0.160509	0.0768206	0.555696	0.212556	0.00979645	0.682103	0.143573	0.743336	0.576222	0.663574	0.683838	0.299738	0.0600611	430	0.361928	430	0.687445		41	1507.39	2052.43	1351.55	1368.43	1237.63	1383.68	1566.64	1306.79	1454.77	1617.12	1311.22	1787.51	1363.34	1548.1	41	1309.04	1409.42	1329.48	1292.48	1251	1280.98	1336.42	1242.88	1395.19	1531.73	1312.4	1464.27
	450	0.157896	0.0742411	-0.161393	0.0848922	0.542572	0.252862	0.189965	0.66603	0.121869	0.640191	0.394396	0.633149	0.64168	0.271448	0.00948646	440	0.319028	440	0.635091		42	1512.16	2073.2	1352.48	1396.03	1244.51	1411.3	1542.7	1282.77	1472.03	1627.18	1311.45	1759.91	1366.05	1552.54	42	1325.98	1405.61	1316.83	1301.35	1266.52	1281.98	1339.13	1251.65	1408.1	1509.07	1310.69	1467.04
	460	0.169039	0.0865943	-0.0346473	0.043233	0.511332	0.221668	0.101388	0.64149	0.142046	0.6312	0.552638	0.647444	0.662216	0.243965	0.00953407	450	0.301286	450	0.651972		43	1555.26	2119.77	1361.41	1394.92	1247.25	1380.54	1561.22	1289.5	1470.05	1665.9	1293.22	1804.18	1363.68	1547.95	43	1314.7	1414.23	1313.43	1295.68	1253.97	1283.03	1315.34	1254.12	1395.31	1511.48	1308.88	1454.32
	470	0.13494	0.058701	-0.102926	0.0628468	0.443749	0.192207	0.0847877	0.547192	0.164824	0.65522	0.487051	0.647094	0.607579	0.288538	0.0462182	460	0.308609	460	0.662276		44	1514.86	2144.88	1343.02	1356.29	1245.67	1397.33	1584.69	1275.29	1461.97	1597.31	1306.87	1797.2	1348.83	1576.77	44	1310.04	1420.15	1313.14	1299.67	1258.55	1293.65	1328.59	1255.04	1389.77	1519.67	1296.55	1490.93
	480	0.191692	0.0984092	-0.12626	0.123464	0.379318	0.164969	0.168994	0.499421	0.220305	0.607565	0.505916	0.631925	0.574094	0.24742	0.0557166	470	0.287868	470	0.678177		45	1567.9	2126.72	1347.54	1384.57	1255.35	1387.62	1628.41	1287.27	1514.79	1632.23	1311.34	1792.41	1385.11	1574.47	45	1296.71	1419.72	1320.85	1307.01	1249.37	1282.35	1322.35	1261.39	1412.01	1533.18	1293.47	1502.68
	490	0.143822	0.0673216	-0.179645	0.0944904	0.374335	0.202619	0.193109	0.526991	0.0429147	0.616107	0.478937	0.615988	0.555448	0.289683	0.0109743	480	0.28953	480	0.651502		46	1592.91	2200.74	1341.65	1397.7	1247.03	1422.82	1617.94	1285.29	1482.57	1649.44	1332.58	1823.63	1379.91	1582.24	46	1312.38	1399.49	1330.8	1316.6	1239.11	1273.32	1334.48	1246.72	1387.5	1503.06	1289.78	1501.03
	500	0.124179	0.0630113	-0.0439279	-0.0445642	0.298536	0.232247	0.0867901	0.519385	0.124249	0.595009	0.485269	0.634537	0.536347	0.325559	0.0409929	490	0.268873	490	0.654233		47	1542.28	2181.78	1336.13	1404.33	1247.25	1447.74	1637.29	1295.78	1525.7	1648.8	1326.19	1786.06	1373.83	1588.38	47	1314.83	1426.73	1329.5	1286.9	1239.28	1281.69	1326.77	1262.07	1394.64	1512.41	1296.94	1494.91
	510	0.176119	0.109327	0.198029	-0.0651777	0.279284	0.157953	0.123974	0.490894	0.118934	0.68669	0.40419	0.634067	0.501213	0.26874	-0.0206631	500	0.265175	500	0.661327		48	1594.19	2189.58	1329.55	1398.91	1265.67	1419.76	1664.29	1290.72	1553.91	1672.38	1307.71	1807.95	1363.31	1627.23	48	1318.78	1431.99	1317.92	1276.53	1235.09	1287.95	1339.07	1269.67	1379.19	1525.67	1287.44	1484.25
	520	0.133895	0.0911667	0.23546	0.0489901	0.266172	0.16543	0.110883	0.496264	0.127257	0.520733	0.350917	0.59859	0.475825	0.278234	0.0456945	510	0.270905	510	0.642152		49	1586.7	2195.22	1327.02	1383.74	1248.93	1413.23	1683.69	1296.05	1549.42	1663.98	1309.57	1820.59	1358.46	1614.41	49	1317.86	1426.88	1332.33	1293.12	1245.78	1282.36	1343.72	1267.7	1402.92	1549.05	1304.49	1475.69
	530	0.173581	0.105792	-0.204977	-0.0652184	0.28154	0.12961	0.118612	0.499908	0.0841582	0.633769	0.419169	0.617723	0.506883	0.318578	-0.00030947	520	0.263034	520	0.682461		50	1620.1	2270.1	1366.65	1382.95	1259.71	1413	1706.84	1301.19	1563.11	1657.57	1296.63	1779.27	1368.28	1661.24	50	1324.68	1452.3	1323.96	1298.04	1247.78	1277.89	1344.8	1246.59	1419.2	1530.85	1307.22	1473.79
	540	0.142757	0.0798256	-0.241945	0.0347255	0.195568	0.107668	0.12617	0.500665	0.103694	0.435282	0.282785	0.583558	0.574939	0.331917	0.0354939	530	0.241255	530	0.639143		51	1680	2362.08	1346.33	1403.55	1262.53	1422.64	1688.03	1301.68	1627.21	1682.6	1324.97	1778.47	1378.67	1677.13	51	1327.99	1415.02	1332.5	1284.14	1247.67	1293.5	1342.57	1247.05	1421.67	1555.96	1305.93	1477.78
	550	0.12999	0.0754829	-0.147617	-0.0235234	0.144667	0.151915	0.0961775	0.486136	0.0133691	0.291901	0.381268	0.561609	0.513653	0.32104	0.05236	540	0.21954	540	0.662261		52	1684.69	2311.4	1351.27	1398.6	1265.28	1421.35	1682.59	1302.16	1630.95	1690.16	1313	1830.13	1380.42	1704.34	52	1337.97	1382.21	1327.06	1309.41	1241.76	1285.78	1360.32	1245.72	1427.94	1534.32	1310.4	1485.54
	560	0.122496	0.0752784	-0.0843224	0.0675687	0.136663	0.207399	-0.0419202	0.472836	0.00994323	0.404005	0.335167	0.556884	0.400249	0.270406	0.00849166	550	0.203228	550	0.640012		53	1652.99	2344.22	1376.61	1396.76	1258.13	1442	1714.38	1319.56	1653.35	1663.03	1302.32	1863.47	1383.39	1697.9	53	1317.4	1404.67	1329.46	1303.6	1236.07	1284.58	1348.96	1259.81	1448.51	1518.23	1326.76	1442.23
	570	0.133797	0.0257005	-0.126632	-0.08747	0.171981	0.0550082	0.0339323	0.49993	0.0386533	0.502076	0.275099	0.575773	0.469109	0.293688	0.04711	560	0.196076	560	0.569709		54	1683.9	2438.99	1370.62	1419.38	1251.07	1471.01	1697.6	1307.85	1669.08	1659.73	1331.8	1840.68	1378.83	1725.02	54	1331.11	1416.15	1337.18	1305.56	1252.15	1293.49	1320.23	1255.43	1482.32	1519.14	1312.98	1433.22
	580	0.131463	0.0405983	0.0155587	-0.029913	0.218998	0.19264	0.0962205	0.488665	0.111665	0.435314	0.392518	0.569053	0.535784	0.246586	0.0221316	570	0.19385	570	0.599197		55	1705.11	2413.78	1345.28	1398.39	1259.04	1459.29	1734.51	1327.64	1638.15	1688.86	1317.25	1813.09	1382.22	1765.89	55	1343.53	1438.89	1334.27	1330.74	1256.89	1290.48	1320.35	1250.7	1487.13	1533.77	1322.13	1447.51
	590	0.0841775	0.0192404	-0.116033	0.0245408	0.226767	0.179196	0.0291525	0.40928	0.0454715	0.418841	0.346026	0.564185	0.476146	0.19826	0.0120167	580	0.231152	580	0.594823		56	1710.35	2415.55	1385.66	1407.49	1243.93	1467.69	1773.66	1311.99	1632.4	1747.84	1327.39	1864.81	1389.59	1735.05	56	1346.83	1431.76	1331.8	1313.89	1249.04	1306.34	1335.36	1259.03	1518.38	1563.14	1332.71	1447.71
	600	0.134415	0.0414273	-0.14944	0.00791574	0.202692	0.0627926	0.136741	0.418377	0.0955887	0.339684	0.385555	0.532329	0.397287	0.14156	-0.0396843	590	0.194484	590	0.632166		57	1794.35	2464.46	1355.56	1387.6	1263.58	1466.59	1812.12	1311.3	1699.92	1716.63	1303.25	1853.28	1401.34	1773.65	57	1332.8	1439.39	1306.12	1304.26	1241.01	1312.35	1346.97	1256.03	1518.85	1566.39	1307.11	1438.13
	610	0.119729	0.0153105	-0.311175	-0.0302487	0.155861	0.100345	-0.118397	0.408725	0.139222	0.350859	0.39289	0.529329	0.405102	0.152604	0.053724	600	0.180483				58	1823.39	2522.01	1352.82	1400.04	1272.32	1454.17	1840.03	1341.75	1700.47	1737.19	1317.34	1897.82	1416.9	1781.79	58	1329.06	1474.33	1295.18	1305.96	1235.33	1314.79	1362.22	1250.56	1504.37	1537.62	1319.89	1439.48
	620	0.0513545	0.02471	-0.217186	-0.00734597	0.162022	0.21243	0.115017	0.347505	0.0641547	0.359947	0.355384	0.524804	0.410718	0.182633	-0.0190063	610	0.157592				59	1820.2	2544.5	1325.95	1408.81	1244.01	1471.62	1848.5	1331.45	1643.19	1771.19	1323.38	1887.45	1443.96	1729.75	59	1350.6	1477.33	1318.35	1317.91	1250.7	1301.29	1369.47	1245.3	1502.69	1552.42	1311.17	1445.59
	630	0.0984755	0.00845917	-0.230498	-0.0665004	0.185279	0.176638	0.0890508	0.349698	0.0328712	0.466752	0.341034	0.522469	0.350853	0.125275	-0.0452808	620	0.171143				60	1801.96	2569.36	1367.22	1418.63	1240.99	1501.37	1889.46	1363.07	1686.46	1739.29	1318.94	1867.36	1428.05	1795.87	60	1356	1480.27	1315.01	1341.66	1242.22	1318.46	1390.91	1246.93	1502.24	1580.21	1329.95	1464.89
	640	0.0205957	0.0186805	-0.173944	-0.0311339	0.152345	0.11481	-0.0255784	0.307365	-0.0222428	0.476193	0.344535	0.528548	0.360089	0.164679	-0.0967153	630	0.160305				61	1877.68	2559.42	1366.52	1417.09	1259.04	1484.28	1943.98	1371	1660.74	1753.97	1321.61	1897.51	1444.8	1852.75	61	1346.14	1511.62	1320.45	1329.17	1252.28	1323.56	1395.83	1239.26	1492.94	1576.39	1331.1	1454.6
	650	0.0755987	0.029372	-0.0355265	-0.0445642	0.144059	0.204436	0.0350734	0.252411	0.1435	0.363961	0.342548	0.495958	0.38037	0.154455	-0.0394784	640	0.142548				62	1923.47	2650.27	1350.88	1415.08	1270.69	1533.64	1974.13	1369.1	1614.06	1818.93	1321.28	1903.07	1450.27	1819.21	62	1359.5	1527.89	1320.73	1309.13	1241.52	1346.27	1396.07	1241.89	1494.91	1585.08	1338.75	1476.5
	660	0.103432	0.0298781	-0.0753348	-0.0610977	0.18594	0.284111	0.189922	0.213056	-0.00939176	0.312517	0.367073	0.513146	0.354204	0.171074	-0.0430277	650	0.166812				63	1975.22	2764.41	1348.81	1422.53	1263.67	1537.84	1962.97	1375.41	1647.62	1800.36	1321.7	1888.49	1454.86	1806.34	63	1357.43	1588.52	1330.8	1323.39	1248.76	1347.94	1437.51	1245.85	1523.64	1570.58	1362.38	1468.04
	670	0.058658	0.0407454	0.0837713	-0.0850078	0.191973	0.193423	0.148002	0.183502	0.054412	0.207478	0.417595	0.485764	0.402474	0.131256	-0.0270377	660	0.169033				64	1975.53	2709.5	1350.28	1421.2	1275.53	1522.78	2046.6	1394.95	1647.31	1832.94	1337.74	1880.36	1452.21	1834.32	64	1343.44	1608.17	1320.23	1300.62	1247.31	1346.19	1464.42	1248.84	1497.62	1567.88	1339.54	1485.53
	680	0.0528665	0.0159924	-0.0988637	-0.121483	0.168709	0.238467	0.028442	0.175675	-0.0271893	0.460876	0.341512	0.527013	0.279514	0.110557	0.082179	670	0.165801				65	1988.94	2703.16	1347.3	1409.4	1273.03	1532.63	2037.54	1360.13	1649.67	1872.64	1347.97	1980.35	1465.1	1873.77	65	1366.61	1621.46	1320.32	1306.77	1266.76	1360.53	1453.53	1242.42	1516.55	1590.73	1349.43	1448.93
	690	0.0938344	0.00209595	-0.118111	-0.0792185	0.167023	0.120065	0.0265385	0.172016	-0.0227775	0.418102	0.376463	0.479614	0.275184	0.0878439	0.0600473	680	0.148951				66	2018.1	2730.34	1385.74	1441.36	1264.67	1545.89	2091.34	1362.98	1624.93	1874.02	1347.23	2012.83	1451.19	1892.84	66	1404.63	1680.17	1320.54	1306.89	1246.29	1356.93	1495.34	1248.71	1497.74	1592.38	1372.98	1463.17
	700	0.089923	0.0364961	0.0238256	-0.0153329	0.143167	0.0632818	-0.0459689	0.190222	-0.00645057	0.445912	0.344637	0.482461	0.322918	0.0752631	-0.0426521	690	0.137248				67	2022.8	2781.27	1379.85	1458.18	1267.41	1560.17	2093.2	1373.74	1639.55	1866.14	1343.49	2044.66	1475.94	1886.39	67	1387.07	1678.89	1320.28	1315.17	1245.95	1389.68	1532.4	1258.06	1525.89	1604.46	1352.82	1457.88
	710	0.078649	0.0208067	-0.0970831	-0.00305234	0.126725	0.0938884	0.0587381	0.165699	-0.0475781	0.390743	0.351835	0.471249	0.220895	0.0530859	0.0284428	700	0.140513				68	2138.96	2774.2	1356.16	1429.66	1260.63	1552.37	2173.49	1398.06	1637.33	1900.02	1331.18	2057.33	1489.25	1950.55	68	1409.43	1754.83	1322.03	1323.59	1239.38	1382.17	1520.79	1251.04	1548.59	1625.35	1354.8	1447.29
	720	0.083908	0.0299298	-0.0182296	-0.0436892	0.183614	0.137409	-0.011471	0.172111	-0.0359772	0.446072	0.324564	0.431358	0.262811	0.105475	0.0647232	710	0.127536				69	2211.05	2753.43	1351.27	1416.62	1263.32	1545.05	2171.81	1409.61	1622.78	1879.26	1334.13	2003.15	1502.1	1938.17	69	1429.78	1762.45	1334.63	1325.31	1247.94	1384.36	1557.8	1235.25	1554.79	1638.58	1362.03	1441.63
	730	0.0698664	0.0307259	-0.118535	-0.0554102	0.154651	0.030439	0.0696131	0.150582	-0.12557	0.475808	0.373778	0.474089	0.252423	0.0215114	-0.066298	720	0.142174				70	2156.51	2770.58	1355.36	1432	1275.37	1609.05	2227.16	1407.25	1625.16	1861.97	1338.75	1965.74	1504.05	1918.86	70	1454.96	1784.64	1321.02	1317.81	1247.37	1375.72	1629.83	1249.45	1502.18	1663.39	1333.45	1478.17
	740	0.0473379	0.0022817	-0.289554	0.047118	0.146518	0.101421	-0.0227078	0.0817387	0.117966	0.345079	0.357978	0.465504	0.297771	0.0859154	0.0360987	730	0.115845				71	2224.4	2795.74	1360.19	1424.15	1284.2	1584.73	2218.39	1442.4	1593.64	1934.54	1357.3	1968.05	1503.04	1880.49	71	1461.2	1820.8	1315.48	1324.37	1246.15	1388.12	1657.64	1260.73	1528.31	1660.59	1363.18	1483
	750	0.00867742	0.0282644	0.0661776	-0.0110495	0.156072	0.0719606	-0.0684852	0.0815399	0.0966572	0.347359	0.382464	0.454515	0.299219	0.0430304	0.0585089	740	0.121364				72	2334.86	2776.75	1372.19	1432.67	1309.36	1585.25	2263.7	1437.55	1634.31	1929.18	1332.56	1955.04	1532.28	1891.16	72	1506.71	1846.33	1323.54	1349.65	1242.46	1376.64	1684.32	1268.83	1491.79	1668.47	1356.81	1456.65
	760	0.123193	0.0256562	-0.241266	-0.0403113	0.128559	0.0432686	0.115369	0.125879	0.0181599	0.36441	0.382549	0.431896	0.303816	0.0264473	0.0770186	750	0.134327				73	2360.68	2735.45	1364.43	1410.19	1301.26	1615.95	2250.09	1441.07	1597.49	1978.06	1334.7	1968.58	1521.13	1935.49	73	1567.59	1840.85	1328.31	1362.7	1262.01	1378.63	1729.7	1257.98	1512.48	1694.08	1345.23	1472.02
	770	-0.0578826	0.0323986	-0.330676	-0.0236557	0.10429	0.0371473	0.0697196	0.14313	0.0602068	0.381462	0.34171	0.437693	0.282624	0.0628888	-0.0219378	760	0.125643				74	2481.66	2759.61	1365.83	1471.33	1309.44	1618.88	2263.57	1474.84	1598.48	1956	1333.46	1969.33	1522.94	1928.1	74	1594.81	1880.95	1311.79	1362.14	1255.64	1355.53	1669.94	1254.36	1501.74	1721.24	1360.72	1486.49
	780	0.142729	0.0187891	-0.201331	0.0213969	0.116026	0.108814	0.115391	0.154304	0.00822337	0.475712	0.332297	0.434322	0.236163	0.0366864	0.0257173	770	0.101275				75	2533.38	2803.71	1386.03	1456.81	1307.52	1626.31	2308.95	1471.75	1615.63	1987.93	1349.43	1997.01	1517.77	1924.83	75	1577.63	1884.27	1328.87	1363.88	1252.41	1363.43	1677.03	1270.15	1497.49	1695.02	1342.64	1448.23
	790	0.0657799	0.0128905	-0.565286	-0.0286819	0.120803	0.108773	0.0201753	0.150188	-0.0900002	0.465147	0.260104	0.454601	0.247208	0.0358829	0.00317377	780	0.135016				76	2518.66	2804.47	1377.59	1469.06	1322.03	1638.37	2388.5	1439.12	1596.56	2026.04	1351.26	1968.19	1531.96	1932.12	76	1612.18	1953.54	1325.25	1364.11	1248.7	1377.74	1654.67	1278.19	1480.72	1753.17	1324	1470.75
	800	0.00789064	-0.0258507	-0.0410801	-0.0226077	0.12001	0.178078	0.223779	0.147421	0.0278028	0.369741	0.308387	0.436707	0.173563	0.0637918	-0.0858131	790	0.0840505				77	2575.6	2769.03	1389.4	1457.22	1322.67	1645.61	2372.49	1444.09	1584.81	2010.39	1355.34	1987.49	1521.01	1965.13	77	1688.08	1950.99	1340.23	1386.39	1253.18	1373.11	1674.42	1315.13	1493.58	1799.28	1326.4	1442.12
	810	0.102954	-0.00205426	-0.31109	-0.0628477	0.0735711	0.0963761	0.0872771	0.147931	0.0072444	0.405161	0.383276	0.428284	0.251471	0.012665	0.0128405	800	0.125455				78	2571.89	2767.33	1410.95	1483.9	1316.76	1658.98	2379.25	1458.54	1594.23	1968.21	1359.92	1984.2	1523.49	1897.52	78	1693.39	1940.36	1346.88	1397.09	1250.89	1373.57	1632.17	1308.71	1494.9	1779.28	1341.65	1434.15
	820	0.018845	-0.0133454	-0.330379	-0.0770411	0.0858315	0.144019	0.125414	0.158502	0.0243275	0.390807	0.282238	0.395773	0.273468	0.0378496	0.0682362	810	0.108871				79	2581.85	2809.14	1410.08	1463.43	1329.95	1664.74	2413.01	1445.2	1587.94	1971.97	1407.59	1959.74	1533.03	1859.91	79	1770.8	1978.89	1349.33	1375.14	1256.05	1355.81	1629	1310.09	1461.33	1816.09	1351.57	1431.15
	830	0.175237	0.0239872	-0.243852	-0.0535076	0.100022	0.130085	-0.0485228	0.147371	-0.0492462	0.454357	0.258432	0.419572	0.208	0.0459078	0.00907312	820	0.105636				80	2648.64	2800.39	1420.49	1468.71	1332.78	1660.09	2405.97	1441.25	1572.28	1993.82	1395.58	1949.94	1563.78	1866.73	80	1776.66	2034.38	1342.43	1361.32	1270.24	1362.45	1622.69	1306.26	1470.59	1862.92	1340.24	1438.38
	840	-0.0171355	-0.0180518	-0.329998	-0.130478	0.0952573	0.16216	0.0256234	0.146197	-0.150875	0.342157	0.321609	0.411398	0.200882	0.0200727	-0.0167411	830	0.105128				81	2659.7	2779.13	1453.31	1508.81	1331.12	1673.96	2441.65	1433.11	1598.45	2066.26	1398.35	2012.54	1578.04	1876.53	81	1799.77	2118.13	1358.31	1356.6	1274.52	1361.15	1597.09	1321.1	1462.33	1851.28	1344.48	1458.08
	850	-0.0190126	-0.00174979	-0.244658	-0.0993843	0.0942366	0.120219	0.0854256	0.12536	-0.0148834	0.283102	0.330507	0.382325	0.164944	0.00792807	-0.0659951	840	0.0708052				82	2635.93	2709.67	1415.53	1512.14	1322.06	1682.45	2434.4	1456.87	1611.14	2072.18	1408.3	1975.25	1605.49	1854.56	82	1784.04	2050.13	1344.93	1369.82	1284.33	1349.94	1560.29	1295.17	1478.9	1868.78	1321.06	1462.81
	860	0.148487	0.00145266	-0.189715	-0.0574248	0.0906952	0.090702	-0.0377541	0.114461	-0.0171233	0.423915	0.299143	0.413567	0.108082	-0.0108284	-0.00932751	850	0.0765575				83	2660.07	2712.43	1435.68	1495.77	1346.17	1651.44	2426.32	1466.3	1606.1	2035.55	1447.63	1995.93	1612.97	1812.63	83	1869.62	2075.72	1350.69	1376.33	1273.43	1344.14	1557.23	1281.58	1485.3	1963.26	1322.86	1463.35
	870	-0.00330508	-0.0033235	-0.25479	-0.0826269	0.0892407	0.144886	0.0184514	0.140082	-0.0690409	0.529628	0.326721	0.391255	0.151391	0.00536445	-0.0899802	860	0.0912221				84	2682.05	2710.36	1460.7	1493.51	1376.02	1674	2426	1438.1	1597.81	2012.32	1466.34	1975.48	1615.12	1799.41	84	1902.79	2111.37	1338.3	1376.38	1290.02	1329.91	1583.58	1261.65	1465.81	1983.79	1337.64	1434.21
	880	0.0584457	-0.0200547	-0.0390028	-0.0501297	0.0957986	0.112811	-0.104069	0.169131	-0.0291694	0.450536	0.282363	0.392088	0.191695	-0.0203329	-0.0666372	870	0.0862634				85	2627.57	2749.7	1483.24	1490.9	1379.7	1688.96	2377.75	1437.04	1578.37	2007.46	1471.72	1964.99	1619.46	1783.49	85	1914.88	2161.07	1340.08	1354.63	1318.42	1339.92	1588.22	1263.01	1427.75	1952.06	1352.78	1455.73
	890	0.0611072	-0.0300142	-0.116712	-0.118146	0.0582238	0.124188	-0.0443302	0.103869	-0.00846212	0.43008	0.223385	0.365655	0.193989	-0.0258198	-0.0308898	880	0.0948983				86	2707.98	2673.46	1449.24	1509.92	1370.84	1704.6	2417.12	1454.46	1549.63	2025.78	1458.54	2013.68	1601.41	1746.62	86	1891.99	2151.5	1368.94	1379.42	1320.7	1341.65	1595.53	1256.68	1450.94	1929.9	1369.26	1459.61
	900	0.0420275	-0.0322996	-0.264032	-0.123233	0.103278	0.0627647	-0.0937894	0.126674	-0.0437375	0.399252	0.235804	0.385003	0.243405	-0.0438339	0.00130827	890	0.0790749				87	2687.67	2649.31	1460.87	1525.55	1361.1	1718.25	2371.66	1432.06	1573.75	2013.67	1474.79	1977.63	1582.38	1729.94	87	2003.57	2128.59	1364.1	1374.86	1320.1	1373.07	1621.4	1260.39	1442.75	1984.88	1377.33	1466.44
	910	0.170939	-0.0250326	-0.632227	-0.03149	0.094092	0.127765	0.169681	0.0910499	-0.128707	0.314123	0.270814	0.344252	0.170953	-0.0527262	-0.0970182	900	0.0665728				88	2608.75	2662.63	1435.03	1534.83	1387.17	1704.68	2330.25	1421.35	1579.39	2047.21	1510.06	1993.66	1562.64	1703.73	88	1984.48	2149.61	1377.89	1375.18	1335.72	1372.93	1634	1259.79	1450.19	1976.23	1380.79	1458.79
	920	-0.0031576	-0.029607	-0.290189	-0.0171949	0.0643892	0.112937	-0.0398397	0.101311	-0.02532	0.383068	0.236938	0.389043	0.168579	-0.0458006	-0.0947893	910	0.0524311				89	2582.74	2637.63	1473.52	1536.53	1392.67	1691.36	2328.51	1440.64	1529.33	2050.25	1484.66	2039.66	1560.94	1686.34	89	1966.99	2150.55	1341.43	1381.43	1371.85	1381.63	1597.55	1274.91	1453.62	1992.54	1442.25	1447.82
	930	-0.0615899	-0.0401021	-0.236645	-0.0791371	0.0710008	0.0530935	0.0376477	0.1382	0.016842	0.30831	0.286319	0.405172	0.171059	0.0165908	-0.0173346	920	0.0606911				90	2577.12	2554.15	1455.02	1568.16	1425.05	1741.59	2317.71	1421.72	1502.94	2028.04	1512.02	2048.91	1558.39	1695.03	90	1998.97	2073.49	1364.94	1407.73	1414.1	1390.19	1580.41	1255.38	1416.82	2029.16	1408.12	1449.49
	940	0.131506	-0.0223308	-0.166144	-0.0702649	0.0261986	0.0346037	0.0489058	0.115149	-0.064904	0.279088	0.299216	0.400083	0.176907	-0.157061	0.0280552	930	0.071295				91	2444.01	2543.23	1500.77	1548.24	1466.05	1753.37	2257.1	1412.98	1493.8	2061.83	1496.65	2048.11	1566.54	1708.21	91	1993.05	2071.48	1350.86	1384.24	1403.04	1380.87	1614.97	1264.7	1411.37	1972.57	1410.85	1466.64
	950	0.0446555	-0.0346496	-0.266703	-0.0671922	0.00530585	0.150043	-0.100387	0.0995425	-0.0509816	0.210015	0.23324	0.394166	0.222185	0.0463516	0.000339182	940	0.0706006				92	2447.95	2555.41	1493.01	1569.32	1470.38	1774.16	2264.85	1400.68	1471.24	2092.7	1508.49	2023.11	1541.29	1686.71	92	1997.44	2025.39	1364.08	1385.2	1465.2	1394.55	1615.29	1272.98	1393.92	2001.05	1405.96	1472.91
	960	0.0448097	-0.0560032	-0.302314	-0.0784859	0.010591	0.114475	-0.0791262	0.107578	-0.0209934	0.271285	0.287608	0.365193	0.181403	-0.173568	-0.0749471	950	0.059062				93	2427.06	2609.33	1509	1578.26	1457.63	1734.03	2251.9	1433.15	1481.24	2065.59	1490.9	2012.1	1521.92	1659.66	93	1971.88	1943.96	1378.36	1415.69	1489.02	1408.19	1591.45	1251.78	1360.98	2020.52	1370.98	1473.17
	970	0.0147153	-0.0688669	8.47887e-05	-0.0702242	0.00229755	0.123	-0.0776151	0.102821	-0.0408393	0.373723	0.314368	0.340217	0.140515	-0.0275799	-0.0320285	960	0.0398336				94	2411.82	2585.31	1518.57	1588.48	1491.78	1733.41	2235.05	1420.75	1485.36	2009.73	1464.02	2020.88	1525.4	1592.44	94	1886.59	1963.65	1384.21	1435	1495.74	1388.8	1575.96	1260.42	1362.9	1947.27	1361.9	1490.91
	980	-0.0846383	0.00418862	-0.0401899	-0.0829785	-0.023149	0.102204	0.125095	0.100617	0.0152894	0.348386	0.268604	0.367668	0.155184	0.0428238	-0.0349842	970	0.0729726				95	2338.61	2517.7	1516.64	1585.1	1493.17	1786.07	2185.85	1381.02	1446.46	1998.41	1470.05	2012.06	1517.98	1594.96	95	1912.87	1904.64	1391.73	1433.11	1546	1365.33	1589.18	1254.57	1382.44	1940.03	1336.36	1489.39
	990	0.111736	-0.0163113	-0.02709	-0.111244	-0.0351037	-0.0199433	-0.0276878	0.107242	0.0138043	0.382425	0.300631	0.365258	0.161762	-0.150059	-0.0217561	980	0.0842746				96	2334.21	2514.13	1504.23	1586.7	1516.7	1754.3	2139.56	1387.99	1467.77	2042.58	1455.34	2079.32	1511.4	1584.21	96	1864.46	1885.31	1386.34	1439.07	1591	1363.78	1533.67	1247.61	1371.82	1942.19	1334.36	1483.62
	1000	0.0404923	-0.0673593	-0.0711801	-0.0601935	0.0167647	0.0661188	0.0189409	0.127065	-0.120189	0.167755	0.205427	0.36421	0.0574395	-0.0943486	-0.106758	990	0.0689109				97	2256.67	2467.4	1563.18	1588.13	1514.41	1761.19	2093.12	1407.19	1456.4	2054.37	1444.2	2070.97	1478.88	1574.7	97	1858.34	1840.92	1409.04	1434.26	1627.09	1376.03	1512.43	1265.03	1382.77	1942.09	1330.03	1476.47
	1010	0.0963972	-0.0128964	-0.416016	-0.136582	0.0166985	0.0843431	0.0204306	0.0983708	-0.155071	0.203078	0.305765	0.353428	0.154574	-0.125158	-0.073227	1000	0.036279				98	2264.65	2528.55	1584.49	1597.38	1570.61	1786.16	2033.35	1383.87	1432.88	2014.49	1421.04	2075.6	1465.72	1497.79	98	1811.78	1854.84	1443.34	1434.52	1657.27	1389.99	1459.73	1252.71	1377.16	1930.14	1317.7	1482.22
	1020	0.000663698	-0.0031351	-0.0960656	-0.0825071	-0.0214011	0.0148282	0.0931722	0.142492	-0.0315914	0.303237	0.214641	0.357339	0.101232	-0.00300746	-0.101864	1010	0.027609				99	2237.23	2467.85	1583.5	1585.61	1574.54	1770.11	2001.07	1379.15	1422.51	2031.94	1396.99	2036.15	1463.18	1514.89	99	1765.95	1740.14	1421.95	1472.86	1716.64	1378.72	1459.7	1255.69	1355.79	1929.41	1333.51	1494.48
	1030	-0.0948083	0.000984488	-0.0410801	-0.0466011	-0.0513518	0.00347994	0.0152166	0.133543	-0.0747257	0.358277	0.35351	0.348852	0.114216	0.0145016	0.0222891	1020	0.0592022				100	2255.06	2411.6	1579.24	1588.92	1632.31	1755.14	1960.51	1374.72	1421.75	2008.41	1397.32	1969.55	1479.64	1497.13	100	1697.32	1715.36	1426.16	1445.55	1738.29	1367	1422.42	1264.06	1340.52	1906.79	1363.97	1518.03
	1040	-0.138116	-0.0160824	-0.216423	-0.127606	0.00242151	0.0465809	0.0563758	0.154582	-0.0920064	0.225364	0.279527	0.326722	0.0262065	-0.00993304	0.00884296	1030	0.0704202				101	2226.85	2363.28	1599.79	1570.67	1681.28	1775.05	1914.37	1354.88	1438.25	1939.38	1384.54	1936.38	1497.32	1468.97	101	1717.78	1686.93	1424.91	1432.51	1829.42	1397.02	1437.07	1280.95	1324.8	1865.33	1387.34	1535.96
	1050	0.0109343	-0.0109238	-0.22893	-0.0247983	0.00102067	0.00388523	-0.0434151	0.136825	-0.12542	0.321252	0.230404	0.30561	0.1072	-0.128119	-0.0161111	1040	0.0350971				102	2184.58	2309.86	1637.36	1584.42	1694.19	1787.99	1906.61	1365.86	1429.19	1969.12	1398.87	1915.91	1473.52	1493.15	102	1659.88	1676.61	1431.75	1469.14	1830.29	1415.39	1385.91	1266.47	1333.3	1914.55	1383.3	1527.8
	1060	0.0262329	-0.0246304	-0.403934	-0.0663023	-0.0455129	0.0718349	-0.0670593	0.142609	-0.0354221	0.193509	0.271094	0.30112	0.119097	0.0404974	-0.0381459	1050	0.0359609				103	2085.49	2332.54	1598.21	1578.68	1717.97	1768.95	1871.55	1353.07	1425.95	1964.06	1392.78	1932.49	1460.43	1491.28	103	1627.85	1676.39	1447.93	1475.05	1884.42	1398.27	1350.94	1259.85	1343.1	1929.74	1369.99	1530.89
	1070	0.00754203	-0.00931449	-0.409021	-0.0566481	-0.0251077	0.0381116	-0.0218565	-0.00149122	-0.114384	0.366209	0.290392	0.298244	0.0530762	-0.0297947	-0.0875695	1060	0.0323324				104	2100.29	2340.73	1653.35	1558.97	1761.14	1787.33	1890.71	1366.55	1408.67	1938.72	1416.89	1924.05	1436.99	1456	104	1577.49	1614.95	1456.98	1482.13	1896.81	1399.43	1354.61	1257.1	1345.79	1983.95	1370.1	1523.31
	1080	-0.000475986	-0.0420932	-0.487238	-0.0423781	-0.00876869	0.0194681	0.0716562	-0.0220345	-0.0617145	0.13044	0.281104	0.309168	0.115012	-0.0332083	-0.0508167	1070	0.0198926				105	2021.28	2293.43	1649.51	1545.51	1765.28	1787.01	1835.3	1343.17	1388.77	1931.7	1403.01	1939.54	1422.69	1443.26	105	1527.01	1562.87	1480.99	1490.21	1887.88	1415.59	1366.06	1257.05	1339.83	1956.07	1348.13	1526
	1090	-0.0074951	0.00524939	-0.223291	-0.0960111	-0.0318144	0.0820371	-0.0570143	0.122513	-0.0826404	0.153625	0.212365	0.270344	0.0286734	-0.0331609	-0.00776485	1080	0.0118746				106	1986.97	2315.01	1714.53	1557.58	1811.22	1765.53	1812.26	1333.28	1401.75	1911.66	1365.28	1941.15	1419.41	1445.22	106	1528.45	1550.91	1505.25	1489.21	1910.48	1402.73	1344.85	1261.17	1325.2	1949.81	1361.41	1501.48
	1100	-0.0336609	-0.0139209	-0.309436	-0.103544	-0.0127026	0.0491524	0.108197	0.124142	-0.0093829	0.229764	0.290267	0.295478	0.0667232	-0.0384913	0.0407866	1090	0.0223743				107	1999.36	2273.51	1700.75	1577.02	1808.12	1770.36	1747.2	1323.04	1415.47	1880.27	1363.89	1909.47	1436.72	1436.04	107	1491.66	1483.52	1475.16	1467.85	1969.17	1402.43	1360.79	1272.2	1314.66	1954.4	1352.99	1503.52
	1110	0.0355313	-0.035616	0.043751	-0.0601542	-0.0611453	0.0130393	-0.0183876	0.104988	-0.376582	0.0332684	0.257378	0.281574	0.062214	-0.0981281	-0.0253296	1100	0.045558				108	1958.21	2211.46	1700.68	1592.71	1869.14	1767.18	1690.59	1333	1405.06	1854.86	1371.57	1853.43	1437.24	1430.67	108	1478.03	1512.98	1474.79	1446.9	2001.48	1387.09	1374.69	1260.61	1326.72	1972.32	1317.22	1491.84
	1120	0.00168271	0.00276456	-0.171273	-0.0991047	-0.0468352	0.0372172	0.0112581	0.118057	0.164167	0.268074	0.289648	0.308563	0.0711927	-0.0245524	-0.0928995	1110	0.0104268				109	1914.4	2156.07	1690.25	1575.67	1925.79	1758.15	1660.38	1316.76	1408.83	1828.98	1386.13	1865.13	1403.54	1430.09	109	1465.9	1478.56	1481.93	1459.43	2028.92	1402.74	1382.35	1274.81	1319.51	1916.68	1307.72	1486.91
	1130	0.0378844	-0.0205544	0.020858	-0.0807982	0.0372566	0.0570626	0.0573335	0.13131	-0.275597	0.315857	0.266888	0.305129	0.0962454	-0.0256428	-0.00402173	1120	0.055864				110	1889.79	2173.55	1705.07	1582.15	1918.98	1743.15	1684.88	1305.54	1394.58	1808.93	1376.73	1866.81	1409.12	1405.92	110	1443.45	1496.72	1468.7	1437.89	2041.34	1408.93	1348.54	1274.18	1327.86	1866.06	1303.08	1466.67
	1140	-0.0604033	-0.031075	-0.208835	-0.116851	0.0363723	0.00364765	0.134289	0.0968111	-0.0688361	0.263578	0.267934	0.28478	0.0363656	-0.082164	-0.0797926	1130	0.0612806				111	1881.87	2142.04	1735.62	1576.09	1907.15	1777.25	1619.07	1323.89	1366.83	1830.22	1379.15	1866.08	1400.99	1389.61	111	1434.8	1470.36	1447.9	1473.73	2074.69	1419.84	1364.48	1289.41	1332.78	1855.89	1300.62	1487.43
	1150	0.0532031	-0.000446834	-0.327624	-0.111862	0.0532361	0.0643998	0.0879369	0.0845014	-0.00511334	0.227676	0.227605	0.254561	0.0199732	-0.0346645	-0.000726819	1140	0.0317213				112	1883.34	2170.54	1740.76	1610.78	1937.98	1789.15	1599.69	1328.04	1360.32	1815.71	1368.32	1860.68	1388.55	1401.38	112	1408.28	1456.24	1453.85	1467.48	2084.85	1417.78	1369.26	1290.4	1325.24	1838.5	1289.3	1469.83
	1160	0.0281301	-0.0145094	-0.0458707	-0.0714878	0.0426658	0.0622895	0.00349023	0.141548	-0.0314563	0.0202308	0.234677	0.256146	-0.00819618	-0.0844601	-0.0089641	1150	0.0395104				113	1788.64	2160.56	1766.95	1595.03	1965.31	1816.56	1587.99	1305.57	1351.22	1822.3	1373.69	1842.55	1404.17	1386.59	113	1401.39	1403.71	1440.73	1470.62	2091.16	1409.16	1365.16	1288	1306.67	1838.22	1296.96	1443.98
	1170	0.0322128	0.0115014	-0.313549	-0.0310641	0.0115167	-0.0391877	-0.0344767	0.135733	0.0124543	0.299383	0.259234	0.262633	0.0572671	-0.112135	-0.00201087	1160	0.0349488				114	1803.83	2111.62	1754.3	1601.04	1978.7	1823.97	1589.66	1299.14	1367.17	1817.26	1356.07	1858.65	1386.85	1358.53	114	1386.36	1423.17	1442.37	1454.67	2101.74	1401.04	1349.38	1283.95	1319.94	1804.85	1283.1	1457.84
	1180	0.0541819	-0.0377012	-0.097507	-0.11474	0.0243185	-0.016058	0.0897671	0.219873	-0.0215503	0.1648	0.227988	0.227108	0.071007	-0.0157745	-0.0307565	1170	0.0366341				115	1753.33	2056.67	1767.75	1596.57	2039.84	1808.15	1568.21	1289.23	1380.63	1802.12	1347.76	1864.55	1382.97	1381.07	115	1388.79	1407.08	1467.75	1431.52	2056.91	1390.38	1332.6	1259.64	1323.06	1775.9	1281.15	1466.83
	1190	0.0302217	0.00884586	-0.3651	-0.139214	0.0101365	0.19721	0.105963	0.213034	0.0110536	0.230984	0.224305	0.253312	-0.0463389	-0.0254599	-0.0261897	1180	0.0496638				116	1773.97	2020.54	1776.48	1570.95	2098.06	1791.03	1561.83	1291.91	1367.59	1793.27	1352.11	1847.85	1398.13	1386.34	116	1375.74	1406.28	1453.94	1436.07	2039.97	1393.45	1360.58	1256.66	1354.71	1778.7	1298.7	1455.35
	1200					0.0518884	0.0765447	0.0730608	0.220715	0.0252967	0.418969	0.251689	0.204227	0.011472	-0.0139457	-0.0274859	1190	0.0455176				117	1714.63	2033.59	1735.23	1606.37	2031.99	1814.92	1547.2	1286.87	1352.86	1755.73	1361	1846.77	1401.19	1385.83	117	1342.58	1423.75	1449.45	1413.82	1988.01	1381.62	1340.84	1274.07	1321.99	1677.36	1307.95	1449.09
	1210					0.111265	0.0507736	0.0865323	0.194561	0.023491	0.0239879	0.305294	0.209502	-0.00287795	-0.0885781	-0.0230765						118	1708.94	1976.44	1757.43	1617.38	2017.67	1788.64	1564.16	1286.23	1344.37	1740.99	1351.13	1875.39	1378.58	1381.18	118	1349.07	1401.74	1459.63	1416.45	1917.42	1366.38	1341.62	1269.08	1330.76	1661.45	1317.41	1459.7
	1220					0.192389	0.0783615	0.249743	0.201947	0.153822	0.436214	0.326097	0.26407	0.0389119	-0.0345833	-0.0107811						119	1666.63	1985.86	1742.54	1597.22	2016.3	1779.26	1557.47	1295.32	1339.65	1753.71	1356.77	1885.04	1359.87	1365.07	119	1367.95	1371	1415.23	1421.1	1909.24	1350.68	1362.19	1266.15	1327.17	1678.7	1314.54	1470.51
	1230					0.291471	0.0133328	0.147867	0.316415	0.142397	0.46383	0.405138	0.301402	0.0389915	-0.0260424	0.0715916						120	1644.85	1927.45	1687.91	1588.12	2019.89	1765.24	1546.39	1306.03	1342.74	1720.85	1362.87	1877.36	1357.85	1354.68	120	1366.46	1353.98	1411.19	1418.53	1896.56	1385.92	1357.36	1267.23	1343.85	1660.41	1305.4	1476.48
	1240					0.374561	0.171733	0.333573	0.423466	0.217224	0.536019	0.601482	0.340578	0.0812721	0.100892	0.0754438						121	1625.2	1847.68	1691.31	1566.52	2037.41	1782.08	1519.67	1281.48	1347.18	1722.99	1361.42	1858.23	1368.2	1356.92	121	1333.46	1345.22	1428.13	1413.67	1918.17	1376.58	1370.21	1259.82	1331.04	1696.64	1295.95	1474.85
	1250					0.41881	0.19074	0.586849	0.464884	0.408021	0.537143	0.617223	0.478633	0.0529568	0.110543	0.0681877						122	1630.88	1794.91	1736.82	1577.56	2040.44	1796.81	1502.72	1281.84	1334.04	1727.29	1358.1	1862.71	1368.86	1358.84	122	1341.2	1357.77	1439.65	1422.63	1883.58	1366.42	1350.97	1255.34	1306.87	1679.47	1313.17	1454.01
	1260					0.489221	0.196679	0.680872	0.510359	0.427158	0.481042	0.682372	0.544161	0.035729	0.173585	0.112148						123	1617.69	1830.47	1682.46	1585.72	1988.13	1782.86	1515.92	1282.33	1337.54	1738.19	1350.82	1868.39	1380.82	1334.77	123	1350.06	1390.38	1408.84	1408.16	1877.3	1350.73	1344.86	1261.04	1319.87	1623.47	1312.75	1453.46
	1270					0.639608	0.223289	0.809671	0.637388	0.431428	0.525004	0.709265	0.565901	0.121895	0.204229	0.180663						124	1602.41	1825.96	1701	1597.3	1980.73	1766	1505.98	1269.53	1340.91	1722.92	1348.25	1866.82	1368.74	1364.91	124	1345.18	1391.63	1371.49	1429.77	1854.16	1340.14	1314.79	1261.42	1311.76	1638.87	1296.4	1484.65
	1280					0.764147	0.181711	0.861449	0.657655	0.490375	0.786816	0.81944	0.584163	0.165396	0.259102	0.157804						125	1556.44	1778.18	1696.97	1588.97	1997.78	1761.84	1505.56	1274.14	1354.11	1710.74	1342.08	1873.03	1350.69	1372.68	125	1347.94	1390.21	1375.46	1410.96	1825.7	1310.39	1310.83	1270.2	1298.95	1652.74	1287.43	1500.08
	1290					0.739411	0.299708	0.808159		0.485177	0.731294	0.805729	0.601302	0.125847	0.28086	0.181051						126	1566.25	1798.48	1636.27	1569.69	1981.21	1760.89	1524.44	1275.21	1344.03	1702.51	1340.51	1896.67	1368.1	1345.2	126	1349.43	1391.01	1362.52	1356.81	1810.11	1324.19	1316.97	1258.15	1285.79	1653.7	1297.69	1476.73
	1300					0.823197	0.327589	0.767107		0.599206	0.746001	0.753451	0.632744	0.124455	0.34462	0.22816						127	1565.73	1783.04	1649.77	1540.31	2014.15	1727.79	1509.53	1264.9	1334.03	1717.94	1334.22	1914.06	1373.07	1342.77	127	1324.13	1392.03	1352.92	1369.94	1772.37	1298.46	1335.93	1249.06	1306.52	1622.29	1295.88	1470.59
	1310					0.859293	0.350286	0.957665		0.588085	0.627153	0.789277	0.634136	0.163632	0.407037	0.174715						128	1537.82	1772.07	1676.24	1568.68	1985.34	1751.67	1483.06	1265.4	1327.94	1719.23	1326.05	1856.47	1371.54	1323.91	128	1342	1390.41	1364.6	1360.83	1736.74	1308.12	1301.65	1247.5	1282.62	1655.91	1300.16	1479.49
	1320					0.891799	0.383338	0.984821		0.564324	0.625548	0.775805	0.656185	0.199918	0.394733	0.251483						129	1549.52	1766.94	1652.62	1548.41	1949.87	1743.81	1476.39	1270.14	1325.74	1658.82	1329.29	1826.58	1351.03	1319.68	129	1328.73	1399.06	1359.86	1341.36	1706.86	1299.68	1292.78	1245.18	1268.41	1608.94	1305.57	1475.15
	1330					0.899711	0.403547	0.997803		0.665781	0.717485	0.870399	0.655256	0.258949	0.460443	0.250779						130	1495.15	1740.87	1655.94	1538.89	1915.81	1706.26	1497.6	1267.34	1303.52	1663.18	1334.28	1815.73	1361.13	1332.68	130	1355.77	1397.67	1343.26	1337.44	1676.51	1302.37	1310.38	1235.75	1263.72	1594.75	1304.88	1471.02
	1340					0.885738	0.412659	0.958261		0.609028	0.723169	0.779938	0.609398	0.230885	0.468926	0.32284						131	1507.02	1715.92	1651.48	1507.18	1949.02	1681.71	1494.86	1265.18	1298.42	1692.61	1314.25	1836.92	1381.12	1340.22	131	1337.69	1390.28	1322.74	1363.86	1672.21	1303.95	1326.38	1232.55		1583.58	1305.59	1477.18
	1350					0.902524		1.0273		0.690943	0.557662	0.782106	0.658884	0.259798	0.490318	0.248258						132	1506.24	1690.36	1591.57	1519.24	1891.57	1671.09	1474.97	1273.93	1312.46	1688.19	1315.88	1827.55	1374.58	1323.84	132	1341.62	1378.1	1339.81	1367.42	1644.23	1309.37	1328	1257.76		1589.95	1286.23	1469.64
	1360					0.900939		1.04939		0.632992	0.760323	0.766684	0.620606	0.255368	0.452853	0.282889						133	1507.01	1690.05	1581.67	1548.21	1914.16	1634.48	1462.34	1280.44	1307.87	1685.68	1339.54	1790.98	1363.88	1312.33	133	1315.11	1380.87	1330.75	1345.4	1619.51	1302.23	1339.98	1263.39		1559.36	1285.91	1472.74
	1370					0.923744		1.1442		0.658204	0.609909	0.778299	0.629631	0.2955	0.439462	0.349437						134	1516.03	1671.36	1587.29	1535.03	1855.11	1642.94	1460.61	1271.94	1314.16	1671.62	1335.38	1745.75	1358.99	1313.5	134	1316.63	1381.45	1323.8	1351.64	1608.33	1285.2	1313.46	1263.33		1587	1284.03	1489.66
	1380					0.879355		1.13733		0.601434	0.530592	0.78716	0.658736	0.229944	0.471956	0.323866						135	1491.85	1644.6	1585.33	1509.49	1846.23	1614.89	1481.86	1265.5	1320.58	1671.96	1335.85	1720.58	1347.44	1316.13	135	1331.73	1382.05	1306.82	1321.52	1582.73	1282.41	1324.02	1257.44		1580.12	1305.48	1482.44
	1390					0.915452		0.998037		0.630207	0.594206	0.823689	0.630425	0.274705	0.510867	0.396336						136	1488.82	1679.32	1535.48	1490.43	1856.07	1593.13	1481.9	1262.85	1300.57	1692.05	1322.78	1716.15	1357.79	1311.77	136	1327.73	1395.13	1322.62	1314.88	1550.61	1284.62	1323.99	1251.97		1580.6	1296.95	1473.21
	1400					0.86172		1.10972		0.690183	0.717582	0.810341	0.641421	0.278643	0.548967	0.419499						137	1470.21	1679.3	1554.88	1476.82	1834.43	1622.54	1484.57	1256.01	1287.69	1671.51	1297.75	1725.84	1361.43	1317.22	137	1315.39	1392.43	1335.41	1321.92	1527.24	1279.93	1308.91	1250.25		1577	1285.63	1477.44
	1410					0.918097		1.03803		0.621735	0.706599	0.739493	0.667219	0.288683	0.505501	0.309616						138	1452.95	1649.5	1578.89	1473.42	1843.13	1606.46	1505.59	1245.33	1295.31	1656.21	1309	1756.04	1354.74	1307.83	138	1328.65	1395.58	1341.37	1325.68	1508.85	1280.26	1320.89	1250.88		1541.85	1290.53	1442.39
	1420					0.877124		0.907567		0.617348	0.517586	0.820941	0.699282	0.328073	0.536638	0.360879						139	1474.39	1654.82	1565.84	1467.4	1814.69	1594.48	1503.38	1248.33	1282.21	1661.22	1318.67	1767.9	1375.75	1291.52	139	1316.12	1384.19	1318.23	1319.66	1480.01	1295.33	1325.05	1244.63		1559.38	1287.74	1440.77
	1430					0.964043		0.941108		0.611391	0.57192	0.76957	0.6371	0.294877	0.498643	0.364583						140	1458.37	1628.86	1532.88	1485.96	1783.97	1557.9	1485.34	1246.98	1278.41	1612.27	1320.07	1776.57	1383.41	1295.07	140	1311.91	1381.05	1325.26	1317.08	1480.75	1282.49	1349.73	1233.09		1586.25	1287.39	1453.38
	1440					0.953605		0.977351		0.582128	0.755892	0.777763	0.684307	0.314611	0.506802	0.379303						141	1447.53	1568.58	1493.24	1482.9	1778.26	1543.83	1493.18	1251.22	1277.92	1643.09	1296.82	1771.93	1361.15	1292.47	141	1314.11	1396.58	1326.79	1333.35	1430.09	1296.82	1342.93	1255.1		1595.88	1278.89	1439.48
	1450					0.95841		1.0137		0.664532	0.819417	0.748194	0.67848	0.310739	0.493822	0.249519						142	1443.57	1544.57	1518.16	1475.53	1748.92	1548.85	1504.34	1255.52	1265.54	1686.2	1278.14	1764.92	1338.42	1278.02	142	1313.88	1363.76	1319.13	1331.22	1425.4	1319.87	1320.05	1253.62		1573.51	1294.66	1446.55
	1460					0.939422		0.887541		0.699853	0.798244	0.721439	0.644864	0.278524	0.523798	0.363462						143	1423.78	1587.29	1516.82	1476.76	1781.82	1531.17	1487.5	1249.46	1284.44	1656.02	1279.94	1791.21	1358.51	1278.78	143	1329.15	1383.07	1306.6	1342.33	1410.32	1286.19	1329.18	1242.73		1539.61	1305.95	1464.08
	1470					0.910311		0.70158		0.612825	0.961311	0.770824	0.641843	0.340712	0.472908	0.378329						144	1401.49	1597.78	1513.9	1450.56	1728.71	1512.67	1466.06	1263.57	1293.01	1629.44	1294.91	1786.53	1371.28		144	1335.6	1404.6	1320.09	1318.01	1374	1267.41	1327.82	1243.31		1552.18	1307.97	1465.62
	1480					0.935339		0.988864		0.630561	0.955364	0.721852	0.604602	0.318311	0.517969	0.334448						145	1404.67	1558.04	1507.85	1427.67	1705.93	1516.15	1466.38	1266.22	1272.92	1606.88	1313.26	1729.12	1367.41		145	1336.92	1386.54	1318.25	1295.82	1351.33	1278.74	1335.73	1240.32		1602.57	1294.47	1452.25
	1490					0.971002		0.969562		0.596236	0.859861	0.75364	0.664624	0.367382	0.437237	0.32597						146	1423.78	1556.29	1483.74	1429.32	1678.09	1487.23	1490.91	1254.3		1601.84	1313.07	1739.36	1366.42		146	1319.44	1377.66	1311.28	1282.15	1348.07	1290.48	1342.48	1243.05		1579.51	1290	1475.74
	1500					0.982008		0.902055		0.58531	0.842664	0.681516	0.665167	0.361189	0.508628	0.34649						147	1396.73	1531.97	1513.94	1462.11	1656.3	1487.96	1508.16	1249.44		1626.21	1298.84	1764.23	1389.67		147	1335.79	1392.86	1301.68	1284.6	1342.77	1288.43	1337.84	1238.75		1572.53	1283.11	1494.02
	1510					0.973183		0.998228		0.644102	0.908836	0.685482	0.669899	0.449642	0.453274	0.384416						148	1436.05	1541.11	1485.2	1449.3	1659.33	1506.51	1505.94	1252.43		1616.48	1286.36	1754.86	1398.86		148	1327.22	1380.66	1317.6	1298.63	1322.77	1277.24	1358.11	1232.96		1531	1291.41	1492.6
	1520					0.925778		0.851021		0.597432	0.832675	0.777328	0.677226	0.410482	0.513687	0.350185						149	1424	1551.85	1467.56	1464.25	1630.97	1481.56	1500.16	1244.67		1627.73	1277.29	1738.46	1379.36		149	1316.53	1382.05	1305.97	1299.47	1300.08	1269.18	1344.53	1253.36		1531.74	1280.96	1493.93
	1530					0.972363		0.773662		0.652211	0.956634	0.722628	0.675498	0.444808	0.511546	0.37866						150	1443.31	1565.02	1472.87	1445.51	1585.25	1457.44	1502.49	1242.3		1635.31	1287.44	1750.72	1371.5		150	1317.21	1360.51	1305.67	1311.42	1282.07	1268.4	1346.92	1251.76		1569.92	1291.79	1473.96
	1540					0.863297		0.782004		0.584058	0.896602	0.690188	0.584807	0.385712	0.438454	0.396649						151	1432.83	1538.92	1463.22	1429.8	1572.6	1458.37	1509.95	1251.48		1629.19	1311.17	1716.75	1363.04		151	1312.54	1329.39	1306.36	1322.49	1291.84	1275.34	1358.75	1243.49		1529.91	1302.9	1455.8
	1550					0.899424		0.797221		0.661916	1.06395	0.690326	0.699938	0.446519	0.509664	0.410161						152	1390.98	1515.48	1471.93	1423.8	1543.43	1458.19	1527.45	1253.67		1637.05	1317.16	1668.4	1365.82		152	1310.48	1347.8	1317.14	1311.87	1289.68	1286.5	1345.78	1245.08		1541.28	1291.08	1460.56
	1560					0.88613		0.803754		0.719353	0.907719	0.697257	0.728723	0.446285	0.493962	0.38745						153	1395.63	1494.29	1431.57	1412.69	1555.88	1428.53	1523.82	1249		1609.93	1305.46	1688.93	1365.56		153	1322.91	1371.94	1316.39	1302.78	1280.47	1295.61	1343.03	1230.73		1561.42	1300.58	1462.1
	1570					0.880096		0.711263		0.641067	1.00834	0.664245	0.74632	0.481471	0.519068	0.399892						154	1392.66	1491.78	1452.37	1425.61	1536.63	1434.14	1508.46	1256.4		1575.61	1293.23	1698.99	1359.33		154	1325.56	1380.23	1307.8	1299.68	1268.32	1303.86	1330.17	1243.04		1524.36	1307.65	1460.92
	1580					0.871648		0.825079		0.514825	0.644548	0.646313		0.463042	0.525456	0.397562						155	1386.14	1481.29	1453.34	1407.11	1532.93	1442.39	1515.33	1250.6		1589.96	1299.64	1694.35	1342.7		155	1313.73	1350.8	1307.16	1300.21	1262.9	1276.51	1337.46	1242.06		1530.72	1300.71	1448.13
	1590					0.848136		0.89616		0.473453	0.858845	0.625873		0.474557	0.486384	0.398571						156	1401.16	1477.28	1420.48	1394.69	1503.8	1412.45	1519.08	1239.69		1590.17	1305.09	1666.4	1322.35		156	1315.27	1347.48	1307.78	1289.26	1262.03	1280.75	1353.84	1235.43		1549.06	1294.08	1455.67
	1600					0.856313		0.840487		0.578349	0.765334	0.616498		0.494451	0.542746	0.436818						157	1430.82	1492.42	1417.22	1391.75	1512.42	1406.77	1494.69	1252.92		1590.04	1301.1	1668.4	1341.09		157	1316.79	1357.21	1319.13	1279.95	1266.46	1275	1370.42	1243.33		1570.94	1309.93	1455.03
	1610					0.8811		0.905162		0.579103	1.04636	0.692167		0.455972	0.505679	0.446487						158	1418.06	1496.25	1390.82	1396.79	1503.38	1421.27	1490.07	1249.57		1598.84	1290.48	1678.19	1352.43		158	1316.23	1371.9	1318.69	1286.7	1248.83	1280.41	1338.59	1241.86		1579.94	1320.33	1433.54
	1620					0.806181		0.848318		0.492793	1.01303	0.635459		0.441608	0.547661	0.467884						159	1449.92	1457.51	1384.81	1412.13	1481.12	1410.37	1538.6	1235.03		1601.83	1303.96	1681.28	1344.35		159	1321.17	1345.78	1299.2	1307.53	1240.28	1284.1	1340.1	1252.25		1545.54	1308.76	1436.99
	1630					0.825661		0.79107		0.593608	1.20919	0.617941		0.458241	0.550366	0.453486						160	1444.86	1470.15	1393.7	1407.71	1440.84	1395.12	1533.18	1247.08		1594.06	1318.13	1644.35	1347.63		160	1338.84	1364.49	1301.75	1302.37	1255.08	1280.15	1342.16	1244.81		1535.78	1302.3	1436.24
	1640					0.884971		0.644736		0.496034	1.08443	0.655196		0.410111	0.530606	0.374643						161	1405.13	1479.87	1403.31	1397.57	1437.27	1388.05	1507.84	1245.52		1567.94	1325.15		1332.13		161	1330.31	1343.59	1303.98	1297.32	1269.21	1269.58	1347.65	1240.31		1547.88	1320.41	1426.2
	1650					0.800386		0.713178		0.459068	1.17055	0.648185		0.453766	0.525666	0.444974						162	1401.28	1484.84	1405.34	1368.65	1446.75	1366.14	1497.63	1238.52		1580.78	1314.17		1311.83		162	1360.73	1341.74	1285.63	1308.2	1257.17	1274.24	1337.65	1264.84		1532.44	1314.88	1419.09
	1660					0.860403		0.885221		0.521688	0.961734	0.607743		0.418784	0.560764	0.481874						163	1386.36	1474.13	1392.58	1379.21	1424.48	1344.82	1485.13	1238.79		1576.28	1303.34		1312.35		163	1332.61	1340.93	1307.8	1303.1	1238.42	1274.94	1329.47	1256.49		1510.55	1319.44
	1670					0.832833		0.867621		0.57367	1.12688	0.643918		0.402728	0.544077	0.433697						164	1358.64	1475.83	1387.25	1422.13	1405.5	1364.67	1494.14	1243.48		1555.97	1290.33				164	1323.6	1340.39	1291.97	1287.53	1248.71	1278.79	1329.65	1242.04		1530.77	1325.98
	1680					0.853056		0.838039		0.52889	1.01431	0.601126		0.431067	0.552119	0.393406						165	1371.19	1476.43	1379.83	1391.27	1392.37	1384.35	1496.31	1241.78		1547.57	1303.91				165	1307.68	1367.98	1295.53	1292.52	1237.3	1279.58	1338.22	1251.6		1540.69	1304.91
	1690					0.794216		0.881135		0.495548	0.88333	0.722682		0.461412	0.608552	0.386989						166	1364.55	1451.96	1393.64	1391.54	1380.83	1386.14	1476.43	1240.6		1546.98	1305.39				166	1320.24	1343.28	1298.14	1307.53	1252.16	1277.91	1321.65	1254.58		1515.49	1308.02
	1700					0.788889		0.661378		0.647589	1.0247	0.718593		0.424349	0.638036	0.387076						167	1355.61		1410.85	1390.78	1368.93	1391.6	1463.61	1236.93		1535.03	1299.98				167	1331.88	1340.01	1307.29	1319.96	1247.7	1261.15	1307.11	1243.73		1485.18	1334.49
	1710					0.784889		0.752082		0.593898	0.94167	0.661552		0.435414	0.569593	0.398118						168	1361.46		1378.79	1375.92	1366.88	1378.63	1426.66	1229.05		1524.86	1310.15				168	1319.93		1310.42	1320.47	1233.56	1251.9	1342.3	1251.17		1509.45	1317.78
	1720					0.828869		0.776003		0.603279	1.16073	0.635531		0.420926	0.624692	0.409656						169	1340.84		1379.63	1363.51	1365.44	1365.62	1397.26	1229.45		1536.46	1313.03				169	1314.06		1303.4	1298.01	1229.98	1281.75	1341.95	1246.41		1538.31	1304.89
	1730					0.830644		0.714668		0.643613	0.935496	0.63875		0.366033	0.594995	0.388946						170	1332.36		1378.38	1383.67	1344.36	1379.29	1417.75	1233.65		1531.69	1313.64				170	1323.27		1308.06	1289.83	1228.77	1269.91	1324.73	1233.58		1526.7	1317.98
	1740					0.806657		0.632413		0.657319	1.04935	0.718203		0.39779	0.620866	0.41549						171	1336.81		1376.06	1392.27	1327.69	1373.88	1416.61	1226.48		1528.1	1309.18				171	1317.87		1312.17	1291.03	1231.39	1273.29	1323.89	1237.79		1506.46	1315.93
	1750					0.811731		0.713519		0.548158	0.904063	0.720268		0.404591	0.574199	0.443565						172	1342.28		1369.45	1387.52	1349.5	1364.99		1217.95		1524.29	1305.95				172	1326.93		1295.25	1302.71	1245.58	1275.11	1287.49	1239.37		1512.13	1315.59
	1760					0.824706		0.597341		0.442642	0.408328	0.726505		0.473692	0.630583	0.453877						173	1321.75		1377.84	1362.59	1340.81	1361.24		1222.7		1513.93	1315.75				173	1324.38		1295.31	1311.6	1233.35	1286.78		1254		1516.41	1316.67
	1770					0.812855		0.634095		0.606192	0.648993	0.638032		0.370604	0.694469	0.388337						174	1340.99		1380.75	1357.56	1353.41	1368.24		1228.02		1515.2	1308.52				174	1319.37		1303.19	1293.33	1227.69	1284.71		1252.96		1521.1	1298.19
	1780					0.790535		0.775024		0.545804	0.502166	0.680477		0.40167	0.65787	0.405039						175	1321.8		1365.25	1383.93	1343.4	1370.5				1514.61	1307.4				175	1331.92		1304.92	1296.57	1226.87	1277.78		1255.57		1541.54	1305.56
	1790					0.785189		0.826462		0.563434	0.694677	0.68335		0.441338	0.662058	0.400822						176			1368.38	1404.05	1322.88	1376.52				1486.94	1307.85				176	1312.83		1290.59	1308.48	1237.38	1277.23		1261.21		1533.29	1312.38
																						177			1357.92	1382.06	1317.78	1362.16				1465.46	1301.46				177	1292.44		1282.92	1305.01	1242.43	1292.14		1259.74		1505.56	1311.19
																						178			1352.14	1370.28	1333.15	1337.77				1461.52	1285.78				178	1292.19		1291.87	1298.98	1238.29	1277.41		1249.23		1538.87	1295.62
																						179			1362.34	1378.39	1321.38	1343.2				1453.43	1278.98				179			1298.08	1288.22	1248.43	1269.36		1250.24		1553.21	1290.8
																						180			1348.46	1372.97	1305.49	1346.09					1278.39				180			1288.01	1298.39	1238.07	1274.15		1248.29		1538.15	1296.21
																						181			1353.03	1368.15	1282.77	1329.84					1286.15				181			1290.54	1309.69	1231.42	1292.28		1246.76		1526.64	1296.73
																						182			1377.07	1370.45	1275.97	1331.51					1296.49				182			1307.81	1314.23	1233.87	1279.29		1251.09		1553.88	1282.61
																						183			1373.97	1380.64	1283.96	1342.77					1283.68				183			1280.37	1303.24	1239.93	1281.67		1250.92		1524.21	1273.51
																						184			1336.99	1372.6	1286.69	1341.91					1267.31				184			1277.23	1299.37	1229.13	1285.52		1240.57		1532.93	1275.47
																						185			1344.29	1367.31	1281.02	1325.89					1268.61				185			1298.51	1300.83	1238.16	1279.61		1223.13		1529.75	1267.7
																						186			1352.5	1366.16	1278.71	1306.78					1263.6				186			1290.16	1292.31	1248.04	1281.83		1225.62		1534.21
																						187			1347.48	1371.89	1283.67	1310.84					1252.18				187			1277.23	1282.51	1252.92	1264.83				1526.72
																						188			1342.71	1384.99	1284.53	1318.57					1249.42				188			1281.3	1288.3	1224.06	1267.86				1504.2
																						189			1335.19	1386.6	1270.16	1322.82					1257.13				189			1277.94	1296.69	1228.84	1279.66				1498.57
																						190			1333.17	1371.86	1286.9	1311.07					1264.71				190			1281.34	1300.48	1227.3	1275.37				1502.96
																						191			1318.49	1379.7	1294.01	1302.85					1260.67				191			1298.13	1296.53	1226.84	1275.95				1499.84
																						192			1342.35	1386	1276.3	1312.76					1263.22				192			1281.38	1301.56	1229.7	1289.67				1491.19
																						193			1348.22	1367.24	1269.11	1298.85					1262.37				193			1273.38	1298.92	1240.03	1262.63				1462.94
																						194			1345.02	1371.84	1281.75	1284.13									194			1266	1300.06	1224.26	1262.88				1467.28
																						195			1333.92	1381.89	1291.91	1289.7									195			1256.75	1293.09	1227.37	1270.98				1444.26
																						196			1329.77	1374.33	1276.66	1288.68									196			1259.08	1298.75	1216.49					1445.28
																						197			1335.88	1374.12	1260.26	1288.63									197			1253.5	1316.63	1219.64
																						198			1337.61	1370.6	1266.31	1281.65									198			1259.57	1310.93	1226.51
																						199			1345.48	1367.02	1257.07	1283.38									199			1268.03	1300.91	1241.5
																						200			1340.47	1377.51	1259.55	1302.08									200			1264.83	1293.16	1229.85
																						201			1331.81	1388.34	1277.55	1299.24									201			1259.98	1297.06	1232.99
																						202			1331.08	1377.48	1267.91	1279.89									202			1266.4	1306.91	1238.56
																						203			1342.46	1343.56	1266.68	1279.05									203			1263.33	1299.78	1229.56
																						204			1341.34	1334.74	1270.12										204			1265.96	1292.8	1224.69
																						205			1327.44	1347.07	1266.79										205			1260.88	1297.81	1223.4
																						206			1334.66	1338.63	1273										206			1271.8	1301.36	1219.35
																						207			1344.11	1325.64	1263.97										207			1260.88	1301.34	1223.19
																						208			1340.36	1320.47	1256.54										208			1260.63	1288.23	1222.42
																						209			1339.68	1323.27	1244.3										209			1267.62	1283.98	1226.76
																						210			1327.59	1308.36	1251.04										210				1292.97	1219.14
																						211			1321.07	1286.2	1260.1										211					1218.63
																						212			1320.25	1301.79	1253.68										212					1218.98
																						213			1308.04	1300.79	1256.56										213					1210.75
																						214			1317.19	1290.56	1240.64										214					1220.06
																						215			1321.4		1245.12										215					1211.56
																						216			1304.3		1245.75										216					1212.6
																						217			1309.22		1255.63										217					1215.58
																						218			1308.97		1250.19										218					1206.47
																						219			1303.45		1252.23										219					1213.65
																						220			1307.12		1262.72										220					1213.55
																						221			1302.06		1261.98										221					1208.05
																						222			1286.32		1255.94										222					1208.01
																						223			1284.15		1251.95										223					1214.69
																						224			1291.15		1239.26										224					1224.88
																						225			1291.67		1246.34										225					1219.42
																						226			1287.42		1256.84										226					1215.43
																						227			1272.99		1255.1										227					1215.32
																						228			1273.55		1269.36										228					1216.83
																						229			1287.68		1265.01										229					1216.95
																						230			1264.9		1260.04										230					1215.38
																						231			1263.92		1259.95										231					1213.03
																						232			1270.53		1252.82										232					1220.51
																						233			1253.52		1254.37										233					1222.01
																						234			1257.91		1253.23										234					1216.61
																						235			1269.34		1244.08										235					1219.17
																						236			1253.8		1246.47
																						237			1247.9		1238.28
																						238			1259.26		1231.82
																						239			1264.11		1233.51
																						240			1265.9		1237.26
																						241			1261.08		1246.5
																						242			1272.96		1244.5
																						243			1277.17		1244.78
																						244			1271.27		1240
																						245			1282.51		1239.27
																						246			1281.41		1233.7
																						247			1285.32		1231.87
																						248			1289.61		1230.32
																						249					1231.45
																						250					1221.21
																						251					1218.4
																						252					1227.66
																						253					1227.12
[truncated: 47 more columns]

## Sheet: Figure 2
Figure 2D		opto			ctrl			CENP-A-GFP-only		Figure 2E	Aligned	Misaligned	Figure 2F	Aligned	Misaligned	Figure 2G		opto			ctrl			CENP-A-GFP-only		Figure 2H		opto			ctrl			CENP-A-GFP-only		Figure 2J		opto	ctrl
	t=0	t=20	t=30	t=0	t=20	t=30	t=0	t=20	t=30		t=20	t=20		t=20	t=20		t=0	t=20	t=30	t=0	t=20	t=30	t=0	t=20	t=30		t=0	t=20	t=30	t=0	t=20	t=30	t=0	t=20	t=30		Lagging	13	8
n (measurement)	290	240	228	269	227	133	106	94	64	n (measurement)	107	11	n (measurement)	74	19	n (measurement)	226	186	178	168	136	93	77	66	47	n (measurement)	290	240	228	269	227	133	106	94	64		No lagging	15	31
	dEQ (µm)	dEQ (µm)	dEQ (µm)	dEQ (µm)	dEQ (µm)	dEQ (µm)	dEQ (µm)	dEQ (µm)	dEQ (µm)		dAX (µm)	dAX (µm)		dKC (µm)	dKC (µm)		dKC (µm)	dKC (µm)	dKC (µm)	dKC (µm)	dKC (µm)	dKC (µm)	dKC (µm)	dKC (µm)	dKC (µm)		alphaKC (º)	alphaKC (º)	alphaKC (º)	alphaKC (º)	alphaKC (º)	alphaKC (º)	alphaKC (º)	alphaKC (º)	alphaKC (º)		All	28	39
	0.913287	0.124389	0.948798	0.192079	0.826821	0.0233149	0.189155	0.0760831	0.314189		6.52464	2.32837		0.85822	0.684999		0.7553	0.81174	0.76194	0.521987	0.782524	0.866354	0.802776	0.950765	1.00554		7.53217	21.0356	10.2425	6.74259	26.3037	12.048	4.23679	10.1344	18.2406
	0.0136523	1.23225	1.36191	0.463329	0.499838	0.0994768	0.679679	1.05744	0.470678		5.95926	1.83668		0.82668	0.64823		0.68724	0.73123	0.8134	0.919723	0.717701	0.706994	0.944291	0.913415	0.912585		6.03264	9.80892	25.2324	6.82785	8.01513	18.6177	9.06618	23.0757	3.19057
	1.48854	0.543165	0.172755	0.996785	0.0528213	0.331744	0.782561	0.423169	0.802659		3.83817	0.92525		0.800701	0.50132		0.90304	0.8466	0.6142	0.705334	0.78103	0.77771	0.919723	0.802776	0.647649		7.24631	21.6652	20.9237	51.9151	47.409	1.26368	12.036	1.84952	19.5617
	0.584308	0.710812	0.087425	1.19941	0.171062	2.02137	0.370213	0.128997	0.825361		2.48692	0.22902		0.79846	0.72625		0.78601	0.86071	0.69637	0.779121	0.798045	0.896068	0.868346	0.83415	0.900799		46.6314	23.417	23.747	1.62527	3.44121	37.6514	5.1577	10.6124	4.02434
	0.894907	3.11581	0.504111	0.78712	0.106221	0.848583	1.03044	0.1716	1.54066		1.29285	1.69676		0.83913	0.73289		0.65985	0.61918	0.72791	0.659933	0.719859	0.748826	0.792235	0.913415	0.717701		8.47364	11.4304	1.2699	1.38752	23.2703	10.5069	0.398803	5.66971	13.8808
	0.346669	1.4044	1.97879	0.268594	2.54929	2.08269	0.0502108	0.649959	0.201956		1.81487	0.93507		0.92545	0.67562		0.75281	0.79846	0.72542	0.673711	0.798045	0.781777	0.885776	0.771734	0.776631		37.6634	13.0789	11.5344	30.6179	0.957501	34.4427	3.1792	10.5482	2.1513
	0.637083	0.165709	0.154718	0.363557	3.53128	0.157986	0.886215	0.442198	0.211266		5.4265	1.92527		0.78684	0.5727		0.65238	0.6308	0.80427	0.900799	0.78352	0.573198	0.89308	0.80427	0.696619		29.1022	21.8456	8.39491	0.998429	35.9124	72.8266	12.7334	3.48933	20.344
	0.200489	3.18262	1.67513	1.22518	3.59601	0.802383	0.190787	0.564123	0.559572		5.07327	1.2084		0.67562	0.78933		0.82502	0.8134	0.85656	0.841454	0.85407	0.597434	0.727827	0.969938	0.996415		2.94498	12.5745	24.1036	14.1918	44.1099	6.96831	1.57409	8.93236	47.8185
	0.954839	0.756945	0.288487	0.573293	1.7008	0.395679	0.861084	0.0139752	1.92467		4.14232	2.47925		0.81672	0.858137		0.68309	0.7055	0.66898	0.747498	0.942299	0.871915	0.868761	0.809914	0.724092		28.1135	0.810739	78.1105	19.4669	21.2915	28.9118	21.7694	7.39915	33.7822
	0.0161765	1.65525	0.839811	0.0822579	0.0235789	0.870109	1.32888	0.145513	0.92516		5.28329	4.89333		0.80842	0.60424		0.798045	0.822613	0.7138	0.958816	0.759699	0.821866	0.913415	0.806594	0.814147		2.31562	13.6617	8.86454	12.6487	45.9575	33.5407	7.8915	0.749181	11.2178
	0.958051	0.586619	1.78631	1.30392	1.82811	0.0315975	0.132778	0.560236	1.04173		4.66669	0.46138		0.79846	0.71546		1.02032	0.607394	0.62582	0.678359	0.853738	0.843861	0.868346	0.858137	0.641756		17.0509	24.0908	21.9287	46.3875	22.5411	18.9099	4.95736	14.8019	14.5356
	1.14397	0.258728	2.16289	0.417821	1.4961	0.285201	0.16474	0.426886	0.0939954		3.33			0.85075	0.88063		0.83	0.830498	0.88395	0.691805	0.706994	0.783105	0.786425	0.80427	0.779121		8.48966	9.03566	44.295	8.47829	17.4775	13.4835	9.85881	28.8568	12.2808
	1.13915	0.0916946	0.656939	0.808438	1.77772	0.0460201	0.366513	0.910633	0.18933		1.94541			0.77937	0.64989		0.698279	0.659933	0.67562	0.553361	0.71546	0.785678	0.638768	0.822613	0.752644		7.83557	5.58234	38.6753	1.38752	0.957501	1.26368	2.24463	11.9357	16.3142
	0.84374	1.30834	0.0428183	0.555492	1.31493	0.356718	0.719353	0.362199	0.356532		4.63921			0.7885	0.67562		1.01733	0.80925	0.8134	0.784599	0.640594	0.774805	0.751565	0.947113	0.832324		26.4057	3.02923	50.6686	4.24992	2.05529	3.93357	12.5958	3.81355	6.76363
	0.148209	1.4312	1.92463	2.59981	0.296816	0.184698	0.56664	1.04704	0.615115		3.96194			0.81589	0.67479		1.01733	0.61337	0.81589	0.79016	0.548215	0.830498	0.919723	0.621753	0.779121		3.90114	10.193	26.2868	35.0776	16.4816	1.26368	18.2165	5.26081	20.3802
	0.46553	1.60662	0.0036278	2.47807	0.911081	0.832751	0.131095	1.19858	0.312242		3.48156			0.70467	1.01177		0.792235	0.75945	0.88976	0.696204	0.626318	0.913083	0.809914	0.830498	0.735131		9.89595	5.91352	60.8044	1.38752	57.613	31.3376	7.8915	17.0679	7.09993
	1.10983	1.9067	1.78135	1.11708	0.817575	0.459539	0.632691	0.184632	0.615054		5.37377			0.65155	0.808005		0.816969	0.664	0.853323	1.02812	0.948939	0.883784	0.978155	0.683339	0.859465		4.70242	12.1021	19.7049	1.38752	14.6848	29.6948	4.09179	4.39752	9.75653
	0.839474	0.812385	2.02999	1.84829	0.474178	0.597729	0.486911	0.333905	0.573605		3.54051			0.9628	1.1122		0.86652	0.6391	1.05808	0.861706	0.705334	1.05194	0.719361	0.744925	0.884033		6.7063	9.58131	37.1076	4.4003	14.198	1.33356	2.51778	9.35868	11.5608
	2.00294	1.77366	2.2125	0.469573	0.0169364	0.642961	0.332519	1.29887	0.425191		1.31376			0.88312	0.68973		0.80842	0.75945	0.97276	0.889345	0.697532	0.999486	0.858137	0.997577	0.923458		23.5556	27.4706	5.08397	27.6671	8.59131	1.269	11.6964	2.77892	23.9758
	1.61936	0.941826	1.16963	0.44706	0.276142	0.180336	1.66958	0.698913	0.733043		1.40198			0.83			0.74202	0.85075	1.09975	0.547219	0.763185	0.76526	0.966369	0.705334	0.857639		32.8017	67.1932	6.49527	16.7796	6.55499	9.79977	19.5136	8.78448	19.5451
	1.38099	2.10494	2.33431	0.0217748	0.903855	0.50313	1.158	0.077839	0.409596		0.012356			0.697532			0.75032	0.70052	0.77854	0.643582	0.73372	1.03709	0.996	0.802776	0.991767		13.883	15.0974	16.0135	25.8191	2.88117	1.269	23.9448	5.01536	5.2161
	0.957852	0.599019	1.2146	0.896011	1.7956	2.29113	0.0228887	1.38912	1.15963		0.283643			0.72044			0.79846	0.79265	0.86486	0.895902	0.618682	0.684418	0.747498	0.830498	0.755134		18.5517	61.6761	72.835	8.71633	0.154853	1.269	7.48199	8.27836	0.250872
	0.736044	0.0881199	1.00939	0.149992	0.21765	0.615979	1.63838	0.851588	0.372326		0.349227			0.69056			0.8217	0.60175	0.89225	0.669146	0.641756	0.709733	0.874903	0.719859	0.721436		8.31976	19.0134	38.1977	0.745997	16.5444	16.085	7.16764	4.04444	14.7893
	0.475171	2.12728	1.29947	0.794755	0.575165	0.740646	0.238844	0.783155	0.308496		1.27578			0.6225			0.78684	0.6972	0.9213	0.644827	0.550705	0.729819	0.727827	0.591458	0.719361		18.5517	30.5371	21.5878	8.22663	0.154853	36.8067	7.97007	26.2749	0.250872
	1.61114	0.13955	0.832612	0.40378	0.023554	0.781282	0.0311984	0.790769	0.295282		2.03725			0.70633			0.76526	0.664	0.85158	0.621421	0.929434	0.826099	0.819293	0.691639	0.669146		6.23667	32.0342	34.4824	14.7822	6.97017	23.3546	2.31665	17.4339	11.4381
	0.29072	0.54743	0.523974	1.39516	0.270198	0.629175	0.978157	0.830986	0.759359		2.63333			0.57768			0.82253	0.72044	0.92877	0.674541	0.878472	0.754138	0.809914	0.806594	1.06763		3.61466	34.7909	9.32311	18.5441	18.5898	13.9861	26.4682	19.3625	23.4495
	0.439462	1.71925	0.604828	0.462189	1.64081	0.635871	0.243282	0.147168	1.12309		3.96428			0.85407			0.74285	0.89142	0.90968	0.726997	0.806594	0.735961	0.858137	0.912585	0.769244		5.95443	12.3153	10.6582	10.5639	11.4648	1.269	11.876	29.987	17.7773
	2.96763	0.901104	1.30514	0.190841	0.355777	0.484204	0.639037	0.297537	0.676299		7.23448			0.79763			0.85407	0.5727	0.92711	0.595027	0.490281	0.918893	1.06862	1.04987	0.89308		8.31976	49.3867	20.2324	5.26301	0.154853	13.4039	6.61736	19.3601	3.98763
	0.77206	0.332129	0.583835	0.242549	1.02129	1.06815	0.545961	1.03851	1.92958		6.49327			0.69637			0.84162	0.56025	0.78435	0.74866	0.924786	0.639183	0.669146	0.817467	1.1293		21.9453	20.6606	3.39491	7.78477	3.02498	3.58908	0.945475	29.3687	18.688
	0.932091	3.73246	0.547351	0.553773	0.197517	0.412914	1.72617	1.71733	0.410402		7.62419			0.86071			0.82336	0.82004	0.73372	0.682509	0.7055	0.972594	0.796551	0.744925	1.03592		13.1479	78.2822	31.7561	1.98032	20.6996	13.905	8.19691	14.9651	10.1138
	0.95513	3.005	1.50414	1.90052	0.403278	0.260554	1.02739	0.763474	0.39197		6.38829			0.795306			0.75613	0.875484	0.963547	0.872496	0.802112	1.01758	0.848675	0.882705	1.03999		25.6767	29.7347	34.4824	4.9646	15.679	0.409249	10.502	18.0335	6.59107
	0.289765	0.230156	2.35097	0.505738	1.21247	0.446855	1.5752	0.109637	0.39943		5.45643			0.7055			0.82585	0.73289	0.783022	0.6225	0.706745	0.779702	0.955164	0.913415	1.25479		0.888347	26.942	24.2909	25.8191	18.2801	29.2201	4.72647	20.0224	5.60703
	0.132263	1.4167	0.122281	1.95331	0.0791862	0.20542	2.13768	0.861085	0.901544		5.33831			0.85158			0.91383	0.8964	0.816969	0.946864	0.832324	0.844276	0.831826	0.939477	0.852327		5.82149	7.08678	3.44405	13.9976	0.154853	0.409249	15.3023	6.45528	9.71506
	0.055865	1.12662	0.0894811	1.0373	0.11861	0.304721	0.412613	0.824741	0.300431		5.27688			0.7968			0.97442	0.7055	0.864362	0.798294	0.684418	0.845189	0.840043	0.978985	0.806594		10.4216	36.2146	0.792343	0.745997	1.37461	0.409249	23.6464	30.6718	3.9813
	1.20505	1.0484	0.742823	0.619367	0.199575	0.00444632	0.0894214	0.0163723	0.529612		4.3288			0.913			0.88312	0.905862	0.85407	0.671055	0.929434	0.855647	0.783022	0.858137	0.887021		14.6747	9.46722	7.63463	10.754	0.746483	0.409249	37.2849	10.016	6.33082
	0.310431	0.325713	1.08395	0.17636	0.0847501	0.57728	0.669233	0.366285	0.81068		3.24307			0.76775			0.913	0.767999	0.900799	1.12739	0.866769	0.848675	0.861706	0.83	0.89308		10.0482	26.942	8.55751	9.11981	25.8186	7.25202	26.036	7.7706	13.8795
	1.53746	0.0626582	1.00162	0.226988	2.07962	0.566609	0.211235	0.104106	0.597798		4.55642			0.69388			0.83996	0.83249	0.699939	0.836474	0.805681	1.05991	0.859465	1.07618	1.06439		27.8158	64.6062	53.387	1.74356	0.746483	6.74944	38.5691	4.86868	3.73988
	0.266752	0.047096	1.56667	0.311656	0.241815	0.388904	0.362618	0.908244	0.610459		2.95957			0.70965			0.91466	0.91715	0.913415	0.972345	0.861706	0.80095	0.885776	1.03999	0.822613		2.60573	24.6047	45.7924	0.745997	0.746483	0.409249	30.4958	10.0149	10.2325
	1.98073	0.287814	0.0126687	0.344291	0.383065	0.482425	0.206365	0.319732	0.0548551		2.27753			0.79016			0.95533	0.65985	1.07651	0.97525	0.931758	0.71463	0.691639	1.00596	0.967946		52.1748	12.5345	71.1385	24.7085	0.746483	2.3184	3.99345	6.22192	6.18745
	1.21485	0.0112786	1.3856	0.139348	0.339203	0.863623	0.357438	0.995106	1.2837		2.37593			0.85158			0.55942	0.7719	0.83	0.913913	0.903372	0.738866	0.594031	0.675454	0.858137		12.7379	0.961249	31.3206	12.5143	16.7791	17.4096	7.60189	10.2952	32.6602
	1.94358	0.257459	0.453657	0.00544158	0.0822495	0.778698	1.67192	0.865558	2.1286		1.02642			0.7055			0.664	0.59013	0.680517	0.983716	0.986455	0.840292	0.89225	0.982471	0.83		10.2647	5.19765	5.87921	34.9779	11.1422	0.409249	24.6888	20.7067	26.8188
	0.844328	1.06082	1.32129	0.578092	0.0861018	0.99313	0.647671	0.109934	2.18434		0.0126			0.71546			0.98853	0.67811	0.7304	1.12656	0.874903	0.792318	0.736708	0.783022	0.71131		19.9682	9.04673	8.77755	16.0947	7.01869	0.973205	0.717119	3.35443	9.35263
	0.62993	0.678109	0.163012	0.229402	0.173555	0.325748	1.64369	1.60051	0.884564		1.14503			0.70633			0.73787	0.769244	0.724092	0.865773	0.761359	0.83	0.708571	0.846849	0.796551		29.4882	39.6401	3.69757	10.4674	12.0578	7.1569	16.9097	36.8158	17.7785
	0.169531	0.251332	0.194838	0.961509	0.182949	1.32572	0.217995	0.281836	0.707193		1.53351			0.74368			0.73787	0.79265	0.736708	0.878472	0.857805	0.767999	0.783022	0.759699	0.735131		15.6887	18.4788	24.5164	7.42245	24.5997	21.8605	9.48134	1.14858	14.2784
	3.20374	0.630558	0.848374	0.294824	0.56196	0.286654	1.6518	0.439022	0.36121		0.416486			0.90055			0.71961	0.70882	1.0385	0.771734	0.849256	0.954749	0.940639	0.89225	0.973092		10.363	6.80392	11.4691	2.70222	22.0872	34.0188	2.28501	13.0153	31.9688
	0.401775	0.0828491	0.224349	0.633425	0.481467	0.764048	1.69612	0.309713	0.274961		0.365402			0.82336			0.7553	1.02588	0.889179	1.09112	0.705666	1.03086	0.939892	0.968361	0.664		2.75611	17.6605	8.06139	2.70222	12.0578	5.36699	19.7266	17.946	16.9194
	0.930652	0.178021	0.511686	0.75907	0.0125706	0.287918	1.17638	0.728809	1.87014		2.62725			0.77356			0.88976	1.00388	1.0546	1.00289	0.731562	0.99849	0.796551	0.890922	0.802776		41.4426	7.56952	21.1166	5.19178	17.4457	16.6251	13.8927	19.9286	0.654781
	1.86895	0.637033	0.501188	0.198526	0.53398	0.751877	0.569011	0.0412638	0.475217		3.2982			0.91964			0.7138	1.04331	0.612457	0.841122	0.866354	0.895902	0.736708	0.84328			9.75131	0.961249	36.8838	21.1372	0.746483	0.235548	6.09427	12.746	3.29224
	1.29143	0.554462	0.168468	1.3116	0.00520396	0.178709	1.00582	1.65924	0.957743		3.92293			1.01841			0.85158	0.83249	0.744925	1.05867	0.71463	0.901878	0.846849	0.84328			24.5185	10.9274	0.684779	14.797	24.4546	4.99919	15.5615	6.60218	25.9068
	0.302391	0.72935	2.05414	0.047568	0.488361	1.23448	0.188402	0.0526161	0.115151		4.74426			0.87067			0.98023	0.99185	0.968693	0.73372	0.667735	0.795306	0.981309	0.939477			4.13767	7.30144	4.3112	21.9923	15.9528	19.2045	8.48387	10.8218	9.64801
	0.0762606	1.01494	0.746501	0.581455	0.415115	0.431566	0.271686	0.543082	1.77552		5.49574			0.95948			1.07568	0.710397	0.858967	0.960891	1.00712	0.904036	0.763185	0.999486			3.89712	24.9237	27.2236	5.30478	3.26016	20.802	12.5095	0.486455	21.5952
	0.375177	0.63209	0.722414	0.372534	0.595138	0.436429	0.472731	1.06784	0.104112		6.55908			0.87731			0.98023	0.91798	0.664581	0.746087	0.921964	0.818795	0.798045	1.10249			0.497546	18.6114	0.658543	2.70222	6.20216	6.94539	61.4531	4.27956	3.28137
	0.628252	0.236294	0.110393	0.638622	0.729795	0.525079	0.0400804	0.361	0.392091		6.76636			0.90055			0.88727	0.86569	0.618682	0.675703	0.805764	0.93375	0.874903	0.71131			10.2257	11.7456	3.57785	10.8682	3.26016	21.015	2.41585	18.2339	4.98917
	0.551848	0.0834757	1.3441	1.26703	0.604841	0.695684	0.55416	1.27408	0.874156		5.89655			0.85573			1.09311	0.88229	0.846434	0.952923	0.788998	0.813483	0.852327	0.923458			7.92912	1.76506	6.36914	15.7327	12.2328	26.3295	3.49836	26.0737	20.8979
	0.00686103	1.69614	2.49625	1.37917	0.0652961	0.310544	1.00086	0.3664	0.25749		7.35282			1.03833			0.99351	0.89225	0.792235	0.899305	0.691639	0.77024	0.659933	0.861706			0.497546	2.91084	9.74882	4.54983	7.83408	8.00072	3.57484	17.1669	8.55877
	0.357565	1.53633	0.424962	0.39041	0.360046	0.415743	2.21982	0.150099	1.71393		6.18007			0.91881			0.79265	0.763185	0.755134	0.796219	0.746087	1.01169	0.868761	0.89308			29.486	10.3422	14.051	0.196218	11.3903	11.6531	10.4492	14.1356	8.78524
	1.03476	0.842276	0.407369	0.627257	1.45146	0.270164	3.1667	0.555571	0.925068		6.47731			0.95865			1.06904	0.830498	0.657609	0.831826	0.823775	0.772232	0.946366	0.873575			17.7385	15.5241	1.63207	3.37605	3.26016	17.0729	1.52527	5.85374	23.72
	1.22891	0.282047	0.0188684	0.36227	0.196413	1.019	1.68247	0.0661224	1.77635		4.11252			0.79846			0.9213	0.913415	0.80676	0.706081	0.991767	0.811657	0.963547	0.645906			7.35437	10.676	11.2301	0.196218	3.26016	6.61876	6.60484	11.1058	34.0885
	1.72413	0.842276	1.97449	0.636495	0.634604	0.682327	1.59904	0.792702	0.282342		2.5807			0.82585			0.9711	0.825352	0.74285	1.05659	0.843861	1.0468	1.037	1.02065			1.92825	17.6452	51.7729	1.59369	3.26016	9.78528	16.9113	9.94646	3.33285
	0.749083	1.23145	1.04771	0.994573	0.57618	0.0747513	0.152809	0.0990319	0.616724		2.08511			0.76775			1.12465	0.759699	0.84411	0.863532	0.898309	0.909431	1.0546	0.724092			22.6048	23.6542	53.09	0.196218	0.255498	27.9982	8.95732	3.32592	12.0911
	1.05519	0.528267	1.06888	0.637561	0.0998107	0.186878	1.09505	1.02895	0.286013		0.504614			0.72376			0.835146	0.630883	0.83415	0.74866	0.853738	0.794227	0.940639	1.00247			3.67896	21.0517	4.53589	0.196218	8.13011	7.93767	43.4747	14.4357	13.1327
	0.532757	2.89844	0.591666	0.696897	0.584605	1.41998	0.15263	5.16593	0.301132		0.708216			0.58598			0.910178	0.830498	0.86901	0.847928	0.863532	0.76775	0.92794	0.696619			10.7996	30.8081	9.08552	10.6877	15.0304	11.4323	25.0429	0.685242	2.46291
	0.52986	2.04282	0.0400387	0.481653	0.245638	0.728237	1.44117	0.80589	0.468032		1.3034			0.71463			1.07095	0.815309	0.75198	0.916984	0.866354	0.927276	0.954002	0.657609			0.778029	8.3991	28.5558	0.196218	26.0177	10.8206	19.0308	6.40468	5.43664
	0.266418	2.79026	0.134983	0.221285	0.682472	0.697924	0.00687404	0.447896	0.149161		2.58842			0.76775			0.817467	0.724756	0.71629	0.771734	0.832905	0.813483	0.830498	0.779121			12.8937	5.83533	6.84147	0.196218	20.4591	10.8206	19.6348	6.88313	3.49516
	0.3723	1.57848	0.790642	0.947388	1.22754	0.104917	1.39718	0.805931			3.0235			0.85739			0.92794	0.734218	0.71297	1.12399	1.07651	0.905862	0.802776	0.906277			6.22625	38.7227	4.78059	0.196218	1.78991	24.3885	9.09407	17.9464
	0.378182	0.45556	0.0122563	0.982421	0.399243	1.06683	0.450692	3.08101			4.45166			0.83415			0.983799	0.798294	0.89308	0.783105	0.847679	0.657609	0.744925	1.1122			3.22473	60.5241	3.21246	13.1963	1.78991	11.4323	12.511	18.0988
	0.675786	0.729528	0.0943527	0.69441	0.3623	0.364486	1.83724	0.289597			5.21486			0.87482			0.762936	0.734218	0.93209	0.637689	0.954749	0.757292	0.841454				43.4611	35.749	12.2366	0.196218	0.936401	7.52249	23.4932	21.1777
	0.201406	1.41199	1.22008	0.35559	0.342208	0.850223	0.638235	1.03789			6.3433			0.79846			0.783022	1.05642	1.01426	0.850252	0.911008	0.968361	0.779121				17.7511	45.6655	14.9632	0.196218	1.78991	1.78991	6.96019	1.44009
	0.650276	1.66172	1.15959	0.303574	0.839317	0.30548	1.62592	0.97923			5.17498			0.8466			0.83	0.695706	0.73621	0.851497	0.896068	0.784599	0.859465				1.53892	2.0589	12.7046	36.6737	9.55508	19.7434	37.1322	7.53161
	1.18358	0.0832442	0.364096	0.274154	0.0596271	0.578587	0.544752	1.84663			2.98479			0.71629			0.78352	0.553693	0.860793	0.811906	0.706745	0.800701	1.01733				19.3156	2.91084	10.787	0.196218	1.78991	3.1986	9.61497	30.0484
	1.34921	1.06848	1.31577	0.0306797	1.32865	0.0120662	0.352222	2.27997			1.63696			0.96612			0.999486	0.665328	0.96114	0.743016	0.702346	1.0712	0.678276				9.77102	30.7792	15.3965	1.38303	1.78991	10.4973	8.98902	16.9949
	0.0180046	0.0446076	0.689122	0.0786844	0.528867	0.557986	0.392928	0.430977			0.036985			0.95782			0.855564	0.686908	0.7553	0.882373	0.69388	1.07435	0.885776				19.7116	18.3397	6.20097	6.27144	3.17983	25.7524	0.170017	16.0622
	0.472668	0.218472	2.03057	0.968107	1.12125	0.116653	1.73203	0.0468183			3.68483			0.90968			1.15602	0.789579	0.67562	0.736459	0.678359	0.67313	0.71131				7.24951	14.2208	7.09286	5.89939	12.5742	20.1719	16.1106	27.2596
	1.51122	0.358617	1.30484	0.860187	0.300728	0.429436	0.731837	0.968337			5.75794			0.88312			0.967946	0.76526	0.911091	1.29953	0.909348	0.819293	0.981309				22.6888	20.4364	13.2662	0.588325	17.045	15.3109	5.54058	7.34664
	0.482575	0.659982	1.39007	0.315027	0.109532	0.787176	0.499708	0.643577			3.60756						0.801531	0.846434	0.87067	1.10506	1.01816	0.831826	0.832324				1.1874	29.3648	18.8734	4.93922	12.6754	33.0841	3.86336	19.8726
	0.257035	1.06321	0.306762	0.884153	1.48225	0.642411	0.0465898	0.856971			1.3235						0.840292	0.839296	0.78103	0.777793	0.853738	0.767252	1.05352				41.8245	8.85745	15.9961	23.3742	0.255498	22.8801	3.91735	16.8651
	0.886342	0.429919	1.21653	0.0612151	0.267674	0.179629	0.0214954	0.0594491			3.6271						0.846434	0.792816	0.87399	0.792816	0.724922	1.02405	0.798543				21.2947	42.0892	12.4633	21.2531	1.22288	29.6891	3.02942	48.5527
	1.25333	0.617482	0.368739	1.65642	0.0790708	0.784354	0.120901	0.139789			3.51214						0.627978	0.89391	0.816969	0.851497	0.89391	0.83					5.8925	5.21927	28.5722	25.8637	1.78991	3.94107	7.01306	13.4762
	0.582324	0.802852	0.506873	0.330042	0.0622196	0.640692	1.40477	0.135748			8.4722						0.684418	0.81008	0.751565	0.9047	0.890175	0.952757					26.5336	30.6167	8.17106	25.8637	1.78991	31.1473	13.8648	9.87836
	0.0173511	1.62833	0.201447	1.56647	0.473777	0.896289	0.431294	0.38442			6.65787						0.830996	0.705832	0.668565	0.846683	1.03601	0.996					18.26	15.9653	21.5482	2.51971	2.29571	4.36167	1.67563	11.1592
	0.222238	0.28614	0.583842	0.380862	0.2586	0.411554	0.54612	0.961432			5.64006						0.684418	1.04265	0.85407	0.957405	0.904036	0.709152					1.53892	1.38872	22.2064	13.5084	0.699643	23.9382	5.83334	6.99355
	0.31411	0.624077	1.09212	0.208766	0.98644	1.12205	1.29016	1.21846			2.40367						0.60424	1.05012	0.873575	0.777793	0.921715	0.92794					19.5738	8.07361	5.12356	23.3742	1.78991	22.5507	55.3224	13.8855
	0.0548859	0.252321	0.608089	0.325349	1.22754	0.343456	0.329563	0.50051			1.51537						0.872496	0.90968	1.08713	0.693465	0.76775	0.939477					10.1332	18.9143	13.0426	22.3691	6.36383	7.05145	46.6758	0.150778
	0.126091	0.495339	1.03808	0.576851	1.72271	0.726325	0.852737	0.145468			0.928372						0.761857	0.893246	0.904617	0.822945	0.921715	0.798543					29.0938	22.6392	17.4985	35.0993	1.78991	34.9487	51.6798	3.72711
	0.0214051	1.11074	0.542958	0.132897	0.218417	1.18465	0.152494	0.557245			5.50423						0.738866	0.89308	0.7304	1.0536	1.05908	0.802361					8.0951	14.5567	20.9784	35.0993	4.08052	28.6662	3.19348	2.71163
	0.195277	0.276083	0.0114094	0.230286	0.264162	0.195861	0.438546	0.456498			2.22152						0.748162	0.82253	0.932671	1.03377	0.99185	1.07759					14.6873	15.425	13.792	1.98208	3.28088	6.04636	13.8602	13.345
	0.348298	0.88105	0.00815682	1.17825	0.198583	0.941514	0.503745	0.848344			0.184509						0.872496	0.7719	0.758288	0.836474	0.705832	0.899886					7.3609	15.714	9.60442	5.68494	0.418476	10.81	4.06849	12.8438
	0.710457	1.25582	0.151365	0.157092	0.670169	0.11357	0.165456	0.462287			3.46142						0.839296	0.7055	0.705334	1.01866	0.837304	1.10979					5.4147	14.5567	23.2345	0.430787	3.28088	1.07866	4.20748	10.6335
	0.227713	0.180912	1.26904	1.39609	0.558012	0.605579	0.132348	0.200128			7.93625						0.761857	0.573945	0.706081	0.972345	0.818546	0.755134					24.6951	17.7903	3.11114	3.89556	35.3789	3.15774	21.7786	11.1592
	0.315187	0.0917374	0.127507	0.545177	1.02458	0.485686	0.0245976	0.238187			6.7543						0.815309	0.836391	0.709733	1.07361	0.80095	0.913					22.4525	18.8453	7.43274	2.28197	29.8459	15.1149	4.78626	4.61287
	0.532678	0.27525	0.464466	1.00895	0.25255	0.444585	1.1083	0.820387			5.8806						0.748162	0.724092	0.711642	1.19744	0.889179	0.889179					5.35795	24.7687	10.7195	4.92537	13.2889	9.15016	4.64951	38.509
	1.53333	0.578098	0.32007	0.46589	2.27177	0.353963	0.902407	0.589353			4.76226						0.880381	0.76526	0.69388	0.959231	0.867018	0.864777					18.1766	19.735	11.1663	5.29399	27.5086	13.1482	2.74649	9.9739
	0.179849	1.68143	0.610371	0.519709	1.5946	0.443015	0.668508	1.30091			0.494304						0.96529	0.933335	0.830498	0.954749	0.788749	0.857639					5.68913	0.248156	3.32836	15.5127	3.28088	3.46623	14.0758	4.09597
	1.53522	0.104627	1.78977	0.136429	0.523706	0.525113	0.477077	0.0577722			1.98055						1.23255	0.774639	0.675537	1.1083	0.896068						4.54337	6.958	3.64031	19.0082	53.8084	11.4754	20.961	13.5562
	0.270153	2.29992	0.97374	0.883602	0.192646	0.109352	0.29525				9.05287						1.01741	0.859465	0.625571	0.87565	0.798294						40.2633	12.5129	11.9233	6.69225	8.02905	4.82094	4.3092
	1.0586	1.42223	0.983205	1.03938	0.0234869	1.95498	0.3068				8.88203						0.89225	0.779121	0.701267	0.891254	0.835395						20.5995	5.60786	2.14208	35.8958	3.28088	20.8443	4.20748
	0.0360234	1.258	1.28456	0.520583	0.559464	3.54434	0.88178				5.82066						0.89806	0.809914	0.394831	0.929102	0.782607						6.66007	15.7723	12.3477	11.1628	25.0823	0.61939	7.68229
	0.349949	0.462078	3.10146	0.870463	0.232929	0.82468	0.535511				5.69993						1.02173	0.686825	0.6972	0.867018	0.771983						8.78117	12.0166	27.7731	4.11826	20.1453	19.6055	1.27974
	0.678626	1.80531	2.4451	1.19727	0.670528	0.424173	0.403812				5.54073						0.80178	0.742352	0.779951	0.839545	0.863698						7.11411	22.868	8.80292	13.9935	13.6255	24.8471	5.50095
	0.00240699	0.0649352	0.247465	0.361944	3.4044	0.150401	0.569753				3.61848						0.86569	0.847596	0.943876	0.940888	0.809582						5.21934	6.33379	11.7665	7.726	16.1194	38.67	25.7227
	0.705409	2.45386	1.36994	0.154528	0.0927404	1.18358	0.518249				2.96344						0.66566	0.631464	0.482645	1.1005	0.835146						25.1252	17.4896	14.9077	0.600983	0.410716	25.3945	17.5957
	0.148845	0.177772	0.976005	0.121519	0.352815	0.212535	0.0912174				1.85905						0.74534	0.7553	0.76526	1.03601	0.900135						6.36095	2.93168	14.4303	8.86134	0.410716	25.9656	26.6094
	0.329843	0.235797	1.78457	0.823135	0.14889	1.00749	0.0846523				4.49842						0.89142	0.581332	0.900882	0.933335	0.769244						14.5226	20.6063	1.03775	13.5956	0.410716	18.145	19.2717
	1.0604	0.430533	1.28547	0.363032	0.753302	0.347122	0.84288				4.76637						0.97525	0.656198	0.639183	0.716705	0.939477						46.5147	4.32577	21.7959	0.600983	9.59727	15.326	1.00658
	0.0665655	0.340434	1.95077	2.30907	0.656918	0.0942107	0.167278				2.47963						0.768912	0.752644	0.512525	0.77107	0.910178						49.9735	64.735	16.6124	5.79541	19.5897	14.6556	1.36767
	0.715893	0.898753	0.285249	2.70424	0.801792	0.192683	0.0145078				0.066427						0.76526	0.705583	0.772232	0.9047	0.930015						5.78801	39.2547	36.8372	8.86134	0.410716	19.0543	2.52734
	0.362906	0.255386	0.21714	0.636613	0.795694	0.186409					0.75666						0.91466	0.748162	0.810329	0.85075	0.996415						21.0295	25.091	5.80139	9.57361	7.84213	0.980554
	2.23591	0.386531	1.35509	0.256894	0.288485	0.362484											0.837304	0.700022	0.846683	0.798543	1.01741						34.771	9.31207	1.03775	7.726	0.410716	1.66146
	0.431638	0.717704	0.310245	0.380154	0.46809	0.177771											0.971847	0.655285	0.610299	0.859797	0.815309						23.2776	4.36688	1.03775	5.57073	4.35293	7.36212
	0.744086	0.232482	6.41846	1.14177	0.419527	1.48888											0.819293	0.748162	0.603161	0.844691	0.897064						35.6167	0.550904	6.74835	23.4346	13.3792	3.50907
	0.910139	0.2523	0.484248	1.07256	0.568727	1.82692											0.864777	0.71546	0.488372	0.747	0.810329						24.0068	23.6758	0.788426	0.600983	0.656029	1.06486
	0.58417	1.26013	0.537641	0.131186	0.474329	0.368962											0.939477	0.851497	0.779702	0.909431	0.833154						22.028	10.0109	9.70305	3.10325	0.656029	1.06486
	0.158902	1.34335	0.390215	0.360387	0.992922	0.224073											0.955164	0.975499	1.00372	0.817716	0.828755						16.9202	14.7049	0.788426	6.74808	0.656029	30.246
	0.294787	0.548919	0.740267	0.517647	0.803929	0.121095											0.900799	0.610299	1.02173	0.978736	0.929434						6.1192	11.4394	5.75817	0.376941	3.74167	32.7966
	0.205145	0.891824	0.183306	0.628903	1.34379	1.94349											0.852327	0.631049	1.04248	0.836474	0.798294						17.5237	65.6969	0.788426	2.34937	38.0027	0.177386
	1.90101	1.48752	0.983628	0.550273	1.1784	0.423542											0.859465	1.06572	0.93707	0.855564	1.04082						4.03507	25.3141	12.0158	7.80835	37.218	2.20856
	0.105883	0.24581	0.499	0.413762	0.557837	0.378316											0.857639	0.71048	0.91383	1.02522	0.767999						8.87352	15.3969	23.1686	9.34957	31.1044	3.03979
	0.534582	0.477627	2.51156	1.02628	0.718005	0.536157											0.859465	0.688485	0.7636	0.775801	0.781362						13.509	13.9875	10.2508	0.376941	0.656029	0.177386
	0.112022	0.822632	2.5324	1.06792	0.0127126	0.597058											0.923458	0.75198	1.01758	0.842118	0.921466						11.5998	6.88019	0.788426	8.50705	11.2294	38.4676
	1.61261	1.56476	2.58932	0.505634	0.26233	0.298914											0.974669	0.894408	0.86652	0.707658	0.918893						12.7413	10.3679	22.5898	0.376941	0.656029	37.0473
	0.929828	0.125948	4.29484	0.577848	0.745959	2.00092											0.889179	0.89806	0.85075	0.860046	0.954749						5.61625	21.9281	49.6025	12.4273	3.51994	28.6203
	0.273909	0.413244	1.81212	0.423182	0.267237	0.479753											0.864777	0.79514	0.97857	0.774307	0.948192						14.4911	13.4344	16.7338	2.98952	13.3792	10.4822
	0.37404	1.26885	0.180355	0.686783	0.110732	0.775391											0.82917	0.81008	1.0209	0.900882	0.89225						7.86843	5.43464	7.91345	6.74808	1.58994	0.177386
	0.621498	4.41349	0.691157	0.360933	0.138261	0.259342											0.70301	0.822945	1.1122	0.616939	0.652546						10.8041	50.4347	5.55207	0.376941	14.0359	0.177386
	1.87861	1.73996	0.490624	1.62775	2.10262	0.443585											0.60175	0.82917	0.82502	0.882373	0.823609						2.43642	3.18006	13.5128	0.376941	8.53122	5.61772
	0.50416	0.407603	1.7199	0.734152	2.68362	0.41776											0.867682	0.8134	0.8466	0.709152	0.845189						2.53333	19.3405	1.81414	0.376941	17.6459	0.177386
	2.40481	1.91495	0.826114	0.266741	1.43862	0.981477											0.75115	0.8051	0.708571	0.600588	0.721436						7.02591	48.3951	19.814	0.376941	26.5647	12.4422
	1.77053	0.0597584	1.97123	0.106205	0.0968823	0.745399											0.81672	0.7055	0.85158	0.810661	0.840043						8.87352	20.1736	9.92296	0.376941	14.7361	7.82256
	0.103205	0.732892	0.281006	0.237528	1.45243	0.884176											1.20516	0.83996	0.968361	0.796385	0.927525						5.32875	4.91851	22.0314	2.98952	16.9242	2.5663
	0.0410353	1.43897	1.05673	0.0027302	0.85772	1.36099											0.98438	0.58681	1.41681	0.875484	0.982471						13.9531	0.519808	23.7671	0.376941	14.0371	2.62813
	0.128339	2.23426	0.221505	1.4188	0.59473	1.16051											0.68558	0.81174	0.89806	0.775801	0.968361						7.42939	18.9202	2.60585	25.8185	20.3217	2.62813
	1.66028	1.42385	0.160847	1.26829	0.857729	0.992982											0.56689	0.62582	0.82917	0.735131	0.846849						19.8126	37.6374	25.3153	22.4553	12.9945	20.1537
	0.327748	1.49871	0.988963	0.272995	0.650081	1.17471											0.65155	0.70799	0.78103	0.825352	0.759699						17.0036	21.2816	5.33216	0.744059	0.000392437	34.9038
	0.464312	0.620341	0.485956	1.61527	0.511925												0.74534	0.79431	1.05908	0.784765	0.887021						13.7324	5.09373	5.33216	0.744059	0.000392437
	0.658885	0.526698	0.523695	1.04833	0.359569												0.74534	0.74202	0.7719	0.744593	0.915905						18.5531	11.1395	20.1312	9.56182	4.08697
	0.301919	1.32364	1.15502	0.623028	0.110566												0.81672	0.8798	0.83	0.765841	0.846434						14.0561	7.64483	5.33216	0.744059	3.57873
	0.995058	0.267271	0.210486	0.899989	1.00641												0.511861	0.784599	0.93624	0.824688							10.1717	27.5527	6.93262	0.744059	33.8267
	0.519794	0.360663	1.00907	0.69983	0.203139												0.77771	0.8798	0.91217	0.846434							5.77297	15.8697	11.9141	6.45763	5.5778
	0.171657	0.0407246	0.463367	1.76905	1.08684												0.895487	1.21429	0.89142	0.937402							29.2715	14.2238	8.34495	1.98361	12.403
	0.530022	1.07043	0.894697	0.803717	0.201025												0.773394	0.787421	0.94869	0.946366							20.6024	15.3108	5.33216	18.5477	11.7661
	0.672008	1.61379	0.484303	0.361729	0.0764597												0.771983	0.71961	0.85573	0.722681							6.56613	23.3952	13.1028	12.9345	71.6949
	1.08224	0.565044	0.748974	0.173417	1.14323												0.868346	0.7885	1.01758	0.798543							7.90888	27.1323	10.3019	15.3988	0.134766
	0.100157	0.605528	1.00626	0.818396	0.127461												0.736708	0.89308	0.86154	0.844691							36.3696	22.3687	0.758238	15.8404	17.9525
	0.126016	0.409542	0.314889	2.66455	0.882649												0.691805	0.80925	1.0956	0.939477							12.0415	2.61256	19.3684	10.9922	5.87754
	0.913234	0.234909	0.773546	0.152685	1.55172												0.68475	0.85075	0.7055	0.887187							10.1109	8.40536	5.33216	3.87029	27.6866
	0.488966	0.318521	0.606832	0.0510683	0.721725												0.851497	0.84162	1.05161	0.958069							4.5655	5.44174	1.38697	4.28312	25.6354
	0.144114	1.12466	2.17949	0.111177	1.36466												0.721685	1.09145	0.844608	0.927525							5.46136	8.40536	8.23828	10.2082	14.602
	0.62787	1.7987	3.26608	0.213859	0.673141												1.08066	0.99766	0.86403	0.779121							18.0669	9.09804	17.4831	9.85185	12.403
	1.52193	1.18917	0.0827384	2.37516	0.84886												0.87565	1.2201	0.5561	0.885776							29.4956	27.1323	8.02077	16.5197	7.63075
	0.771505	1.0055	1.32716	1.1929	0.12941												0.960144	0.94454	0.7055	0.786923							15.8963	12.6733	27.5169	12.4678	9.65331
	1.85663	3.40437	0.503417	0.339107	1.35607												0.968693	0.52207	0.80593	0.832324							23.9957	5.14333	0.951859	7.21743	7.78563
	1.33015	1.28201	0.077503	0.472653	0.423782												1.48778	0.60756	0.86652	0.900799							15.6929	33.5911	22.7533	6.66381	19.0991
	0.815751	0.741513	1.68303	0.606944	0.280331												1.22093	0.89225	1.17528	0.846434							16.4375	10.7427	11.8374	3.29902	21.0595
	1.51517	0.67187	1.32888	0.732014	1.03203												0.87731	0.81672	1.1454	0.822613							9.71621	18.7228	27.5169	8.4542	27.7063
	3.31317	1.12343	5.0571	0.104915	0.317197												0.8549	0.98521	0.622832	0.809914							34.3284	19.6576	63.1933	8.11307	18.244
	0.341363	2.52512	2.47142	0.205433	2.22107												0.88063	1.26409	0.603161	0.912585							27.6585	11.3214	14.3444	15.791	6.14921
	2.20451	1.41966	0.11073	0.792012	1.60002												1.12714	0.72625	0.692552	0.89391							26.8168	21.2342	24.5115	40.149	2.19496
	1.19163	0.0913226	0.584332	0.0160518	0.777429												0.92877	0.99932	0.960144	0.842782							39.2419	6.27786	50.8909	12.1351	10.4958
	0.429618	0.152132	3.11914	0.140538	0.48534												1.1122	0.918893	0.757292	0.859465							11.1301	78.1228	44.0482	9.14843	12.9953
	1.46952	1.57621	3.46689	1.30116	1.27875												1.15785	0.716373	1.01418	0.989858							1.72978	64.4159	3.3378	25.8765	38.4688
	0.851393	4.03014	0.2953	0.887251	0.0473789												0.8134	0.774722	0.944955	1.00247							28.01	57.8253	14.9881	16.4945	8.72175
	0.436397	1.57457	0.3419	0.0401687	0.451656												0.79265	0.92794	1.01061	0.9296							14.8695	17.8677	24.2493	3.58587	10.1139
	0.0652727	1.91825	1.69401	1.24509	0.673104												0.8549	0.720274	0.852327	0.89391							6.79762	70.0112	35.9181	19.1236	0.159155
	0.851972	0.399681	2.05122	0.171083	0.786595												0.88644	0.897811	0.666324	1.09834							22.4944	46.7234	30.8076	18.2136	37.2462
	1.08541	0.479993	0.3724	0.282184	1.18447												0.67977	0.7553	0.669146	0.946366							39.8535	28.7905	44.0482	6.26546	20.3969
	1.56885	0.0309115	0.210028	0.346471	1.28425												0.85407	0.826846	0.722681	0.913415							17.5222	2.61256	28.1028	8.60277	3.52562
	0.372746	0.477336	0.602492	1.05314	0.241275												0.72874	0.762936	0.695706	0.952757							13.0215	8.16191	15.7474	20.8427	10.6251
	0.0929672	0.454533	1.90536	0.678461	0.238566												0.83664	0.738866	0.761027	0.868346							7.04308	11.8772	13.4807	0.859557	3.02068
	1.24334	1.4667	1.50647	0.908323	0.298453												0.8715	0.736874	0.855564								28.9257	41.4817	20.3919	20.8427	18.2758
	1.79077	0.150447	0.291195	0.339109	0.596848												0.67313	0.708239	0.84079								36.4653	5.66039	21.2541	14.2521	7.97095
	1.6245	0.25546	0.434979	2.08845	0.0497207												0.9545	0.594197	0.6972								10.2102	3.75524	17.522	15.791	15.1638
	0.722672	0.816293	0.187117	0.537775	0.113666												0.83332	0.645574	0.985791								31.8496	11.7759	0.00354773	15.791	37.7969
	2.10496	1.68627	1.34844	0.177594	0.408597												0.88312	0.741522	0.639183								17.6342	3.66723	32.9088	0.859557	7.2343
	1.41702	1.84998	0.912823	0.535477	0.371927												0.88312	0.651218	1.08713								14.8572	7.9977	37.8785	10.6445	2.65244
	0.108854	0.326647	0.353508	0.556483	0.976666												0.98355	0.794476	1.09834								17.1071	1.13793	25.4669	17.6433	8.49045
	0.28468	0.517402	0.415626	0.542652	1.67537												1.04082	0.612706	0.759699								15.7171	8.84022	26.5686	4.63005	12.1685
	1.51105	0.951124	0.622386	0.18739	0.453489												0.92628	0.68724	0.743846								18.978	20.3368	7.12147	10.4384	14.5711
	0.121844	0.686825	0.0410696	0.625015	1.15584												0.84245	0.639183	0.946366								18.978	10.8001	40.361	19.4042	2.81949
	0.0296926	0.612455	0.433376	0.000174349	0.83416												0.94537	0.77107									0.543072	26.1814	22.7518	20.3512	0.360346
	0.143075	0.580574	0.651642	0.993492	0.954612												0.9379	0.818795									29.9008	6.22827	3.6403	1.45022	8.17042
	1.27424	0.389996	0.49336	0.481124	1.60594												0.80925	0.7553									9.63335	1.46463	11.3284	43.5498	12.6343
	0.101183	0.233951	1.10476	0.587027	2.43253												0.70467	0.645325									27.1081	1.46463	5.89269	18.7746	3.45373
	1.6198	0.486708	0.619985	2.18085	0.233857												0.89474	0.7553									12.8494	7.90892	21.0036	6.02414	2.65244
	1.40896	0.269299	1.35369	1.98497	0.115754												0.8715	0.76526									7.05157	7.19276	17.9832	1.56257	7.07019
	1.10619	1.40809	0.354808	0.286031	0.539489												0.68973	0.644578									13.4932	8.13535	34.9478	15.4865	22.7405
	1.86004	0.0706647	1.88896	0.124548	0.712142												0.777793	0.981309									44.4569	1.5534	52.317	3.93977	12.249
	0.948847	0.131064	0.996047	0.292333	0.19301												0.82585										2.31933	1.309	20.2471	5.6748	15.8999
	0.0645038	0.405777	0.692545	0.389572	0.185008												0.98106										39.6933	5.87801	41.5383	11.5444	6.11033
	0.247814	0.431512	1.07748	0.281536	0.128973												0.90968										24.8031	8.39618	30.1937	15.8693	8.02516
	1.20344	0.643928	0.0475285	0.236537	0.13492												0.86154										2.46972	6.31705	13.0472	3.20756	0.399733
	1.58263	0.985228	0.872996	0.143831	0.715424												0.7553										21.2583	18.2527	0.447504	7.47017	10.4887
	0.273971	0.238151	0.690959	0.525907	1.33057												1.03293										15.8465	39.0479	18.1887	30.8107	12.6679
	1.17592	0.650186	0.119578	0.231787	1.13873												1.47325										9.94841	33.9843	4.26348	36.599	29.6513
	0.693859	2.93332	0.649569	0.0667073	0.0990785												0.83166										8.67318	55.1691	27.0157	14.3984	11.4063
	0.295409	0.545675	0.973142	0.0519156	0.816836												1.03335										27.3542	4.489	2.29869	10.4392	1.64984
	0.738416	0.50079	3.81504	1.31477	0.831524												0.996										11.9857	14.8011	40.4992	13.6911	40.5012
	0.695925	1.0636	2.48061	0.462325	0.0349365												1.7181										10.0054	7.39967	27.6573	13.5857	3.68763
	1.51872	0.663816	2.11088	0.435034	2.84564												0.94371										17.8919	21.843	33.9652	2.83468	0.399733
	1.46777	0.210442	0.685634	0.433326	1.8346												1.10722										8.20309	27.2705	29.3297	12.1837	18.0335
	0.155279	0.63847	1.23655	0.232713	0.80236												0.86154										6.30214	50.519	22.7834	14.4873	30.3804
	0.139486	0.407704	3.0434	0.35121	0.288985												0.594031										5.01481	22.0761	34.5769	1.93492	11.7097
	0.331123	4.2081	0.92741	0.495431	0.147002												1.10224										1.82797	10.8292	33.2749	12.7895	0.399733
	0.576246	1.12823	0.192158	0.612903	0.530282												1.10639										0.774594	17.3124	6.29466	6.98039	16.1523
	0.124703	1.09319	4.05562	0.431098	1.25291												0.89225										3.61237	4.489	3.78164	3.81749	13.1888
	0.0849893	0.983033	3.03619	1.51591	0.148316												0.920968										2.74595	26.4748	18.0653	17.5538	4.2785
	0.0150489	1.24387	4.05486	0.288759	0.693871												0.709152										11.5645	6.97855	6.29466	5.64545	3.33155
	0.352396	0.922122	2.01164	0.218997	0.837001												1.04862										12.6123	2.2864	2.59761	10.3333	11.7369
	0.527707	0.915971	1.764	1.12301	0.850484												1.04431										1.03444	19.2605	3.82122	17.0746	26.3265
	1.17482	1.63991	0.273953	1.06106	0.156614												0.919142										7.26231	34.7454	34.8024	38.6428	6.87243
	0.31943	1.39532	2.2862	0.0961399	0.427316												1.06655										1.03444	4.489	13.6211	16.903	8.14194
	0.534546	0.492123	2.38273	1.14652	0.165948												0.882788										4.18104	4.489	8.55745	21.9291	11.8084
	1.77384	1.65698	1.44419	0.451171	0.176838												0.86901										13.1379	24.8668	2.95128	22.2524	1.58069
	0.165741	1.49597	1.47832	0.334691	0.31219												0.846683										6.599	24.8668	7.5402	21.0071	3.14183
	0.0607198	1.87327	1.67785	2.04039	0.0554889												0.989941										18.1551	13.5856	2.76465	18.886	27.9972
	0.512864	2.34404	1.04529	0.48118	0.142093												0.918644										0.777725	5.06401	18.8501	0.187241	14.6726
	0.543769	0.593698	1.65364	0.591711	0.0368197												0.840043										4.588	22.9435	28.4877	0.187241	26.7783
	0.0218923	1.76096	0.129428	0.131077	0.148316												0.717369										0.777725	12.3417	12.8906	2.7898	6.87243
	0.325586	0.406253	0.532318	0.175086	0.0643724												0.753723										27.8306	17.7448	29.4336	20.3688	0.586148
	0.12693	1.15205	0.0908851	0.13718	0.441482												0.793812										27.3428	1.69577	26.5003	3.3891	3.61316
	0.586468	0.122954	0.543145	0.195225	0.0374985												1.02497										1.82608	1.48089	28.9229	11.9075	14.1044
	0.664161	3.70786	0.563887	0.306976	0.47505												0.772232										17.6572	29.7327	42.0068	3.76358	13.5119
	0.554172	0.765103	0.399137	0.729569	0.183478												0.964626										4.1946	8.03439	38.3268	3.36707	1.21625
	0.963014	1.40182	0.785428	1.24276	1.17463												0.882788										0.777725	32.6583	13.5979	9.15987	8.22596
	1.22461	0.82487	0.324057	0.520849	0.63903												0.898973										0.777725	4.87243	3.6352	7.95241	2.49061
	1.84697	0.096231	0.333597	0.710921	0.203617												0.728906										11.3971	20.1049	18.5082	19.2528	32.5231
	0.401331	0.342015	0.278406	0.367463	1.5768												0.817467										0.777725	20.1034	21.7865	3.17922	3.69914
	0.285139	1.08103	0.331102	0.666573	0.245059																						22.4216	0.0595822	7.28133	17.3383	10.245
	1.32026	0.852187	1.10493	1.76883																							16.5791	42.5627	40.278	17.1668
	1.21769	0.359651		0.172577																							3.5054	4.44746		20.0376
	0.182507	0.376432		0.383737																							0.777725	14.215		3.5537
	0.390734	0.342935		1.21285																							10.4466	22.4627		28.8674
	0.335476	1.1578		0.5456																							26.2543	13.6363		6.15295
	0.0411694	0.0825429		3.6631																							11.5743	21.6361		14.6575
	0.564558	0.572034		0.638018																							1.81819	5.33915		13.669
	1.88992	0.97652		0.877855																							18.7457	2.32636		5.53732
	0.330175	0.611944		0.656258																							39.2236	27.7422		6.16692
	0.0826251	0.721958		0.362935																							1.81819	35.079		18.2617
	0.345003	0.432216		0.195241																							9.58336	20.6057		10.611
	0.517523	0.435132		0.0740679																							0.784373	2.07234		7.95683
	1.69109	0.714119		0.380422																							1.81819	13.2804		2.89959
	1.32502			1.40671																							0.908122			3.6408
	1.5051			0.619841																							1.81819			3.53974
	2.54896			0.995284																							10.7908			0.173273
	1.10641			1.45266																							1.81819			22.6604
	1.67528			1.09895																							27.0193			22.4466
	0.252474			2.11344																							4.30774			9.69254
	0.249848			0.338127																							1.81819			14.5703
	0.0816285			0.448047																							4.42075			17.6988
	0.0898645			0.032589																							6.05459			9.28905
	0.462859			0.172776																							12.123			4.59037
	1.63842			1.0477																							3.15155			21.0277
	0.999226			0.242112																							24.105			20.6785
	0.012609			1.17017																							17.6057			21.6276
	1.26808			0.143355																							4.8516			4.72065
	0.663125			0.0854524																							6.10084			1.91228
	0.151672			0.412287																							4.80418			1.91228
	0.353816			0.194842																							15.3538			4.12573
	1.19206			0.552024																							8.9594			7.17249
	0.662989			1.06285																							19.3414			7.30333
	2.64384			0.839079																							12.5893			12.2735
	3.69434			0.727796																							10.783			12.2722
	1.17841			0.370398																							16.8518			40.7796
	1.20711			0.0593653																							24.4398			26.7434
	1.24801			1.21477																							51.2186			36.334
	0.312638			0.0293168																							18.5336			1.72894
	0.629362			1.46915																							10.7722			1.41124
	1.33271			1.14869																							16.6192			27.6491
	0.13613			0.310602																							6.21861			2.4216
	0.848913			0.424168																							12.0882			17.7034
	0.694683																										2.10638
	1.17432																										24.5569
	0.56847																										4.84166
	0.403303																										1.56936
	0.148525																										1.56936
	1.23413																										21.9481
	0.869848																										1.56936
	0.996033																										2.93192
	0.0586942																										9.21626
	0.214053																										1.56936
	3.31287																										9.14256
	0.680624																										7.58968
	0.0479253																										16.1018
	0.339263																										1.56936
	0.456504																										17.2775
	1.80678																										17.0964
	0.257999																										1.56936
	1.86545																										9.69946
	1.43266																										1.90061
	0.396252																										9.16212
	0.130893																										1.56936

## Sheet: Figure 3
Figure 3C	ctrl		ctrl		ctrl		ctrl		ctrl		ctrl		ctrl		ctrl		ctrl		ctrl		ctrl		ctrl		ctrl		ctrl		ctrl		ctrl		ctrl		Figure 3D	opto		ctrl		Figure 3E	opto	ctrl	Figure 3G	opto	ctrl	Figure 3H	opto	ctrl	Figure 3I
	x pole coord	y pole coord	x pole coord	y pole coord	x pole coord	y pole coord	x pole coord	y pole coord	x pole coord	y pole coord	x pole coord	y pole coord	x pole coord	y pole coord	x pole coord	y pole coord	x pole coord	y pole coord	x pole coord	y pole coord	x pole coord	y pole coord	x pole coord	y pole coord	x pole coord	y pole coord	x pole coord	y pole coord	x pole coord	y pole coord	x pole coord	y pole coord	x pole coord	y pole coord		Time (s)	No. of spots	Time (s)	No. of spots	n (measurement)	23	17	n (measurement)	23	17	n (measurement)	6	9	n (measurement)
	11.667	0.667	23.333	32.667	15.667	6	8.333	45.333	13.667	21.667	51.667	17.333	55	14.5	34	12.5	38	15.667	14	21.5	31.5	22.5	8.5	23.5	21	17.333	31.333	18.333	13.5	18.5	20.333	20	39.333	21.333		105	3	183	8		EB3 spot velocity (µm/min)	EB3 spot velocity (µm/min)		Half-overlap length (µm)	Half-overlap length (µm)		Plate width (µm)	Plate width (µm)
	11.333	108	17	170	16	134	10	181	12	153.333	49	131	53.5	130.5	36	150.5	34.333	152.333	14.5	150	37.5	151	4	152	19	146.667	39.333	131.667	20	131	19.333	139.667	43	134.667		61.5	2	274.5	10		24.4276	15.0276		3.685	0.998		5.9	3.067
	x EB coord	y EB coord	x EB coord	y EB coord	x EB coord	y EB coord	x EB coord	y EB coord	x EB coord	y EB coord	x EB coord	y EB coord	x EB coord	y EB coord	x EB coord	y EB coord	x EB coord	y EB coord	x EB coord	y EB coord	x EB coord	y EB coord	x EB coord	y EB coord	x EB coord	y EB coord	x EB coord	y EB coord	x EB coord	y EB coord	x EB coord	y EB coord	x EB coord	y EB coord		54	3	156	4		25.4442	17.215		1.86	0.963		6.3	2.833
	19.01	27.089	62	81.667	10.024	52.819	36.25	93.75	43	78.667	39.667	51.667	30	59.5	27.667	95.333	22.667	103.333	25.667	77.333	20	109.333	36.667	73.667	18	67	17.5	75.25	21	63	24.75	71	19.333	73.667		120	2	145.5	5		24.5814	24.1557		1.71	1.927		8.65	3.367
	18.218	31.05	62	87.667	8.675	56.289	36.5	98.5	41.333	85.667	37.667	58.333	28.25	69	27	87	23.667	96.333	24	82	20.333	104.667	37.667	77.667	18	72.333	18.75	78	22	68	25	74.75	20.667	69.667		54	1	208.5	5		24.4318	23.6285		0.9	2.682		5.15	4.45
	17.109	30.574	64.333	91.667	10.024	64.964	36.5	104.25	38	90.667	38.333	62	29.25	77.75	27	82	24	90.333	25.667	89.667	20.333	98.667	37.667	80	18.667	74.667	20.5	80.25	20.667	74.667	25.5	76.5	21.667	66.333		102	3	115.5	3		16.5189	23.8359		3.095	2.166		5.725	5.467
	15.842	34.376	66.667	96.667	10.795	71.518	37	110	38	92	37.667	68.333	29.5	82.25	26.667	74	24.333	84.667	27	93.333	21.667	93.333	37.667	84.667	19	79.667	22.75	86.5	20.333	80.333	26	80.75	21.333	62		91.5	3	147	4		20.3471	12.3204		3.66	1.651		7.55	5.4
	15.683	38.653	69	99	11.373	76.723	37.25	116.5	30.333	99	36	72.333	31.5	90	27.333	66.333	25.667	79.667	27.667	98	20	90.667	38.333	89.333	19.667	85	25.75	92.25	19.333	83.667	26.5	82.5	22	59.667		72	4	205.5	6		18.3118	24.0037		1.41	1.41			2.475
	15.05	41.663	70.667	102	12.53	82.12	35	123	28.667	106	36.333	78.667			31.667	57	26	74.667	27.333	100.667	19.667	85.333	39	92.667	20.333	86	28	98.25	18	87.333	25.5	85.25	21	58.333		99	4	102	2		11.5687	30.8329		1.755	2.03			3.333
	14.416	45.941	73.667	105.333	13.687	88.867	33.25	128	28	110.333	39.333	87.333					26.333	69.667	29.667	108.333	19.333	80	40.667	94.333	20	92	29.5	102.25	17.333	90.667	26	87.75	23.667	53.667		66	1				16.1129	18.7562		2.271	1.96			3.933
	14.574	50.059	73.333	108.333			31.25	135.75									26.333	69			18.667	77.667	42	99.333	20.667	94.333			17	95	27	91									19.5936	20.8379		2.063	2.4
	12.356	54.495					30.75	141									26.333	66			19	73	43.667	105.667	22	98															20.4735	17.3339		1.474	1.65
	12.99	61.465																			19.667	70.333	45.333	114	24	102.667															20.2345	18.3348		2.502	2.2
	11.406	64.634																							25.667	105															21.0703	15.5062		4.075	1.1
	11.406	69.228																																							19.3593	19.6977		1.934	2.43
	10.455	73.03																																							19.8321	18.428		4.218	1.91
	9.188	74.931																																							23.7237	11.5006		2.089	1.14
																																									18.0598	13.6428		4.45	2.05
	opto		opto		opto		opto		opto		opto		opto		opto		opto		opto		opto		opto		opto		opto		opto		opto		opto								13.0587			2.4
	x pole coord	y pole coord	x pole coord	y pole coord	x pole coord	y pole coord	x pole coord	y pole coord	x pole coord	y pole coord	x pole coord	y pole coord	x pole coord	y pole coord	x pole coord	y pole coord	x pole coord	y pole coord	x pole coord	y pole coord	x pole coord	y pole coord	x pole coord	y pole coord	x pole coord	y pole coord	x pole coord	y pole coord	x pole coord	y pole coord	x pole coord	y pole coord	x pole coord	y pole coord							20.6985			1.693
	23	15.667	14	33	1.25	2.75	60	28.5	21.333	2.667	15	14	63.5	34	13	1.333	4	2.5	15.5	32.5	62	35.5	14.667	1.667	17	1.333	29	14.333	68	17.667	50.5	17.5	4.333	18							21.1697			3.5
	19	127.333	15	148	1.5	109.75	70.5	145	26	120	22	137	59.5	152.5	5.667	114.333	5.5	114.5	12	147.5	62.5	136.5	10	103	9.667	100.667	15.667	144	58.333	139.667	56	141	18.333	153.333							13.6267			2.76
	x EB coord	y EB coord	x EB coord	y EB coord	x EB coord	y EB coord	x EB coord	y EB coord	x EB coord	y EB coord	x EB coord	y EB coord	x EB coord	y EB coord	x EB coord	y EB coord	x EB coord	y EB coord	x EB coord	y EB coord	x EB coord	y EB coord	x EB coord	y EB coord	x EB coord	y EB coord	x EB coord	y EB coord	x EB coord	y EB coord	x EB coord	y EB coord	x EB coord	y EB coord							18.7826			3.7
	14.613	24.292	42.333	73.333	35.708	77.031	34.5	105.5	24.462	42.55	24.988	45.529	18.333	89.667	21.774	25.484	24	39.5	39.333	69.333	18	109.667	22.059	17.059	3.07	64.474	56.333	70.667	53.75	71.5	38.25	63.75	23.333	100							19.2327			1.63
	11.577	30.745	44	76.333	36.02	72.664	30	96	23.773	44.79	25.2	50.612	16	94.333	20.806	29.032	23.833	41.5	39.333	74	16.333	105.333	23.088	21.324	6.14	57.895	55.667	78	52.25	76.5	39.5	71.75	22.667	92.333
	12.146	36.818	42.333	87	37.424	66.895	27	88.25	22.739	51.853	23.718	57.388	15.667	97.333	19.677	32.581	22.833	44.833	38.667	79.333	17	100.333	22.5	23.971	5.702	55.263	55	81.667	52	79.75	41	78	23	82.333
	11.956	44.219	42.333	91.667	39.295	61.281	24.5	83.5	21.706	56.16	22.235	63.953	16	103	16.129	36.29	22.833	48	37.667	83	16.333	94.667	24.265	29.853	7.895	49.561	55	87	50.5	83.5	42.5	81.75	22.667	74.333
	11.577	51.431	44	97	40.231	56.136	23	80.25	21.878	60.639	22.871	65.012	16.333	107.333	12.903	46.613	23.667	54.5	37.667	84	13.667	89.667	21.471	36.765	7.602	43.713	54.333	92.333	50.75	88.5	42.75	85.25	22.667	69.667
	10.628	57.314	45.333	104	41.166	47.092	23.75	76.75	21.361	62.361	23.082	70.306			11.935	50.645	24.833	58.167	37.667	92	14	83.333	21.471	42.353	9.795	38.304	55.667	96	53.75	95.5	43.5	93.25	23	67
	11.197	61.679	47.667	112	41.01	40.542	24	70.75	21.534	65.979	24.776	72.635			11.452	49.677	26	62	37.333	96	15	78.667	24.118	48.088	11.55	33.48	54	99.667	54.75	102.25	43.5	99	22.667	63.667
	10.058	69.839	48.667	117					20.155	72.697	24.776	77.082			10.968	48.387	27.5	67.333	36	103	15.333	74	27.794	53.971	13.45	28.801			55.25	106.5	43.5	103.75	23	57.333
	10.438	74.774							20.845	74.592	24.776	82.376			10.323	52.258	29.667	71.833					28.824	58.382	15.351	23.246			55.5	115			24.333	53.667
	8.35	81.606							21.361	79.588	27.318	86.612			10.645	56.129	29.333	75.667					28.971	62.059	15.643	17.251							24.333	48.667
	8.161	86.161									27.318	92.753			11.129	54.032	30	79.333							17.251	13.743							25.667	43.333
	6.073	96.599									29.012	97.835			13.71	59.839																	26	39.333
	5.314	100.774									29.012	102.918			13.548	60
	3.226	102.861									27.741	111.6			12.903	61.935
															14.516	64.839
															15	67.742
															16.452	71.452
	opto		opto		opto		opto		opto		opto
	x pole coord	y pole coord	x pole coord	y pole coord	x pole coord	y pole coord	x pole coord	y pole coord	x pole coord	y pole coord	x pole coord	y pole coord
	13	21.333	22.5	17	21.5	14	27.667	15.333	52	24	8.333	16
	18.667	127	26	144	13	139	31	130.333	49	142	6.667	130.333
	x EB coord	y EB coord	x EB coord	y EB coord	x EB coord	y EB coord	x EB coord	y EB coord	x EB coord	y EB coord	x EB coord	y EB coord
	19.25	68.25	29.667	57	23	85	12.333	56.333	12.5	77.167	13.5	87.5
	20.25	71	28.667	60.667	21.5	79.25	11.333	59.667	12.667	84	13.25	81.5
	20.75	76.5	25.333	64.333	22.5	72	11.333	63	12.833	87.333	15.5	75.75
	21	78.25	23	68.333	23	68	11.333	64	13.833	91	17.75	71
	21.25	80	20.667	73	24.25	63.5	11.667	67.333	13.167	95	17.5	68
	22	83	18.333	76.333	23	60	13	71.667	15.5	101.667	18.75	63.5
	22.25	86.5	15.333	80	25.25	53.5	14	74	15	104.667	19.5	61
	23.25	90.75	14.333	85.667	25.75	49.25	16	80	14.5	110.167	22.25	55
			13	94.667	25.75	42.75	17	83.333	14.667	114.667
			11	99.667			16.667	87.667	15.333	119.333
							17.333	88
							19.333	94
[truncated: 2 more columns]

## Sheet: Figure 4
Figure 4G		opto			ctrl		Figure 4H		opto			ctrl
	t=0	t=20	t=30	t=0	t=20	t=30		t=0	t=20	t=30	t=0	t=20	t=30
	Bridge tubulin int. (a.u.)	Bridge tubulin int. (a.u.)	Bridge tubulin int. (a.u.)	Bridge tubulin int. (a.u.)	Bridge tubulin int. (a.u.)	Bridge tubulin int. (a.u.)	n (measurement)	22	19	11	19	10	8
	mean	mean	mean	mean	mean	mean		K-fiber tubulin int. (a.u.)	K-fiber tubulin int. (a.u.)	K-fiber tubulin int. (a.u.)	K-fiber tubulin int. (a.u.)	K-fiber tubulin int. (a.u.)	K-fiber tubulin int. (a.u.)
	254.341	104.607	138.412	261.148	245.793	211.847		457.314	334.312	199.534	301.965	380.964	274.41
	sd	sd	sd	sd	sd	sd		393.041	423.945	206.449	990.667	170.676	242.986
	199.5	75.301	108.304	200.181	209.852	150.238		157.943	119.024	230.263	240.68	120.01	142.508
	sem	sem	sem	sem	sem	sem		244.664	542.842	114.605	112.03	304.723	13.9887
	42.5372	17.2709	32.6216	45.913	66.4089	53.0876		181.421	211.413	174.785	383.742	96.3924	269.731
		opto			ctrl			93.614	713.699	65.7192	223.592	166.091	334.567
	t=0	t=20	t=30	t=0	t=20	t=30		16.604	302.106	380.511	388.776	625.694	390.06
	No. Microtubules	No. Microtubules	No. Microtubules	No. Microtubules	No. Microtubules	No. Microtubules		192.138	267.899	409.764	245.146	96.153	85.269
	13.6351	5.60791	7.42016	14	13.1768	11.357		423.948	330.246	75.1895	209.367	339.334
	sem	sem	sem	sem	sem	sem		422.579	307.481	121.47	200.472	326.165
	2.2804	0.925882	1.74883	2.46137	3.56014	2.84599		259.834	114.834	208.167	468.292
								169.906	335.185		219.541
								148.85	584.453		250.68
								59.132	142.993		158.846
								30.6345	187.244		434.348
								45.0583	252.142		602.058
								397.077	379.784		150.56
								172.276	384.026		311.922
								565.563	449.789		237.978
								389.579
								87.5138
								442.986

## Sheet: Figure 5
Figure 5C	opto		untreated	PRC1 siRNA	opto		untreated	PRC1 siRNA	Figure 5D	opto				untreated		PRC1 siRNA		Figure 5F,G	mock siRNA	mock siRNA	Kif4A siRNA	Kif4A siRNA	Kif18A siRNA	Kif18A siRNA
	t=0	t=12			t=0	t=12				t=0		t=20						n (measurement)	26	6	57	13	47	14
n (measurement)	54	32	72	58	57	28	121	89	N (cell)	6		6		8		6			PRC1-GFP overlap length (µm)	Spindle length (µm)	PRC1-GFP overlap length (µm)	Spindle length (µm)	PRC1-GFP overlap length (µm)	Spindle length (µm)
	Norm. bridge Kif4A int.	Norm. bridge Kif4A int.	Norm. bridge Kif4A int.	Norm. bridge Kif4A int.	Norm. bridge Kif18A int.	Norm. bridge Kif18A int.	Norm. bridge Kif18A int.	Norm. bridge Kif18A int.		Norm. bridge MKLP1 int.		Norm. bridge MKLP1 int.		Norm. bridge MKLP1 int.		Norm. bridge MKLP1 int.			4.8081	12.087	4.6578	12.077	7.3623	15.701
	0.306706	0.0238828	0.723773	0.350739	0.271394	0.512359	0.285627	0.100112		1.69443		0		1.17048		0.022562			4.9082	12.125	4.4074	13.078	8.6144	15.749
	0.343997	0.0494417	1.34129	0.477616	0.944807	0.869812	0.0220613	1.66212		0.586469		0.151324		2.3383		0.611379			6.1102	11.483	8.1136	13.516	7.3623	15.927
	0.117738	0.0481847	0.93043	0.173659	0.174885	0.623007	1.36479	1.09371		0.602252		0.0707198		0.701745		0.297691			5.7105	12.512	5.8097	12.291	5.6093	15.182
	1.85042	0.0557266	0.555308	0.51983	0.737957	0.863973	0	2.10017		0.757514		0.298537		0.268754		0			5.0938	11.419	5.0585	13.62	6.2604	16.394
	0.964113	0.0473467	0.890096	0.294819	2.75543	0.736421	0.387577	1.1156		0.919349		0.00642871		1.09303		0			5.1085	12.332	5.6094	15.672	6.1603	12.853
	0.689628	0.151782	0.769955	0.578987	1.36312	0.698923	0.476491	0.89599		1.43998		0.224324		0.842493		0.100107			4.1576		7.4624	13.67	7.2622	11.028
	1.09453	0.153583	0.46733	0.545075	0.812337	0.185949	0.564235	1.08034						0.671945					4.2071		5.6594	13.106	4.808	18.773
	2.81497	0.103052	0.797915	0.270018	0.543095	2.41673	0.581616	0.625071						0.913264					6.9112		5.7597	12.674	6.1102	19.116
	1.91157	0.0278005	0.668323	0.55087	3.28162	0.161361	0.271421	0											5.5092		6.01	11.943	6.4107	13.771
	1.8376	0.0713971	0.640757	0.48845	1.14151	0.524346	0.165293	0.117326	n (measurement)	25		20		29		20			4.3072		6.7613	14.821	5.2588	16.811
	0.38883	0	0.898724	0.685944	2.43547	0.334709	0.91872	0.0513093		Bridge MKLP1 int. (a.u.)	Cytoplasm int. (a.u.)	Bridge MKLP1 int. (a.u.)	Cytoplasm int. (a.u.)	Bridge MKLP1 int. (a.u.)	Cytoplasm int. (a.u.)	Bridge MKLP1 int. (a.u.)	Cytoplasm int. (a.u.)		4.0568		7.212	11.852	6.9115	18.105
	0.907967	0.197348	0.606	0.378647	1.63236	0.249879	0.613706	1.10357		586.48	460.259	429.76	454.906	1.375	0.63	1.3906	1.3591		4.5075		4.157	13.238	5.9098	13.957
	0.525423	0.355729	0.496327	0.256208	1.87978	0.212074	0.205404	1.49014		609.56		490.6		1.5938		1.5781			3.8564		5.8597		6.5609	15.77
	0.596233	0.173465	0.90422	0.506646	2.23938	0.212382	0.721505	1.53343		853.76		427.76		1.3906		1.1562			4.5577		7.7129		5.2087
	0.192739	0	0.677956	0.400837	3.05449	0.410011	1.25332	0.235154		839		504.64	418.821	1.9538	0.3094	2.2188	2.5232		4.6576		6.2104		4.5678
	0.523747	0.101397	1.03094	0.639867	1.33914	0.204083	0.522953	1.10056		741.56		411.48		1.1562	0.6575	2.375			4.206		7.813		4.3573
	0.292858	0.525004	1.03394	0.615204	1.31824	0.093743	0.236992	1.20669		458.44	439.068	411.56		1.0156		2.9688			5.0584		6.7094		6.9616
	0.520751	0	1.29133	0.521221	1.68707	0.152448	0	0.113983		610.12		432.578	434.671	1.2812		4.25			4.5126		3.5059		8.4141
	0.708881	0.642323	1.07302	0.626872	0.745949	1.69629	0.261895	0.426017		545.52		449.281		0.5938	0.5506	2.6406	2.5094		4.5073		4.9082		8.1636
	0.373243	0.524606	0.552628	0.967453	0.650976	0.986914	0.369861	1.59293		510.2		439.094		0.7969		2.7969			5.96		6.8113		4.6071
	0.713154	0.467727	1.19314	0.562018	0.665115	0.547398	0.927578	0.579109		472.484	454.819	462.109		0.8281		1.5156	1.8189		4.9082		6.7911		5.0084
	0.376679	0.126558	1.11482	0.70059	0.303359	0.481317	0.29131	0.156435		532.031		518.141	423.646	1.0312	0.5282	1.5938			5.0083		5.4591		6.1102
	0.714872	0.149205	0.917383	0.795043	0.221295	0.447815	0.535655	0.337772		546.266		454.453		1.1406		1.9844			5.5092		7.4123		3.6561
	0.488279	0.195378	0.549821	0.532256	0.250801	0.596575	0.157772	0.899667		646.406		438.844		1.7188		2.125			4.4073		4.808		10.8331
	0.377957	0.128255	0.902512	0.393057	0.219451	0.474248	0.403287	0		523.328	415.941	410.609	412.374	1.4375	1.0669	2.9531	2.995		4.265		5.7593		6.2832
	0.471163	0.0726751	0.491542	0.232634	0.378353	0.437672	1.17376	0.279443		556.734		404.25		1.9844		2.7656					5.6595		7.0054
	2.45532	0.326587	1.34141	0.462396	0.811108	0.280922	0.330753	0		524.266		403.641		1.7656		3.7812					4.6578		6.7888
	2.82153	0.310498	0.839908	0.665174	0.422612	0.592886	0.281282	0.16078		545.844	402.892	435.031		1.6719		2.4062					6.8114		7.5831
	1.50881	0.509166	1.69697	0.537816	1.14367		1.61081	0		519.203		439.422	439.512	1.4375		0.7031	0.69				5.2588		11.1219
	2.9091	0.888107	1.06946	0.446214	0.674643		1.1405	0.309861		576.297		483.078		3.1875	2.9471	0.6719					5.9099		7.2943
	2.13772	0.240316	1.14451	0.689515	0.602722		0.829973	0.18468		472.766	430.333	501.609		3.2344		0.9062					5.2087		7.5109
	0.9528	0.995747	0.797293	0.413589	0.46472		1.30513	0.0695266		1053.66				3.2969							6.9616		6.6443
	0.959588		1.15892	0.335467	0.664807		1.19248	0.0668525		815.812				3.7969							4.6578		6.1387
	0.899608		0.890456	0.612342	0.407552		0.584959	0.316045		464.969				4.1406							6.1603		10.9053
	0.67203		0.879579	0.35586	0.429989		1.26685	0.125348		680.047				3.4531							5.96		5.2721
	0.897953		0.743954	0.449264	0.295367		0.872759	1.06947		450.125				2.8281							4.9082		9.7418
	1.25657		0.966652	0.427935	0.319648		0.13571	0.393594						1.8281	0.8304						4.4074		10.0386
	1.68378		1.77971	0.53317	0.194248		0.630753	0.920224						1.2031							5.6594		4.7666
	0.588649		1.34251	0.505811	0.439824		2.73945	1.15387						1.4688							5.7596		7.5831
	1.86207		1.40473	0.310666	0.485927		3.31739	0.204903						1.3906							6.3606		5.561
	1.10787		1.03158	0.340035	0.410625		2.89053	0.823957													4.0568		4.5499
	0.441539		1.07773	0.448803	0.660812		2.05137	1.17694													7.1619		9.0275
	0.535604		0.689311	0.201951	1.01089		0.188858	1.07198													7.813		5.3443
	0.798462		0.980345	0.446365	2.16009		0.029248	0.760781													5.8598		8.0164
	0.382021		0.850599	0.381339	1.45409		0.071365	1.07164													5.4091		4.911
	1.15061		1.07228	0.376144	1.12399		0.527633	0.620725													6.0602		4.3332
	0.315903		0.726988	0.598795	1.37326		0.481171	0.889305													5.1586
	0.281336		0.968644	0.606077	3.08614		0.199053	1.70808													4.5576
	0.179142		1.18587	0.538149	0.532645		0.584959	0.259471													6.7613
	0.831144		1.13934	0.754985	0.577519		0.903845	0.504402													6.4608
	1.86001		1.04044	0.455955	0.769		0.952146	0.966185													5.7597
	0.913163		1.37248	0.370285	0.422919		0.968859	1.02418													5.3086
	1.56877		1.34271	0.546503	0.573523		1.53126	0.433705													5.2588
	1.92533		1.00058	0.320389	1.0656		0.484012	0.275599													4.5576
			0.904324	0.394744	1.02533		0.562229	0.297995													4.7079
			0.976874	0.623174	0.687244		0.759444	0.657828													5.409
			1.28984	0.386451	1.66248		1.62151	0
			1.18964	0.330219			1.42346	0.630753
			1.78917				1.00061	0.862564
			1.58077				1.15621	0.130529
			1.19259				0.40195	0
			0.957346				0.77248	0.251198
			0.700251				0.672201	0.7556
			0.991754				0.0549861	1.15772
			1.0879				0.0563232	0.48702
			1.31393				0.218106	0.248023
			1.02658				0.118997	0.0553204
			1.20207				0	0
			0.769746				0.017883	0.911366
			0.841329				1.17109	0.502229
			1.06671				1.09521	0
			1.06475				1.09755	0.325404
							1.77142	0
							2.13025	0.029248
							1.73666	0.592647
							2.4122	1.09705
							1.93287	1.11443
							0.585628	0.968525
							0.987578	0.587633
							0.96184	0.621895
							0.227465	0.747578
							0.658998	0.747578
							0.670363	0.333761
							0.0902508	0.647633
							0.389917	0.673204
							0.284123	0.717327
							0	0.649639
							0.949973	0.625071
							1.20552	0.877439
							1.55348
							1.79582
							0.88379
							0.703956
							0.621561
							0.931589
							1.10892
							1.66797
							2.06156
							2.00323
							1.30145
							2.47471
							1.7024
							2.66691
							2.6395
							2.13293
							1.46307
							1.34541
							1.38736
							2.34803
							1.44535
							1.71042
							2.02613
							1.99772
							1.10022
							1.06346
							1.34006
							2.17906
							1.34206
							1.33354
							1.29944
							1.35794

## Sheet: Suppl. Figure 1 
Suppl. Figure 1A	Untreated		PRC1 siRNA		Suppl. Figure 1B	Untreated		PRC1 siRNA		Suppl. Figure 1C	opto cells	ctrl cells	untreated	PRC1 siRNA	Suppl. Figure 1E			Normalized corrected spindle int			Suppl. Figure 1F	Time (s)	Mean spindle int. (a.u)	Mean spindle int. (a.u)	Mean spindle int. (a.u)	Mean spindle int. (a.u)	Mean spindle int. (a.u)	Mean spindle int. (a.u)	Mean spindle int. (a.u)	Mean spindle int. (a.u)	Mean spindle int. (a.u)	Mean spindle int. (a.u)	Mean spindle int. (a.u)	Mean spindle int. (a.u)	Mean spindle int. (a.u)	Mean spindle int. (a.u)	Mean spindle int. (a.u)	Mean spindle int. (a.u)	Mean spindle int. (a.u)	Mean spindle int. (a.u)	Mean spindle int. (a.u)	Time (s)	Normalized corr. spindle int.	Normalized corr. spindle int.	Normalized corr. spindle int.	Normalized corr. spindle int.	Normalized corr. spindle int.	Normalized corr. spindle int.	Normalized corr. spindle int.
N (cells)	56	56	43	43	N (cells)	21	21	10	10		Metaphase	Metaphase	Metaphase	Metaphase		19	21	6	5	18	N=19	0	571.97	743.54	435.53	508.92	474.35	473.64	488.19	894.11	487.21	425.83	577.55	708.13	484.47	581.51	514.52	764.21	677.28	477.79	660.26	0	1	1	1	1	1	1	1
	Mean spindle int. (a.u.)	Mean cyt. Int. (a.u.)	Mean spindle int. (a.u.)	Mean cyt. Int. (a.u.)		Mean spindle int. (a.u.)	Mean cyt. Int. (a.u.)	Mean spindle int. (a.u.)	Mean cyt. Int. (a.u.)		N=37	N=21	N=8	N=24		+iLID exp no SiR-tub	+iLID exp with SiR-tub	-488 ctrl no SiR-tub	-iLID ctrl no SiR-tub	-iLID ctrl with SiR-tub		10	551.01	716.22	430.9	500.66	485.58	479.23	521.62	890.15	493.75	426.98	603.01	790.49	493.44	574.62	502.95	784.66	722.08	468.14	708.97	10	0.86119	0.8806	0.76215	0.78731	1.2255	1.384	1.4043
	7014.95	2625.5	3020.95	2669.73		2177.2	1952.4	2910.07	2841.43		Anaphase	Anaphase	Anaphase	Anaphase		0.50071	0.15824	0.95736	1.0788	2.5052		20	541.94	666.2	422.73	493.64	483.83	480.42	530.17	875.2	478.78	447.12	591.05	776	491.48	542.62	494.99	777.3	687.91	472.38	700.22	20	0.83319	0.75157	0.88214	0.77942	1.2745	1.1494	1.4184
	18893.9	3944.79	3540.04	2426.91		2138.07	1962.18	2708.31	2049.09		N=56	N=51	N=29	N=13		0.53159	0.36532	0.83441	1.4069	1.5441		30	531.82	666.88	421.75	498.35	476.11	493.86	537.68	879.92	466.11	439.4	580.28	772.88	498.47	548.21	481.35	729.75	691.7	462.17	689.86	30	0.74357	0.71878	0.85664	0.79605	1.2721	1.2167	1.5271
	20790.9	2971.44	2925.43	2570.9		2147.51	1969.28	2307.15	2000.28		Total	Total	Total	Total		1.1521	0.47428	0.92322	1.0699	1.4904		40	522.27	645.13	412.29	493.28	489.51	473.35	523.07	869.99	470.6	452.64	584.7	765.53	494.92	543.11	487.14	750.61	682.19	473.88	698.58	40	0.66698	0.67407	0.73436	0.7426	1.2169	1.3458	1.3245
	7169.26	3052.87	3949.51	2712.37		2512.39	2053.94	2563.51	2077.53		N=93	N=72	N=37	N=37		0.71223	0.32223	0.81195	1.3102	1.199		50	504.22	623.07	433.7	488.79	484.3	480.71	528.82	885.11	466.08	457.64	571.71	769.04	503.79	538.36	474.84	752.69	693.73	468.23	695.32	50	0.55403	0.61786	0.70828	0.68411	1.3794	1.324	1.4771
	19607.5	3366.52	3210.66	2465.23		2328.55	2003.67	2521.36	2056.99		Entry (min)	Entry (min)	Entry (min)	Entry (min)		1.5522	0.14209	0.84202	1.2084	1.1532		60	514.16	616.01	418.41	480.87	505.03	492.03	539.85	870.99	461.7	445.45	562.75	755.88	495.9	541.76	470.55	743.18	676.45	461.81	683.56	60	0.57042	0.58963	0.84868	0.66452	1.4899	1.2278	1.2724
	8376.35	3169.29	3396.01	2644.42		2434.12	2049.9	2488.42	1995.54		9.6	8.5017	6	4		1.2786	0.11409	1.3372		0.90768		70	503.29	623.74	428.06	468.85	492.32	481.4	529.11	846.15	465.19	462.02	566.64	770.21	505.88	520.55	477.27	769.05	671.13	458.87	675.37	70	0.59797	0.57621	0.85562	0.67171	1.4905	1.2725	1.2154
	15648.8	3358.72	4064.91	2885.64		2169.71	1992.94	2412.68	2079.7		11	12.6692	4	19		1.2109	0.096834			1.24		80	497.63	592.13	421.63	486.46	499.25	494.54	538	854.15	452.78	444.27	556.84	776.26	502.09	525.64	469.67	755.89	682.16	458.42	673.48	80	0.54998	0.52459	0.80506	0.66217	1.4958	1.2432	1.2852
	18152.1	3275.86	2814.67	2434.83		2345.28	2008.36	2550.13	2031.94		7.3	5.001	7	11		0.87391	0.098584			1.0618		90	500.59	590.67	433.23	472.88	504.57	482.85	529.82	859.53	466.42	451.18	565.87	779.54	500.8	538.98	468.35	751.42	675.92	458.2	662.13	90	0.50071	0.53159	1.1521	0.71223	1.5522	1.2786	1.2109
	23476.6	3805.62	2845.74	2368.77		2127.36	2028.32	5103.51	4802.98		5	5.6678	10	18		0.63162	0.21519			0.98649		100	494.63	587.54	417.89	475.38	495.83	477.2	522.85	846.72	465.12	445.72	572.09	791.82	504.18	527.41	472.21	757.42	680.44	460.26	640.45	100	0.48427	0.51238	1.0041	0.5845	1.4819	1.1757	1.1551
	10363.7	3749.41	3668.53	2294.89		2385.09	2036.32	2558.39	2008.45		13.6	19.1705	10	8		1.3504	0.50861			1.8974		110	505.27	598.41	424.76	477.58	505.88	480.19	520.5	838.56	470.36	451.37	566.67	803.07	514.12	527.84	464.19	758.53	689.55	451.59	638.09	110	0.47065	0.40454	0.92642	0.65545	1.5288	1.0993	1.1145
	21432	3649.06	2866.17	2797.34		2271.64	1999.11				9.3352	11.1689	8	15		0.86413	0.33424			1.2091		120	498.5	571.03	430.94	470.77	504.83	482.86	510.93	848.75	470.89	450.35	571.05	781.17	506	529.28	470.45	734.8	679.97	459.15	640.21	120	0.52677	0.40015	1.2137	0.64335	1.3838	0.95321	0.96387
	15127.1	3034.19	3394.73	2667.48		2219.02	1978.19				9.1685	6	8	9		1.2016	0.050337			0.87614		130	489.82	558.38	429.51	463.01	498.36	480.18	507.56	835.88	475.41	448.74	587.35	775.35	509.21	543.03	461.22	769.06	663.27	457.22	629.78	130	0.49777	0.39283	0.9821	0.65959	1.3279	0.93856	0.84191
	8617.98	2879.06	3470.01	2575.47		2260.6	2000.82				5.5011	11	5	8		1.3752	0.063192			0.91665		140	493.27	553.81	425.96	448.24	513.34	463.68	498.97	843.32	472.85	452.79	574.2	766.81	494.66	544.7	462.04	769.28	671.26	439.75	645.07	140	0.44965	0.37425	0.74673	0.51933	1.4535	0.96786	0.85509
	4573.93	2596.22	3353.02	2506.12		2299.14	2085.99				9.1685	11	10	12		0.66055	0.15489			1.2058		150	503.82	568.33	433.77	463.37	503	470.17	519.19	846.71	458.25	442.21	564.74	743.89	513.16	538.5	453.12	768.3	687.46	449.21	608.99	150	0.44148	0.35824	1.0041	0.52672	1.4482	0.93991	0.90161
	3626.69	2568.09	3150.5	2466.9		2189.75	2043.72				4.8343	11	4	4		0.60543	1.3541			1.1734		160	484.4	546.55	433.62	461.64	491.79	474.58	506.04	844.6	453	451.19	556.53	747.74	516.68	535.7	450.15	765.03	684.88	450.74	646.51	160	0.40617	0.30528	0.78902	0.50217	1.4974	0.82709	1.013
	4226.21	2428.23	2531.01	2466.55		2023.71	1951.23				4.3342	4	5	6		0.88717	0.65568			1.1935		170	495.79	523.6	433.26	454.22	492.15	472.44	504.84	856.86	463.93	445.99	563.92	757.45	508.9	530.23	444.37	757.03	666.07	449.73	644.46	170	0.38897	0.31518	1.0822	0.41792	1.4124	0.87124	0.9359
	3998.07	2470.48	2503.23	2571.82		2127.55	1970.15				5.6678	5	6	13		0.94599	0.42476			1.1637		180	498.29	536.42	444.59	440.79	508.54	469.34	516.29	839.74	456.55	461.49	567.53	741.69	508.94	518.64	447.66	755.69	668.17	457.85	630.29	180	0.4455	0.28386	0.89482	0.45106	1.4635	0.67908	0.94909
	3709	2246.43	2474.39	2241.86		2162.28	2024.74				9	6	4	17		0.65108	1.0368			0.96738		190	477.97	543.18	437.27	459.94	498.66	457.13	510.18	856.66	459.07	448.58	566.58	744.68	504.46	522.22	454.81	750.09	667.1	459.04	624.89	190	0.38343	0.27479	0.92779	0.5005	1.4916	0.51962	0.87815
	3899.39	2513.17	2636.27	2327.18		2093.8	1960.69				9	20	10			0.98152	0.60138					200	472.12	541.08	414.86	431.76	508.15	445.79	498.59	851.71	450.5	445.15	549.36	740.38	505.19	533.17	443.68	762.07	683.34	462.73	621.37	200	0.3766	0.29452	0.63788	0.37014	1.5262	0.72108	0.78476
	3441.34	2360.39	2404.79	2265.06		2104.02	1964.09				6	12	7				0.82909					210	498.75	532.03	414.24	440	499.08	459.59	505.78	851.05	446.89	435.97	554.26	753.37	495.3	528.89	450.56	766.34	656.17	447.75	620.52	210	0.38031	0.22459	0.74739	0.35246	1.5096	0.58788	0.86567
	3865.11	2548.82	2402.93	2163		2054.84	1958.66				16	12	4				0.61344					220	486.54	543.06	421.59	448.16	498.02	449.34	512.81	854.65	462.67	442.71	548.26	727.35	485.14	518.08	453.25	742.35	658.22	443.63	630.42	220	0.33307	0.24831	0.2287	0.37865	1.3397	0.55677	0.89554
	3629.89	2369.28	2295.7	2183.52							10	12	4									230	490.38	523.25	409.23	442.24	490.43	456.32	506.33	844.3	443.43	443.25	537.7	736.43	484.91	537.21	437.94	746.54	652.44	441.68	615.53	230	0.37707	0.29065	0.41453	0.41629	1.403	0.57377	0.84294
	4343.4	2577.52	2403.27	2240							7	5	7									240	474.1	527.77	415.55	435.27	503.83	455.79	502.54	847.75	460.24	432.96	531.9	750.72	478.25	537.18	444.98	735.77	652.8	457.53	611.3	240	0.35978	0.26231	0.33847	0.39842	1.4287	0.32346	0.85774
	4199.75	2419.78	2334.81	2172.11							12	11	10									250	490.1	534.24	422.72	442.05	510.27	440.1	509.25	833.34	446.62	442.85	533.08	747.82	485.17	523.17	441.17	735.46	640.08	442.44	604.59	250	0.30848	0.28243	0.58613	0.306	1.3304	0.46662	0.85049
	3989.84	2170.86	2285.84	2140.74							7	17	18									260	476.8	533.5	419.68	453.73	497.77	445.49	512.95	832.07	455.88	445.11	541.73	731.05	468.08	503.8	448.83	745.15	657.79	442.49	594.1	260	0.29564	0.26062	0.17713	0.35191	1.3363	0.2991	0.80709
	4082.72	2515.53	3391.48	2252.12							20	8	5									270	475.51	510.56	423.36	437.85	504.38	447.8	509.9	840.66	445.86	441.88	539.3	737.26	482.36	522.03	444.86	734.68	638.61	426.29	596	270	0.29895	0.20642	0.58039	0.32418	1.3187	0.43038	0.94042
	3312.16	2187.21	2264.89	2179.62							4	7	7									280	486.16	509.8	424.75	437.61	495.56	447.09	503.41	831.32	449.42	436.13	529.95	727.76	479.82	510.02	440.73	718.03	651.7	441.68	587.06	280	0.29756	0.21255	0.54397	0.30807	1.2908	0.38911	0.87901
	3971.88	2549.94	2203.86	2152.39							13	7	10									290	476.79	518.12	423.39	441	481.79	448.99	485.47	832.32	448.28	433.7	540.33	734.15	475.85	501.46	435.76	712.93	647.31	446.62	584.29	290	0.30487	0.22863	0.49585	0.24447	1.3144	0.34056	0.92586
	3838.01	2277.55	2371	2204.23							11	5	9									300	467.58	515.52	416.24	452.06	489.06	446.92	507.61	813.31	443.62	419.63	559.27	733.86	469.23	496.88	426.48	713.74	637.96	439.84	574.76	300	0.25784	0.20743	0.30308	0.30216	1.2833	0.24804	0.8678
	3284.08	2617.63	2239.86	2076.94							6	5	4									310	477.22	505.03	411.76	419.26	500.54	448.33	497.74	797.89	453.88	440.79	536.04	720.79	466.62	490.75	451.79	716.55	623.46	439.38	562	310	0.2224	0.21723	0.34409	0.28544	1.3399	0.094344	0.77805
	4593.59	2322.47	2356.54	2201.96							14	14	6									320	464.04	523.4	412.66	433.39	493.26	432.82	497.66	816.25	433.44	439.4	532.57	706.85	472.32	502.14	431.48	717.69	633.11	433.61	572.4	320	0.28944	0.18246	0.088165	0.21058	1.2712	0.13394	0.82471
	3525.61	2340.09	2350.94	2054.5							5	7	7									330	460.05	509.26	417.57	421.42	495.54	428.54	520.67	786.12	444.15	437.84	540	710.88	467.66	503.28	438.31	720.88	632.07	434.84	563.86	330	0.26309	0.17432	0.27563	0.19861	1.2651	0.19745	0.9026
	3752.01	2193.25	2296.17	2199.56							5	11	4									340	456.11	509.68	411.9	424.46	495.99	434.95	491.44	791.64	449.42	437.71	531.21	698.7	468.26	497.18	441.76	714.23	629.03	445.9	565.1	340	0.24499	0.18503	0.24319	0.20123	1.3423	0.21827	0.73292
	3278.89	2185.44	2337.89	2157.12							8	13	17									350	456.62	521.69	409.41	414.73	485.53	436.7	494.88	787.1	449.63	423.88	544.47	691.11	468.26	491.05	438.31	716.74	606.78	442.57	570.23	350	0.24576	0.16181	0.29693	0.18875	1.2694	0.29991	0.75159
	3274.55	2402.76	2262.58	2226.03							6	12										360	471.3	488.6	416.29	432.34	489.41	441.76	493.42	798.37	441.49	442.41	521.27	681.22	458.35	492.28	420.3	718.98	614.37	429.06	563.89	360	0.22417	0.14472	0.11981	0.091286	1.0943	0.21513	0.76668
	3605.7	2316.32	2633.99	2358.24							8	11										370	448.4	498.89	407.36	413.58	482.87	437.66	499.04	790.15	452.63	431.91	539.25	666.33	465.76	497.46	441.48	706.19	622.68	424.61	565.03	370	0.2197	0.1426	-0.11884	0.15802	1.1722	0.097794	0.81276
	2855.9	2088.27	2432.2	2350.27							5	5										380	454.83	500.59	413.79	424.21	484.14	434.51	495.12	790.65	451.99	437.21	547.89	701.35	470.92	479.75	440.87	701.89	628.4	425.42	555.5	380	0.19991	0.12679	0.29698	0.096085	1.0677	0.14006	0.69918
	2983.34	2314.72	2325.05	2132.91							4	5										390	462.96	495.22	423.4	421.09	460.02	431.52	505.52	787.47	438.08	444.06	529.98	687.43	462.51	480.6	446.06	701.31	622.46	429.39	557.98	390	0.26383	0.092702	0.39531	0.064388	1.0508	0.19086	0.69417
	4824.92	2264.16	2376.57	2149.66							12	7										400	452.06	494.24	409.99	427.02	471.06	439.21	494.25	789.03	443.42	425.59	541.35	676.53	447.77	491.45	438.66	701.43	616.71	414.2	559.1	400	0.24036	0.10715	0.15918	0.073646	1.0501	0.051975	0.78424
	3807.09	2180.01	2446.89	2401.25							7	5										410	459.35	489.33	419.81	428.52	489.03	430.4	487.82	786.03	455.34	442.36	528.47	661.59	442.53	480.46	439.37	699.2	631.42	430.31	547.62	410	0.1543	0.096994	0.11521	0.15985	1.0819	0.16386	0.8387
	3107.32	2253.74	2440.45	2265.5							10	15										420	445.75	489.33	403.03	428.1	466.91	440.31	482.07	782.47	450.33	438.51	524.95	665.77	449.33	473.25	430.2	687.23	625.96	429.43	567.74	420	0.20479	0.12399	0.25027	0.096961	1.0727	0.16605	0.7307
	3841.19	2300.2	2340.96	2233.8							4	4										430	456.55	473.68	416.57	415.63	479.81	433.97	504	763.54	449.41	443.75	520.55	667.04	461.54	475.6	428.18	679.54	607.83	429.89	571.9	430	0.15527	0.082141	-0.024174	0.04195	0.96873	0.18404	0.85688
	3718.55	2213.54	2346.92	2213.31							5	11										440	450.42	493.06	411.21	420.35	478.69	447.65	481.57	792.06	435.74	429.76	536.79	687.24	464.62	473.53	432.28	663.83	606.77	420.14	565.13	440	0.13946	0.097258	-0.16051	0.075797	0.99646	0.0093993	0.67247
	6334.05	2418.82									8	8										450	442.38	483.6	408.35	399.79	478.19	427.02	503.76	783.68	439.69	426.95	544.47	685.35	448.75	471.12	432.74	671.47	596.5	412.25	585.71	450	0.1579	0.072823	-0.16139	0.083761	1.0096	0.18226	0.73999
	3726.78	2124.29									10	15										460	442.46	473.66	398.33	423.1	462.56	434.21	485.1	772.58	448.94	427.69	535.51	685.42	452.85	457.59	436.16	667.56	598.02	434.15	565.87	460	0.16904	0.08494	-0.034647	0.042657	0.84834	0.097277	0.85031
	3508.95	2183.94									15	6										470	448.14	475.31	416.36	420.06	454.34	423.53	512.89	775.96	443.44	442.29	521.78	691.61	440.98	473.41	439.53	650.1	589.53	412.16	582.36	470	0.13494	0.057579	-0.10293	0.062009	0.89025	0.08135	0.83425
	4572.11	2264.54									6	4										480	455.11	485.28	396.7	417.64	457.42	442.33	492.72	777.23	445.66	427.17	524.47	680.22	442.32	471.46	415.33	661.2	567.73	421.11	571.26	480	0.19169	0.096529	-0.12626	0.12182	0.83839	0.16214	0.79003
	5732.07	2571.41									15	10										490	443.17	491.23	411.02	421.71	467.25	439.16	497.39	777.42	449.49	431.56	539.6	672.39	459.3	469.41	444.06	662.43	566.77	418.24	567.55	490	0.14382	0.066035	-0.17964	0.092451	0.89426	0.18528	0.69587
	4902.2	2410.79									9	5										500	439.81	496.89	390.75	415.37	464.52	436.85	501.6	762.67	441.94	434.22	533.52	681.28	447.74	458.36	426.01	652.03	528.32	421.12	561.12	500	0.12418	0.061807	-0.043928	-0.043602	0.82942	0.083271	0.8048
	3506.91	2227.87									6	8										510	448.87	479.98	414.47	406.56	466.99	431.28	505.21	761.96	448.2	436.44	518.34	665.7	450.4	474.03	433.42	649.48	538.96	433.72	567.57	510	0.17612	0.10724	0.19803	-0.063771	0.85983	0.11895	0.85373
	3133.55	2177.63									4	10										520	435.09	489.68	405.75	421.24	469.42	425.59	485.4	762.35	438.29	416.91	501.08	661.68	448.43	474.33	428.29	626.47	544.2	425.78	564.47	520	0.1339	0.089425	0.23546	0.047933	0.89674	0.10639	0.80092
	3568.48	2102.55									9	14										530	437.03	484.11	404.74	405.28	466.96	435.89	505.14	760.02	435.9	425.19	518.09	661.91	444.81	468.95	429.42	634.21	548.23	408.6	550.11	530	0.17358	0.10377	-0.21367	-0.063811	0.77715	0.1138	0.68732
	3942.6	2392.61									15	4										540	452.83	477.25	391.95	419.4	451.28	422.86	505.99	779.61	439.94	427.93	510.73	670.23	443.85	466.95	419.45	640.83	530.27	413.4	554.53	540	0.14276	0.0783	-0.25221	0.033976	0.60316	0.12105	0.76896
	4281.45	2511.6									10	10										550	438.73	476.97	397.16	423.74	447.87	432.13	488.8	767.11	447.98	412.65	518.32	670.5	441.99	458.08	423.65	627.98	519.21	430.65	558.03	550	0.12999	0.074041	-0.15388	-0.023016	0.70914	0.092278	0.84331
	4463.76	2285.11									5	6										560	443.09	475.71	406.76	417.46	453.08	425.19	500.44	774.54	446.08	425.03	518.52	657.02	430.17	471.06	430.19	626.96	524.99	427.42	551.95	560	0.1225	0.07384	-0.0879	0.066111	0.77626	-0.040221	0.78616
	3929.1	2340.08									13	9										570	459.1	469.63	403.08	414.03	452.39	422.35	511.76	779.23	445.35	431.01	509.82	658.07	433.3	470.75	425.54	638.37	526.39	406.81	547.33	570	0.1338	0.025209	-0.132	-0.085582	0.8378	0.032557	0.81122
											13											580	434.14	480.97	414.69	413.17	460.9	418	489.36	775.05	439.67	428.21	514	657.69	444.33	449.94	425.85	612.19	524.04	410.86	544.55	580	0.13146	0.039823	0.016219	-0.029267	0.87112	0.092319	0.65754
											10											590	435.22	465.73	412.31	393.57	451.22	430.02	507.32	771.67	430.97	422.07	502.38	645.03	437.81	460.77	432.99	610.48	528.32	425.94	532.64	590	0.084178	0.018873	-0.12096	0.024011	0.54979	0.027971	0.75411
											5											600	445.41	473.8	411.95	412.92	457.55	438.64	493.87	762.4	431.1	427.04	504.01	653.46	444.18	441.73	437.5	616.63	531.75	426.06	537.22	600	0.13441	0.040636	-0.15578	0.0077449	0.79033	0.1312	0.84422
											16											610	443.12	469.91	395.36	406.77	462.93	430.28	496.62	761.96	440.04	416.22	527.96	638.33	442.64	444.11	414.76	607.37	518.63	422.64	538.04	610	0.11973	0.015018	-0.32438	-0.029596	0.83869	-0.1136	0.81678
											9											620	436.11	457.32	405.94	416.87	461.59	433.9	508.17	762.62	421.66	425.15	516.83	630.62	431.37	464.23	417.03	614.47	513.46	426.57	551.7	620	0.051355	0.024238	-0.2264	-0.0071874	0.77227	0.11035	0.78478
																						630	424.78	469.98	403.33	414.81	456.53	435.65	505.74	748.69	447.67	427.85	508.06	633.94	429.79	443.16	422.73	605.09	523.37	431.61	530.35	630	0.098476	0.0082975	-0.24028	-0.065065	0.86647	0.08544	0.84186
																						640	424.78	466.87	406.47	400.72	473.35	435.84	504.46	751.09	425	418	524.07	626.76	431.24	446.22	416.48	598.87	521.39	404.81	539.28	640	0.020596	0.018324	-0.18132	-0.030462	1.1162	-0.024541	0.76607
																						650	441.29	466.33	407.08	415.41	454.79	426.92	501.46	753.21	437.2	413.75	506.47	641.78	436.07	439.72	424.55	575.08	530.23	432.94	530.83	650	0.075599	0.028811	-0.037034	-0.043602	0.57092	0.033651	0.81814
																						660	448.08	475.17	407.79	413.78	450.03	432.02	504.37	743.95	433.4	430.7	515.28	626.09	433.6	442.8	429.49	568.37	511.99	429.05	533.94	660	0.10343	0.029307	-0.078531	-0.059779	0.71903	0.18222	0.87258
																						670	433.55	468.14	401.76	405.53	462.13	436	496.92	729.69	439.91	426.14	513.43	617.86	431.91	451.1	432.27	578.77	516.28	419.82	517.96	670	0.058658	0.039967	0.087325	-0.083173	1.0253	0.142	0.83245
																						680	436.61	470.55	410.33	417.4	466.04	425.92	484.77	726.14	422.75	424.72	507.54	620.77	426.45	427.23	440.14	560.41	526.21	429.48	543.31	680	0.052867	0.015687	-0.10306	-0.11886	0.91219	0.027289	0.86581
																						690	432.13	454.06	415.99	403.28	459.16	425.26	476.33	726.72	424.56	420.8	517.01	624.3	423.53	450.94	425.85	554.97	509.82	418.7	540.86	690	0.093834	0.0020559	-0.12312	-0.077509	0.75031	0.02576	0.64992
																						700	430.06	458.59	398.8	410.85	454.62	435.15	488.91	736.02	438.14	416.28	507.94	628.74	423.79	432.04	424.1	565.55	503.73	433.17	526	700	0.089923	0.035024	0.024836	-0.015002	0.68885	-0.044621	0.60456
																						710	430.21	461.48	405.81	392.17	466.48	431.84	496.77	726.54	427.46	421.02	514.92	620.91	412.04	441.68	408.31	568.35	526.78	427.5	520.47	710	0.078649	0.019968	-0.1012	-0.0029865	0.99932	0.057015	0.71949
																						720	445.57	469.18	405.91	412.87	453.6	429.05	502.29	744.51	444.7	420.98	518.43	615.1	428.34	438.64	418.88	553.17	526.47	422.14	542.24	720	0.083908	0.028723	-0.019003	-0.042746	0.51645	-0.011135	0.71039
																						730	442.36	459.81	405.11	398.33	461.29	423.51	491.4	736.42	450.12	414.26	501.63	614.97	416.3	426.68	422.96	566.94	521.49	416.87	525.15	730	0.069866	0.029487	-0.12356	-0.054214	0.82612	0.067571	0.70954
																						740	427.26	454.11	409.28	414.88	452.56	424.68	488.26	726.56	446.45	423.48	497.92	656.35	441.51	454.9	415.05	551.69	513.78	426.66	523.62	740	0.047338	0.0021897	-0.30184	0.046101	0.67797	-0.022042	0.6536
																						750	427.15	460.8	407.09	419.59	447.04	426.47	491.26	737.12	435.37	408.26	519.14	632.72	431.8	428.68	428.23	534.93	516.08	426.49	531.4	750	0.0086774	0.027125	0.068985	-0.010811	0.55364	-0.066477	0.52713
																						760	433.55	461	399.64	398.97	457.42	430.02	491.62	726.65	445.58	429.1	511.42	628.85	435.91	442.21	411.91	550.16	502.19	434.78	532.14	760	0.1208	0.024622	-0.2515	-0.039441	0.84184	0.11199	0.71872
																						770	424.73	447.09	403.64	419.82	459.43	435.07	502.37	720.11	439.54	425.41	491.14	637.67	422.42	440.14	413.73	547.63	497.06	425.67	536.35	770	-0.056758	0.031092	-0.34471	-0.023145	0.76624	0.067675	0.86368
																						780	441.67	454.15	401.9	404.29	450.21	425.71	496.65	735.87	440.18	416.65	503.23	621.59	424.15	440.8	419.64	536.93	511.03	417.43	544.21	780	0.13996	0.018031	-0.20987	0.020935	0.5263	0.11201	0.76158
																						790	431.72	459.57	390.9	391.07	449.71	417	482.71	746.87	447.2	422.32	485.21	638.27	431.13	431.77	436.76	528.48	508.29	420.35	543.35	790	0.064502	0.012371	-0.58927	-0.028063	0.67866	0.019584	0.69809
																						800	428.01	452.97	402.06	417.01	460.52	417.91	492.97	735.71	434.08	432.2	503.5	651.58	410.62	436.42	423.68	561.2	506.92	421.98	544.76	800	0.0077374	-0.024808	-0.042823	-0.02212	0.84831	0.21722	0.71336
																						810	431.34	457.34	407.09	411.28	449.71	432.9	480.63	714.43	447.56	420.21	490.71	634.01	417.06	442.63	431.63	548.42	503.59	429.7	537.21	810	0.10095	-0.0019714	-0.32429	-0.061491	0.59286	0.084717	0.69572
																						820	429.91	456.99	400.16	413.61	467.96	425.93	490.51	719.06	419.11	418.68	497.03	630.61	431.38	434.21	424.8	554.9	499.42	409.88	535.11	820	0.018479	-0.012807	-0.3444	-0.075379	1.1128	0.12174	0.618
																						830	439.96	465.36	393.06	403.59	464.74	417.07	483.61	714.73	426.4	425.42	487.6	630.35	410.57	437.22	426.11	543.61	488.19	419.49	544.59	830	0.17183	0.02302	-0.2542	-0.052353	0.73869	-0.0471	0.64326
																						840	422.34	448.57	397.4	402.08	452.51	415.58	482.63	725.24	428.03	417.29	485.2	623.48	427.57	423.21	414.64	533.85	489.25	422.57	537.75	840	-0.016803	-0.017324	-0.344	-0.12766	0.62689	0.024872	0.72846
																						850	435.44	452.54	405.33	415.92	446.35	431.49	480.36	717.44	440.36	413.89	490.11	630.37	436.67	435.87	427.24	538.44	503.56	406.91	520.85	850	-0.018643	-0.0016792	-0.25504	-0.09724	0.66384	0.08292	0.52497
																						860	443.66	452.93	408.73	402.79	445.46	425.93	494.19	703.01	420.3	433.16	482.63	603.78	417.46	431.58	416.45	548.47	502.7	422.8	535.01	860	0.1456	0.0013941	-0.19776	-0.056185	0.75358	-0.036647	0.58264
																						870	430.15	447.86	407.87	404.33	445.49	421.41	487.3	705.41	419.23	436.83	487.98	615.45	417.76	436.17	422.7	547.03	483.23	432.55	533.69	870	-0.0032409	-0.0031895	-0.2656	-0.080844	0.77163	0.01791	0.54606
																						880	434.32	434.38	410	405.91	460.1	432.46	489.06	727.03	444.11	418.83	469.13	611.46	407.31	444.02	418.77	539.4	504.42	424.75	528.75	880	0.05731	-0.019246	-0.040658	-0.049048	0.99629	-0.10102	0.64083
																						890	438.33	450.67	401.1	416.6	444.84	422.01	476.35	706.6	426.04	413.93	471.84	602.6	410.27	440.17	421.55	550.83	505.2	418.24	536.81	890	0.05992	-0.028804	-0.12166	-0.1156	0.45803	-0.04303	0.65479
																						900	436.75	465.44	413.71	396.24	454.97	428.58	483.17	717.32	428.98	434.94	491.84	616.27	418.9	432.43	422.23	543.82	500.08	419.89	535.95	900	0.041211	-0.030997	-0.27523	-0.12057	0.82861	-0.091039	0.58251
																						910	440.6	453.23	406.27	404.32	435.56	427.7	491.01	689.42	433.24	421.3	470.38	591.23	405.62	431.2	427.88	529.09	504.35	416.84	528.15	910	0.16762	-0.024023	-0.65905	-0.03081	0.30964	0.1647	0.69825
																						920	422.71	444.57	400.8	407.67	457.88	410.92	481.53	730.74	428.2	410.81	497.68	610.12	410.31	439.18	424.95	531.95	486.44	413.56	527.65	920	-0.0030963	-0.028413	-0.3025	-0.016824	0.98343	-0.038671	0.67654
																						930	423.22	442.7	400.11	394.97	450.01	419.21	484.53	733.32	433.24	426.03	482.54	616.6	418.23	439.18	428.88	540.75	509.87	409.45	526.18	930	-0.060394	-0.038485	-0.24669	-0.077429	0.56884	0.036544	0.66779
																						940	443.6	448.4	412.93	391.73	464.01	412.74	467.57	724.21	420.39	420.97	491.29	630.45	409.63	430.64	419.9	527.19	494.77	415.39	516.94	940	0.12895	-0.02164	-0.17319	-0.068749	0.91323	0.047471	0.56153
																						950	431.01	445.38	407.69	405.37	460.84	435.97	477.01	709.06	430.16	420.38	478.21	617.98	414.92	438.12	420.67	539.54	482.53	419.43	531.69	950	0.043788	-0.033577	-0.27802	-0.065742	0.64565	-0.097443	0.73114
																						960	429.52	448.29	401.75	418.79	463.03	427.68	488.76	722.24	430.85	414.71	482.39	613.21	427.7	426.47	402.68	530.52	499.42	420.73	529.7	960	0.043939	-0.05427	-0.31514	-0.076792	0.76726	-0.076805	0.67176
																						970	426.6	451.92	400.31	410.11	464.01	427.8	503.61	714.03	434.25	409.74	494.82	611.07	426.91	441.13	425.83	531.51	492.19	427.32	524.85	970	0.014429	-0.066736	8.84e-05	-0.068709	0.80747	-0.075339	0.66341
																						980	426.21	449.2	392.65	406.51	459.81	438.31	488.09	715.51	424.75	433.57	485.03	600.22	407.62	434.95	419.35	543.67	500.26	421.17	523.37	980	-0.082994	0.004059	-0.041895	-0.084109	0.67198	0.12143	0.62709
																						990	440.31	445.98	397.98	390.21	454.83	440.63	489.18	708.28	429.9	422.25	487.6	604.39	412.09	417.02	412.83	539.68	504.88	415.36	531.57	990	0.10957	-0.015807	-0.028239	-0.11276	0.60175	-0.026876	0.6527
																						1000	429.33	447.84	409.57	420.46	456.81	420.1	481.42	722.39	427.92	416.34	476.44	593.36	417.61	420.82	421.47	532.78	497.03	401.17	506.41	1000	0.039706	-0.065275	-0.0742	-0.061014	0.79818	0.018385	0.56266
																						1010	421.87	431.12	402.42	408.92	455.73	423.88	479.77	714.95	434.49	422.39	483.21	600.41	425.9	433.43	409.93	545	493.79	414.55	520.13	1010	0.094525	-0.012497	-0.43367	-0.13844	0.72231	0.019831	0.65859
																						1020	421.87	431.95	396.89	400.94	463.66	422.16	489.26	707.14	437.36	407.74	495.41	583.96	409.62	442.65	421.46	530.29	500.56	407.78	511.73	1020	0.00065081	-0.0030381	-0.10014	-0.083631	0.83267	0.09044	0.58998
																						1030	421.87	450.39	397.48	401.74	465.89	409.97	480.45	730.57	433.98	423.83	492.33	586.66	417.51	434.32	417.9	546.23	482.92	413.49	527.63	1030	-0.092967	0.00095402	-0.042823	-0.047236	0.70822	0.01477	0.60384
																						1040	408.48	430.87	403.56	424.09	455.74	428.8	479.81	739.51	415.36	422.44	492.87	584.5	407.23	430.59	422.41	526.84	477.03	411.59	534.53	1040	-0.13543	-0.015585	-0.22561	-0.12934	0.48899	0.054722	0.59884
																						1050	424.4	436.13	412.41	407.57	442.68	432.01	473.52	732.61	422.85	422.24	478.5	571.73	420.38	424.7	430.95	529.37	480.76	420.17	540.31	1050	0.010722	-0.010586	-0.23864	-0.025136	0.45004	-0.042142	0.62526
																						1060	436.36	431.17	403.11	410.37	446.38	431.88	473.57	728.85	432.94	428.34	474.19	564.23	424.38	436.49	420.55	542.46	485.41	415.46	525.09	1060	0.025723	-0.023868	-0.42107	-0.067206	0.71431	-0.065093	0.7446
																						1070	430.88	434.45	401.38	418.74	446.66	430.39	492.28	723.52	425.15	419.73	491.23	581.86	399.45	427.49	422.93	538.67	496.88	412.32	540.47	1070	0.0073955	-0.0090263	-0.42637	-0.05742	0.56967	-0.021216	0.67712
																						1080	432.57	440.96	393.21	416.44	453.01	436.75	475.33	714.51	435.19	392.63	497.22	578.87	406.61	430.48	416.33	533.62	482.38	430.16	543.16	1080	-0.00046674	-0.040791	-0.50791	-0.042955	0.62787	0.069555	0.63424
																						1090	412.6	442.27	401.47	414.69	446.84	411.49	483.87	698.76	437.21	418.55	482.14	582.63	412.38	429.11	400.19	549.02	478.19	400.79	543.27	1090	-0.0073495	0.005087	-0.23276	-0.097319	0.61046	-0.055342	0.61067
																						1100	419.06	430.72	410.26	401.57	452.57	408.97	477.42	686.86	437.08	407.83	488.27	583.46	422.22	432.38	420.53	535.72	490.13	424.74	522.25	1100	-0.033007	-0.01349	-0.32256	-0.10495	0.55175	0.10502	0.63192
																						1110	420.63	446.86	401.4	398.82	445.71	428.71	473.41	685.15	415.32	417.56	478.77	579.11	404.69	427.19	421.58	536.98	481.53	428.54	541.04	1110	0.034841	-0.034514	0.045607	-0.060974	0.53485	-0.017848	0.63517
																						1120	427.44	448.13	395.49	419.21	435.03	431.41	482.03	665.44	432.63	424.68	485	568.93	413.21	433.01	412.69	527	483.07	424.42	525.67	1120	0.00165	0.002679	-0.17854	-0.10045	0.52677	0.010928	0.67015
																						1130	431.73	433.61	406	410.52	446.04	423.73	477.3	668.01	421.66	434.91	486.48	563.54	407.5	432.71	422.21	533.08	488.56	406.63	523.49	1130	0.037149	-0.019918	0.021743	-0.081899	0.49749	0.055652	0.66024
																						1140	425.5	437.25	386.16	402.28	432.63	426.11	471.6	665.05	421.52	417.32	482.24	566.81	407.84	432.75	412.84	531.61	494.99	413.41	529.41	1140	-0.05923	-0.030113	-0.21769	-0.11844	0.53584	0.13035	0.6268
																						1150	410.75	452.28	398.05	398.01	428.99	440.53	482.98	671.25	426.59	412.2	466.81	577.15	416.82	425.32	412.21	517.83	481.23	420.64	524.5	1150	0.05217	-0.00043301	-0.34152	-0.11339	0.49651	0.085358	0.71599
																						1160	429.15	437.57	401.96	410.57	447.25	413.65	495.3	655.7	428.07	420.64	491.95	558.65	404.8	441.96	424.84	532.87	487.93	424.54	530.87	1160	0.027584	-0.01406	-0.047817	-0.072462	0.46152	0.0033879	0.59835
																						1170	413.31	448.19	402	400.04	430.05	418.68	484.4	665.35	419.51	414.25	487.37	564.7	399.7	420.22	423.21	524.23	466.66	406.35	530.59	1170	0.031587	0.011146	-0.32685	-0.031487	0.42164	-0.033466	0.58064
																						1180	413.5	434.89	401.02	408.64	450.71	432.54	477.88	656.48	433.34	427.08	475.9	571.21	411.29	430.34	420.89	534.18	489.23	416.95	525.92	1180	0.053129	-0.036535	-0.10164	-0.1163	0.35198	0.087134	0.67548
																						1190	432.03	450.2	409.19	415.4	445.73	428.61	487.4	661.14	427.62	408.99	482.27	574.68	405.82	428.32	423.82	541.53	487.56	421.99	526.54	1190	0.029635	0.0085721	-0.38059	-0.14111	0.46999	0.10285	0.66631
																						1200						436.36	472.29	676.53	428.21	418.97	478.94	537.72	404.66	423.71	423.68	545.81	471.01	419.43	538.4	1200						0.070918	0.56817
																						1210						434.37	468.36	680.96	422.49	420.96	496.01	535.48	395.27	423.04	420.41	545.42	481.8	415.29	561.32	1210						0.083994	0.60588
																						1220						434.25	484.51	697.52	451.69	421.75	525.96	554.26	413.34	437.36	422.07	598.25	508.08	423.91	586.55	1220						0.24242	0.69828
																						1230						447.67	478.2	700.79	442.14	415.18	531.68	594.96	409.96	446.21	441.08	640.59	523.02	428.44	600.01	1230						0.14353	0.74315
																						1240						461.72	504.72	716.99	457.88	428.3	556.11	615.2	420.52	461.95	432.42	688.89	544.37	431.79	613.85	1240						0.32379	0.71986
																						1250						481.89	492.11	715.62	449.04	425.44	553.94	609.68	424.26	470.98	441.68	709.49	550.99	431.21	628.69	1250						0.56964	0.89406
																						1260						464.34	495.59	718.67	465.12	421.63	568.98	624.54	421.28	476.5	446	718.01	571.19	433.02	637.72	1260						0.6609	0.92115
																						1270						462.68	523.88	722.93	474.63	436.98	564.42	630.91	423.1	487.55	438.67	736.5	578.15	427.17	645.89	1270						0.78592	0.92085
																						1280						466.14	504.27	711.67	466.17	431.5	570.93	635.45	420.2	492.57	459.84	746.96	583.66	436.47	660.96	1280						0.83618	0.98015
																						1290						459.61	514.23	722.07	474.36	439.11	561.18	631.35	433.28	496.9	453.02	772.13	595.81	428.13	674.25	1290						0.78446	1.0635
																						1300						481.02	509.36	717.65	468.71	433.56	570.86	631.95	419.05	500.91	457.77	779.19	593.86	430.41	679.81	1300						0.74461	0.99171
																						1310						475.62	505.91	722.46	456.84	426.02	565.16	640.11	431.71	491.98	445.5	766.94	604.69	417.7	675.4	1310						0.92958	1.0138
																						1320						462.3	495.63	699.72	466.7	431.95	564.58	623.26	424.73	507.1	464.75	779.92	586.68	441.72	668.14	1320						0.95594	1.0221
																						1330						471.34	500.69	694.05	445.01	418.57	563.02	629.56	430.77	507.89	472.34	806.98	589.89	438.54	674.07	1330						0.96854	1.0016
																						1340						463.13	512.05	704.01	460.98	428.09	560.34	615	436.97	500.84	469.27	797.4	592.31	436.26	685.82	1340						0.93016	1.0003
																						1350						456.18	494.1	687.9	458.69	431.98	559.6	611.29	434.46	518.36	467.12	797.29	589.59		671.76	1350						0.99717	0.87015
																						1360						463.9	499.49	700.85	463.34	419.89	559.97	606.24	412.49	490.22	459.02	789.39	596.66		665.94	1360						1.0186	0.89715
																						1370						458.34	497.89	689.45	454.95	429.05	560.79	617.27	429.28	490.9	470.79	779.45	596.99		672.23	1370						1.1106	0.93425
																						1380						455.64	474.58	688.42	465.9	431.06	561.45	597.25	437.01	503.42	472.81	789.95	587.26		654.87	1380						1.104	0.80879
																						1390						462.64	496.09	685.23	456.18	437.06	562.9	612.58	426.1	498.81	458.83	790.11	578.43		654.51	1390						0.96877	0.87575
																						1400						474.81	507.2	689.44	451.54	415.88	559.52	598.83	424.86	500.97	468.01	770.25	569.48		663.68	1400						1.0772	0.88345
																						1410						466.23	500.35	683.14	461.05	427.61	552.21	598.49	425.07	506.64	462.03	778.08	599.01		621.99	1410						1.0076	0.86856
																						1420						457.41	484.74	679.51	468.83	409.91	563.48	606.09	432.18	512.69	463.45	781.75	595.5		627.48	1420						0.88095	0.85917
																						1430						478.91	485.41	688.08	466.95	422.93	568.08	584.66	425.69	498.82	472.08	772.28	578.43		643.04	1430						0.91351	0.96377
																						1440						469.87	495.82	682.42	459.77	432.35	556.39	601.14	427.94	508.02	468.88	765.77	588.03		620.65	1440						0.94869	0.98798
																						1450						475.26	492.09	674.87	462.96	428.88	544.71	598.31	433.18	492.3	454.57		575.45		637.11	1450						0.98397	0.78917
																						1460						453.72	492.28	672.37	464.69	429.86	551.27	594.34	428.46	499.41	471.77		574.69		662.59	1460						0.86151	0.94226
																						1470						447.31	481.78	667.46	460.46	426.17	558.13	586.4	437.42	500.93	460.78		561.73		631.75	1470						0.681	0.87149
																						1480						467.2	484.69	654.8	451.43	434.49	548.72	590.75	435.79	509.41	476.94		591.45		636.3	1480						0.95986	0.86907
																						1490						471.02	483.82	666.54	446.01	425.92	536.56	593.25	430.98	496.85	469.05		585.34		641.76	1490						0.94113	0.83445
																						1500						470.07	461.59	664.65	460.25	411.02	539.08	590.85	432.39	496.05	467.53		564.32		626.49	1500						0.8756	0.82355
																						1510						465.79	479.5	658.15	455.83	428.53	527.62	584	442.67	486.72	469.22		576.42		633.25	1510						0.96895	0.84002
																						1520						471.54	475.51	657.55	449.23	428.26	528.98	585.75	443.58	489.55	467.57		574.09		650.18	1520						0.82606	0.76817
																						1530						465.82	466.21	649.87	455.4	421.28	539.42	602.91	434.71	497.84	471.88		573.65		670.94	1530						0.75097	0.72512
																						1540						469.5	466.74	664.18	452.2	418.62	540.71	581.87	438.94	488.31	455.22		601.01		659.21	1540						0.75907	0.7008
																						1550						459.97	476.67	643.91	455.38	416.05	533.33	600.5	432.47	478.09	459.12		596.51		655.85	1550						0.77384	0.72876
																						1560						446.35	482.21	643.46	451.36	425.69	521.8	604.7	449.01	497.31	470.77		603.68		662.12	1560						0.78018	0.76921
																						1570						454.09	476.95	648.23	473.05	407.91	524.55	608.32	429.84	495.93	470.55		600.18		644.02	1570						0.6904	0.88906
																						1580						459.72	465.06	638.56	454.82	405.83	518.69		440.77	503.61	465.81		589.8		642.31	1580						0.80088	0.75418
																						1590						456.01	476.55	643.94	452.91	421.01	521.97		438.53	499.71	467.08		589.51		637.39	1590						0.86988	0.80399
																						1600						440.01	465.61	640.68	459.13	428.99	530.25		446.95	508.51	477.35		599.89		644.57	1600						0.81584	0.77596
																						1610						443.12	460.35	627.59	455.18	404.73	512.52		428.89	497.5	465.69		609.23		640.26	1610						0.87862	0.76105
																						1620						463.61	461.49	641.02	456.52	411.51	528.21		440.73	488.43	482.75		602.26		651.67	1620						0.82344	0.74648
																						1630						467.3	476.2	632.51	457.07	419.44	526.07		445.43	497.41	461.78		591.01		641.17	1630						0.76787	0.69541
																						1640						462.97	455.32	628.3	454.45	422.27	502.68		447.87	489.91	476.13		584.73		651.28	1640						0.62583	0.81931
																						1650						447.44	487.7	631.68	448.72	414.51	529.03		434.04	504.97	455.94		597.84		637.97	1650						0.69226	0.74932
																						1660						450.11	464.28	644.88	456.55	426.68	514.63		420.93	500.53	481.58		589.81		622.91	1660						0.85926	0.73353
																						1670						447.63	467.55	628.49	457.72	416.33	525.43		432.73	506.27	475.92		603.66		612.65	1670						0.84217	0.73244
																						1680						446.4	491.84	629.01	453.9	419.8	515.3		437.88	487.73	464.64		579.37		609.03	1680						0.81346	0.72083
																						1690						457.51	460.66	624.01	444.01	425.57	523.64		431.85	506.53	475.49		582.39		619.33	1690						0.85529	0.77655
																						1700						463.22	471.46	622.45	450.8	407.72	516.11		449.31	512.08	466.4		582.69		615.8	1700						0.64198	0.79072
																						1710						465.75	465.53	616.59	457.51	411.69	502.34		451.85	494.51	469.06		584.36		623.19	1710						0.73002	0.79242
																						1720						453.08	478.01	625.11	456.41	409.8	512.64		451.03	508.67	465.37		588.59		627.67	1720						0.75324	0.87691
																						1730						456.37	470.52	632.77	450.7	400.49	514.63		457.91	514.04	459.94		569.63		604.97	1730						0.69371	0.77744
																						1740						457.31	480.55	615.33	452.85	410.46	517.46		457.26	502.18	474.44		568.49		614.49	1740						0.61387	0.68117
																						1750						446.82	473.54	613.85	437.91	415.54	527.99		436.69	508.37	471.98		571.76		607.9	1750						0.69259	0.76805
																						1760						450.99	470.1	617.47	441.65	417.1	528.16		452.3	523.3	465.88		579.7		626.24	1760						0.57982	0.74632
																						1770						454.59	460.42	650.76	438.03	410.65	508.02		446.11	507.6	475.41		575.76		608.42	1770						0.6155	0.70981
																						1780						465.33	470.33	659.24	438.9	412.23	522.53		431.29	528.41	475.1		566.55		621.38	1780						0.75229	0.7694
																						1790						442.58	466.11	644.82	450.16	415.61	498.31		452.55	523.06	474.54		574.77		610.62	1790						0.80222	0.65845
[truncated: 54 more columns]

## Sheet: Suppl. Figure 2
Suppl. Figure 2B		opto			ctrl		Suppl. Figure 2D		opto		unattached	Suppl. Figure 2E		opto			ctrl		Suppl. Figure 2F		opto			ctrl		opto			ctrl			Suppl. Figure 2G	opto		ctrl		Suppl. Figure 2H	Untreated	PRC1 siRNA	Suppl. Figure 2I	Untreated	PRC1 siRNA	Suppl. Figure 2J	Untreated	PRC1 siRNA
	t=0	t=20	t=30	t=0	t=20	t=30		t=0	t=20	t=30	-		t=0	t=20	t=30	t=0	t=20	t=30			t=20			t=20		t=30			t=30				t=0	t=30	t=0	t=30	n (measurement)	107	333	n (measurement)	107	333	n (measurement)	75	202
n (measurement)	290	240	228	269	227	133	n (measurement)	226	186	178	188	n (measurement)	290	240	228	269	227	133	n (measurement)	240			227			86			48			n (measurement)	108	86	85	48		dEQ (µm)	dEQ (µm)		alphaKC (º)	alphaKC (º)		dKC (µm)	dKC (µm)
	dEQ (µm)	dEQ (µm)	dEQ (µm)	dEQ (µm)	dEQ (µm)	dEQ (µm)		dKC (µm)	dKC (µm)	dKC (µm)	dKC (µm)		alphaKC (º)	alphaKC (º)	alphaKC (º)	alphaKC (º)	alphaKC (º)	alphaKC (º)		dEQ (µm)	alphaKC (º)	dAX (µm)	dEQ (µm)	alphaKC (º)	dAX (µm)	PRC1 dEQ (µm)	alphaPRC1 (º)	PRC1 dAX (µm)	PRC1 dEQ (µm)	alphaPRC1 (º)	PRC1 dAX (µm)		alphaKC (º)	alphaKC (º)	alphaKC (º)	alphaKC (º)		0.0825484	0.484193		9.02516	2.59323		0.8229	0.7982
	0.913287	0.124389	0.948798	0.192079	0.826821	0.0233149		0.7553	0.81174	0.76194	0.607394		7.53217	21.0356	10.2425	6.74259	26.3037	12.048		0.124389	21.0356	6.52464	0.826821	26.3037	6.92722	0.0840015	23.0713	5.66474	0.673559	28.1804	3.22623		5.23229	23.0713	14.8191	28.1804		0.23843	0.037294		19.0408	20.3597		0.8432	0.9008
	0.0136523	1.23225	1.36191	0.463329	0.499838	0.0994768		0.68724	0.73123	0.8134	0.669727		6.03264	9.80892	25.2324	6.82785	8.01513	18.6177		1.23225	9.80892	5.95926	0.499838	8.01513	4.14087	0.223289	25.3273	4.45785	0.550702	22.214	4.8517		2.62745	25.3273	10.1337	22.214		0.926386	0.586504		6.66539	2.37499		0.6897	0.7167
	1.48854	0.543165	0.172755	0.996785	0.0528213	0.331744		0.90304	0.8466	0.6142	0.664		7.24631	21.6652	20.9237	51.9151	47.409	1.26368		0.543165	21.6652	3.83817	0.0528213	47.409	2.32789	0.696865	27.8341	4.59957	1.51604	4.19935	2.44433		15.5161	27.8341	5.13837	4.19935		1.55532	0.619271		12.0714	3.07148		0.8174	0.9411
	0.584308	0.710812	0.087425	1.19941	0.171062	2.02137		0.78601	0.86071	0.69637	0.641756		46.6314	23.417	23.747	1.62527	3.44121	37.6514		0.710812	23.417	2.48691	0.171062	3.44121	1.6604	0.571373	71.9807	2.67811	1.20883	13.988	1.31678		8.29806	71.9807	3.7408	13.988		0.577088	0.37441		39.606	3.13888		0.7518	0.9754
	0.894907	3.11581	0.504111	0.78712	0.106221	0.848583		0.65985	0.61918	0.72791	0.768746		8.47364	11.4304	1.2699	1.38752	23.2703	10.5069		3.11581	11.4304	2.32837	0.106221	23.2703	5.54011	1.2448	8.96595	7.46454	0.714656	24.315	5.57482		23.6676	8.96595	15.4238	24.315		1.67543	0.552231		17.6744	5.52086		0.8822	0.8334
	0.346669	1.4044	1.97879	0.268594	2.54929	2.08269		0.75281	0.79846	0.72542	0.78103		37.6634	13.0789	11.5344	30.6179	0.957501	34.4427		1.4044	13.0789	1.29285	2.54929	0.957501	3.40189	1.21774	7.43224	5.60966	0.723818	10.9562	4.13224		14.8325	7.43224	4.56735	10.9562		0.172334	0.3524		3.47967	3.01156		0.7336	0.8134
	0.637083	0.165709	0.154718	0.363557	3.53128	0.157986		0.65238	0.6308	0.80427	0.761193		29.1022	21.8456	8.39491	0.998429	35.9124	72.8266		0.165709	21.8456	1.81487	3.53128	35.9124	4.24842	0.756729	2.12499	3.31729	0.243139	28.9408	1.89908		10.6821	2.12499	4.22375	28.9408		1.37929	0.488519		15.3791	3.24802		0.6255	0.8208
	0.200489	3.18262	1.67513	1.22518	3.59601	0.802383		0.82502	0.8134	0.85656	0.567637		2.94498	12.5745	24.1036	14.1918	44.1099	6.96831		3.18262	12.5745	1.83668	3.59601	44.1099	2.85905	1.93541	23.8898	6.78507	0.683738	3.54686	1.48421		10.0789	23.8898	3.01764	3.54686		0.22855	0.625443		3.18858	10.7335		0.8939	0.6755
	0.954839	0.756945	0.288487	0.573293	1.7008	0.395679		0.68309	0.7055	0.66898	0.666324		28.1135	0.810739	78.1105	19.4669	21.2915	28.9118		0.756945	0.810739	5.4265	1.7008	21.2915	4.38925	0.0926793	11.4101	3.65911	2.31201	11.9965	3.36582		6.35599	11.4101	0.585875	11.9965		1.23491	0.657034		4.70627	3.23056		0.6972	1.0039
	0.0161765	1.65525	0.839811	0.0822579	0.0235789	0.870109		0.798045	0.822613	0.7138	0.655866		2.31562	13.6617	8.86454	12.6487	45.9575	33.5407		1.65525	13.6617	5.07327	0.0235789	45.9575	6.561	0.676848	11.8433	1.60466	0.568415	19.4082	2.99202		20.1204	11.8433	5.00513	19.4082		0.860326	0.511489		16.7067	0.752939		0.7677	0.6869
	0.958051	0.586619	1.78631	1.30392	1.82811	0.0315975		1.02032	0.607394	0.62582	0.5561		17.0509	24.0908	21.9287	46.3875	22.5411	18.9099		0.586619	24.0908	4.14232	1.82811	22.5411	1.65197	0.121254	10.0536	1.41765	0.111362	37.1055	3.02196		34.6194	10.0536	20.8411	37.1055		1.47777	0.0662335		8.69977	0.412572		0.8341	0.807
	1.14397	0.258728	2.16289	0.417821	1.4961	0.285201		0.83	0.830498	0.88395	0.606813		8.48966	9.03566	44.295	8.47829	17.4775	13.4835		0.258728	9.03566	6.45752	1.4961	17.4775	2.89159	0.0811066	5.78648	2.69086	0.203404	40.2224	1.17087		18.4548	5.78648	2.04859	40.2224		0.495222	0.556958		7.77151	3.02975		0.8116	0.7202
	1.13915	0.0916946	0.656939	0.808438	1.77772	0.0460201		0.698279	0.659933	0.67562	0.749075		7.83557	5.58234	38.6753	1.38752	0.957501	1.26368		0.0916946	5.58234	6.14365	1.77772	0.957501	1.34267	1.00267	6.9361	4.83562	0.613688	2.64658	3.07652		40.2218	6.9361	5.61051	2.64658		1.28355	0.784604		58.4819	3.6371		0.8309	0.6031
	0.84374	1.30834	0.0428183	0.555492	1.31493	0.356718		1.01733	0.80925	0.8134	0.691639		26.4057	3.02923	50.6686	4.24992	2.05529	3.93357		1.30834	3.02923	5.11781	1.31493	2.05529	5.93679	0.557085	25.314	3.28099	0.722128	5.38763	4.21734		3.31978	25.314	0.745997	5.38763		0.182395	1.51214		13.3177	4.29253		0.9994	0.5606
	0.148209	1.4312	1.92463	2.59981	0.296816	0.184698		1.01733	0.61337	0.81589	0.554025		3.90114	10.193	26.2868	35.0776	16.4816	1.26368		1.4312	10.193	5.05521	0.296816	16.4816	3.38045	0.106166	30.1703	2.56676	1.09493	26.1206	2.74505		5.45149	30.1703	3.82793	26.1206		0.18111	0.720843		16.7241	2.56594		0.8857	0.6784
	0.46553	1.60662	0.0036278	2.47807	0.911081	0.832751		0.792235	0.75945	0.88976	0.721436		9.89595	5.91352	60.8044	1.38752	57.613	31.3376		1.60662	5.91352	3.79073	0.911081	57.613	1.88567	0.0467025	7.42382	2.60654	0.0928506	4.93495	3.16663		3.29063	7.42382	16.608	4.93495		0.0960065	1.63231		7.49364	43.5968		1.0516	0.6462
	1.10983	1.9067	1.78135	1.11708	0.817575	0.459539		0.816969	0.664	0.853323	0.691639		4.70242	12.1021	19.7049	1.38752	14.6848	29.6948		1.9067	12.1021	2.50643	0.817575	14.6848	2.45324	0.157614	34.0049	6.1978	0.509869	15.0633	4.0844		17.0709	34.0049	1.70817	15.0633		0.438415	0.504966		14.27	2.64067		0.7067	0.7895
	0.839474	0.812385	2.02999	1.84829	0.474178	0.597729		0.86652	0.6391	1.05808	0.666324		6.7063	9.58131	37.1076	4.4003	14.198	1.33356		0.812385	9.58131	1.77201	0.474178	14.198	1.77414	0.667983	24.9198	3.90225	0.416724	21.0855	3.5732		14.8634	24.9198	9.14796	21.0855		1.26786	0.830426		17.7722	28.6206		0.7985	0.5824
	2.00294	1.77366	2.2125	0.469573	0.0169364	0.642961		0.80842	0.75945	0.97276	0.641756		23.5556	27.4706	5.08397	27.6671	8.59131	1.269		1.77366	27.4706	0.866147	0.0169364	8.59131	6.39445	0.689264	17.4211	1.36543	0.336823	12.4279	1.65395		11.8067	17.4211	18.6105	12.4279		0.64013	0.43249		17.2837	5.34148		0.8754	0.7167
	1.61936	0.941826	1.16963	0.44706	0.276142	0.180336		0.74202	0.85075	1.09975	0.508624		32.8017	67.1932	6.49527	16.7796	6.55499	9.79977		0.941826	67.1932	1.10896	0.276142	6.55499	5.44074	0.987407	28.6797	4.41862	0.222635	18.5852	0.131109		22.3955	28.6797	1.51023	18.5852		1.10851	0.594204		37.8392	3.77548		0.7885	0.8517
	1.38099	2.10494	2.33431	0.0217748	0.903855	0.50313		0.75032	0.70052	0.77854	0.675454		13.883	15.0974	16.0135	25.8191	2.88117	1.269		2.10494	15.0974	0.629758	0.903855	2.88117	3.51268	0.229796	0.581904	4.39899	0.201183	16.6662	0.421889		8.62765	0.581904	12.6237	16.6662		1.04035	0.270776		1.14155	2.64067		0.7679	0.7813
	0.957852	0.599019	1.2146	0.896011	1.7956	2.29113		0.79846	0.79265	0.86486	0.456251		18.5517	61.6761	72.835	8.71633	0.154853	1.269		0.599019	61.6761	2.55895	1.7956	0.154853	3.70184	0.377913	3.36522	4.46416	0.147987	10.646	0.932988		7.34032	3.36522	15.2111	10.646		0.309935	0.0443785		4.20271	18.394		0.8807	0.7289
	0.736044	0.0881199	1.00939	0.149992	0.21765	0.615979		0.8217	0.60175	0.89225	0.717701		8.31976	19.0134	38.1977	0.745997	16.5444	16.085		0.0881199	19.0134	1.28371	0.21765	16.5444	3.88315	0.125822	24.6722	0.492916	0.0651336	16.4469	2.69997		14.0334	24.6722	8.37568	16.4469		0.625993	0.453449		3.24778	3.6371		0.7359	0.685
	0.475171	2.12728	1.29947	0.794755	0.575165	0.740646		0.78684	0.6972	0.9213	0.457994		18.5517	30.5371	21.5878	8.22663	0.154853	36.8067		2.12728	30.5371	2.0363	0.575165	0.154853	2.28754	0.459578	10.9319	1.94118	0.251416	4.93035	3.77565		8.58459	10.9319	31.5738	4.93035		1.46563	1.03334		23.0111	10.9041		0.8509	0.6031
	1.61114	0.13955	0.832612	0.40378	0.023554	0.781282		0.76526	0.664	0.85158	0.76526		6.23667	32.0342	34.4824	14.7822	6.97017	23.3546		0.13955	32.0342	4.14899	0.023554	6.97017	1.16542	0.03345	1.49548	3.51776	0.640475	17.3563	4.59848		8.95154	1.49548	27.3279	17.3563		1.04475	0.705845		12.5069	32.4966		0.871	0.7274
	0.29072	0.54743	0.523974	1.39516	0.270198	0.629175		0.82253	0.72044	0.92877	0.545642		3.61466	34.7909	9.32311	18.5441	18.5898	13.9861		0.54743	34.7909	5.10655	0.270198	18.5898	0.0372938	0.0197434	16.984	0.93731	0.0751431	33.9134	6.27224		13.259	16.984	8.41165	33.9134		1.24903	1.68792		8.35435	12.3852		0.9411	0.9186
	0.439462	1.71925	0.604828	0.462189	1.64081	0.635871		0.74285	0.89142	0.90968	0.825352		5.95443	12.3153	10.6582	10.5639	11.4648	1.269		1.71925	12.3153	2.97311	1.64081	11.4648	0.448591	0.330618	23.0904	2.07306	1.09794	25.5226	1.9683		17.8447	23.0904	4.22292	25.5226		0.365119	0.169133		0.618276	2.56594		0.7909	0.8015
	2.96763	0.901104	1.30514	0.190841	0.355777	0.484204		0.85407	0.5727	0.92711	0.791322		8.31976	49.3867	20.2324	5.26301	0.154853	13.4039		0.901104	49.3867	5.20008	0.355777	0.154853	1.24752	0.216235	7.43427	4.24723	0.46724	3.2997	6.16205		11.5947	7.43427	12.2218	3.2997		1.41211	0.965633		5.72192	2.87012		0.9483	0.6698
	0.77206	0.332129	0.583835	0.242549	1.02129	1.06815		0.84162	0.56025	0.78435	0.645325		21.9453	20.6606	3.39491	7.78477	3.02498	3.58908		0.332129	20.6606	3.40743	1.02129	3.02498	1.55002	0.730928	16.4147	3.28764	0.759756	9.19982	5.74855		17.6092	16.4147	17.6085	9.19982		0.552679	0.129037		12.7742	2.9861		0.9864	0.7045
	0.932091	3.73246	0.547351	0.553773	0.197517	0.412914		0.82336	0.82004	0.73372	0.78103		13.1479	78.2822	31.7561	1.98032	20.6996	13.905		3.73246	78.2822	2.9908	0.197517	20.6996	3.56607	0.758974	4.1712	3.04048	0.301834	13.1955	4.13234		11.9568	4.1712	21.0336	13.1955		0.414976	0.509283		20.0583	13.4437		0.9263	0.8426
	0.95513	3.005	1.50414	1.90052	0.403278	0.260554		0.75613	0.875484	0.963547	0.592122		25.6767	29.7347	34.4824	4.9646	15.679	0.409249		3.005	29.7347	2.80883	0.403278	15.679	3.2117	0.867461	37.1505	1.79578	0.41206	16.4833	3.58831		10.2049	37.1505	28.97	16.4833		0.55962	0.046183		14.0026	14.4488		0.8555	0.7289
	0.289765	0.230156	2.35097	0.505738	1.21247	0.446855		0.82585	0.73289	0.783022	0.508624		0.888347	26.942	24.2909	25.8191	18.2801	29.2201		0.230156	26.942	3.67786	1.21247	18.2801	4.23282	0.146443	29.9422	0.289069	0.220274	20.8821	2.13365		6.63847	29.9422	4.19698	20.8821		0.593953	1.18712		18.5607	19.6433		0.9058	0.7679
	0.132263	1.4167	0.122281	1.95331	0.0791862	0.20542		0.91383	0.8964	0.816969	0.526386		5.82149	7.08678	3.44405	13.9976	0.154853	0.409249		1.4167	7.08678	2.52667	0.0791862	0.154853	6.13833	0.319756	9.12184	3.15016	0.576311	13.6004	6.7321		25.914	9.12184	1.33243	13.6004		0.476774	1.35306		13.1471	1.94182		1.0251	0.7811
	0.055865	1.12662	0.0894811	1.0373	0.11861	0.304721		0.97442	0.7055	0.864362	0.470361		10.4216	36.2146	0.792343	0.745997	1.37461	0.409249		1.12662	36.2146	1.16116	0.11861	1.37461	5.44293	0.858892	18.0949	4.68724	1.37404	0.507029	6.01002		22.24	18.0949	17.1935	0.507029		0.592759	0.269078		13.1471	0.698959		0.7985	0.8392
	1.20505	1.0484	0.742823	0.619367	0.199575	0.00444632		0.88312	0.905862	0.85407	0.657609		14.6747	9.46722	7.63463	10.754	0.746483	0.409249		1.0484	9.46722	1.73573	0.199575	0.746483	4.38045	1.78646	4.17199	1.65298	0.715836	8.17345	4.79392		27.7175	4.17199	7.31134	8.17345		0.6406	0.0168744		14.1253	1.26277		0.9551	0.8449
	0.310431	0.325713	1.08395	0.17636	0.0847501	0.57728		0.913	0.767999	0.900799	0.806594		10.0482	26.942	8.55751	9.11981	25.8186	7.25202		0.325713	26.942	1.19146	0.0847501	25.8186	3.26356	1.38104	4.88523	0.187022	0.38167	2.62813	3.39677		16.4517	4.88523	8.86688	2.62813		0.267644	0.869931		17.8167	0.944476		1.0761	0.8158
	1.53746	0.0626582	1.00162	0.226988	2.07962	0.566609		0.83996	0.83249	0.699939	0.669146		27.8158	64.6062	53.387	1.74356	0.746483	6.74944		0.0626582	64.6062	0.172958	2.07962	0.746483	1.46339	2.33965	11.214	7.54478	0.895457	11.3743	1.91916		7.93256	11.214	20.425	11.3743		0.280333	0.323641		6.97637	1.34499		0.9279	0.7202
	0.266752	0.047096	1.56667	0.311656	0.241815	0.388904		0.91466	0.91715	0.913415	0.721436		2.60573	24.6047	45.7924	0.745997	0.746483	0.409249		0.047096	24.6047	0.615661	0.241815	0.746483	2.42038	0.106729	5.54413	6.64264	0.804321	8.68992	0.386224		28.9978	5.54413	19.5949	8.68992		0.73285	0.0248913		14.6545	2.33587		0.8594	0.8924
	1.98073	0.287814	0.0126687	0.344291	0.383065	0.482425		0.95533	0.65985	1.07651	0.618682		52.1748	12.5345	71.1385	24.7085	0.746483	2.3184		0.287814	12.5345	5.73316	0.383065	0.746483	3.70515	0.953244	24.9052	4.51727	0.100719	16.8926	0.777001		3.08084	24.9052	1.28424	16.8926		0.059858	0.633134		0.618276	1.84905		0.8486	0.9115
	1.21485	0.0112786	1.3856	0.139348	0.339203	0.863623		0.55942	0.7719	0.83	0.721436		12.7379	0.961249	31.3206	12.5143	16.7791	17.4096		0.0112786	0.961249	4.8984	0.339203	16.7791	5.11684	2.17588	1.33267	3.62417	0.678389	13.5162	0.99971		0.597863	1.33267	21.6486	13.5162		1.42771	0.111956		2.95806	2.22473		0.783	0.7481
	1.94358	0.257459	0.453657	0.00544158	0.0822495	0.778698		0.664	0.59013	0.680517	0.586229		10.2647	5.19765	5.87921	34.9779	11.1422	0.409249		0.257459	5.19765	5.06855	0.0822495	11.1422	5.04817	0.210145	12.8386	6.51725	0.718049	29.3489	5.68462		34.3528	12.8386	11.5135	29.3489		1.09483	0.699071		8.84405	1.2089		1.0527	0.8074
	0.844328	1.06082	1.32129	0.578092	0.0861018	0.99313		0.98853	0.67811	0.7304	0.570376		19.9682	9.04673	8.77755	16.0947	7.01869	0.973205		1.06082	9.04673	4.18966	0.0861018	7.01869	3.15981	1.08612	29.8401	7.20813	0.528484	6.16233	5.62917		18.2135	29.8401	4.73978	6.16233		0.066213	0.364907		2.07602	1.73453		0.8617	0.6552
	0.62993	0.678109	0.163012	0.229402	0.173555	0.325748		0.73787	0.769244	0.724092	0.594031		29.4882	39.6401	3.69757	10.4674	12.0578	7.1569		0.678109	39.6401	3.49839	0.173555	12.0578	0.790731	0.770622	8.8772	6.12275	0.0635178	10.4573	3.87591		24.4257	8.8772	7.86083	10.4573		0.40707	0.214972		11.0953	1.57773		1.0472	0.7788
	0.169531	0.251332	0.194838	0.961509	0.182949	1.32572		0.73787	0.79265	0.736708	0.744925		15.6887	18.4788	24.5164	7.42245	24.5997	21.8605		0.251332	18.4788	3.23376	0.182949	24.5997	0.0809654	0.0484826	0.378434	5.07377	0.84264	9.22956	3.34277		34.8671	0.378434	16.7307	9.22956		1.04822	0.480528		33.4755	1.5695		0.6916	0.7942
	3.20374	0.630558	0.848374	0.294824	0.56196	0.286654		0.71961	0.70882	1.0385	0.575688		10.363	6.80392	11.4691	2.70222	22.0872	34.0188		0.630558	6.80392	2.33502	0.56196	22.0872	2.84589	0.158615	6.60519	2.97948	0.181777	27.9203	3.79014		8.34723	6.60519	22.1653	27.9203		0.376373	1.47935		5.22574	1.39679		0.8735	0.9842
	0.401775	0.0828491	0.224349	0.633425	0.481467	0.764048		0.7553	1.02588	0.889179	0.771734		2.75611	17.6605	8.06139	2.70222	12.0578	5.36699		0.0828491	17.6605	1.86967	0.481467	12.0578	4.88672	0.0569054	8.03465	1.294	0.766742	19.7694	3.40754		15.9985	8.03465	13.5121	19.7694		0.891777	0.632606		19.0755	1.65223		0.9917	0.9483
	0.930652	0.178021	0.511686	0.75907	0.0125706	0.287918		0.88976	1.00388	1.0546	0.696619		41.4426	7.56952	21.1166	5.19178	17.4457	16.6251		0.178021	7.56952	1.14492	0.0125706	17.4457	2.43255	1.5004	0.322571	0.505752	0.626027	13.7082	4.72563		23.8068	0.322571	8.19783	13.7082		0.204157	0.580631		6.92443	2.09035		0.9455	0.7699
	1.86895	0.637033	0.501188	0.198526	0.53398	0.751877		0.7138	1.04331	0.612457	0.657609		9.75131	0.961249	36.8838	21.1372	0.746483	0.235548		0.637033	0.961249	1.48404	0.53398	0.746483	1.80794	0.133651	5.33216	1.15847	0.105526	34.9178	2.29815		3.51734	5.33216	0.559338	34.9178		1.93518	0.835891		2.64782	0.972139		0.8414	0.8057
	1.29143	0.554462	0.168468	1.3116	0.00520396	0.178709		0.85158	0.83249	0.744925	0.630883		24.5185	10.9274	0.684779	14.797	24.4546	4.99919		0.554462	10.9274	0.963416	0.00520396	24.4546	4.16675	1.45519	7.34807	4.66464					5.05944	7.34807	1.78079			0.361685	0.422108		0.21459	0.996558		0.8304	0.7702
	0.302391	0.72935	2.05414	0.047568	0.488361	1.23448		0.98023	0.99185	0.968693	0.705334		4.13767	7.30144	4.3112	21.9923	15.9528	19.2045		0.72935	7.30144	1.67195	0.488361	15.9528	4.14039	1.15291	11.1429	6.33641					6.32379	11.1429	1.3328			0.155041	0.963644		17.311	13.4061		1.1944	0.8803
	0.0762606	1.01494	0.746501	0.581455	0.415115	0.431566		1.07568	0.710397	0.858967	0.659933		3.89712	24.9237	27.2236	5.30478	3.26016	20.802		1.01494	24.9237	1.96728	0.415115	3.26016	3.36747	0.59172	5.3937	5.588					15.7672	5.3937	16.2945			1.31175	0.511425		22.6191	17.9226		0.8486	0.9554
	0.375177	0.63209	0.722414	0.372534	0.595138	0.436429		0.98023	0.91798	0.664581	0.537176		0.497546	18.6114	0.658543	2.70222	6.20216	6.94539		0.63209	18.6114	2.52119	0.595138	6.20216	2.78072	0.342926	42.258	1.53545					12.8367	42.258	1.39633			0.336505	0.288228		0.21459	19.7633		0.8212	0.8737
	0.628252	0.236294	0.110393	0.638622	0.729795	0.525079		0.88727	0.86569	0.618682	0.749075		10.2257	11.7456	3.57785	10.8682	3.26016	21.015		0.236294	11.7456	3.56502	0.729795	3.26016	2.13733	2.12803	19.3862	2.39128					10.1109	19.3862	12.3352			0.650521	1.30082		8.52151	0.768919		0.8594	0.8788
	0.551848	0.0834757	1.3441	1.26703	0.604841	0.695684		1.09311	0.88229	0.846434	0.570376		7.92912	1.76506	6.36914	15.7327	12.2328	26.3295		0.0834757	1.76506	4.29673	0.604841	12.2328	4.97758	1.04264	16.2895	3.68217					9.75485	16.2895	12.6532			0.473305	1.12201		9.54851	7.43424		0.8581	0.8581
	0.00686103	1.69614	2.49625	1.37917	0.0652961	0.310544		0.99351	0.89225	0.792235	0.831826		0.497546	2.91084	9.74882	4.54983	7.83408	8.00072		1.69614	2.91084	6.12248	0.0652961	7.83408	6.42248	1.12793	9.25222	3.81905					11.3286	9.25222	0.843363			0.446737	0.57794		9.54851	0.78897		0.781	0.7309
	0.357565	1.53633	0.424962	0.39041	0.360046	0.415743		0.79265	0.763185	0.755134	0.752644		29.486	10.3422	14.051	0.196218	11.3903	11.6531		1.53633	10.3422	4.6139	0.360046	11.3903	7.68684	0.119197	10.2868	4.6274					5.3829	10.2868	8.27791			0.42277	1.23848		31.3356	6.43246		0.8661	0.8486
	1.03476	0.842276	0.407369	0.627257	1.45146	0.270164		1.06904	0.830498	0.657609	0.607394		17.7385	15.5241	1.63207	3.37605	3.26016	17.0729		0.842276	15.5241	4.85696	1.45146	3.26016	1.97737	2.98046	14.6591	1.26157					2.32235	14.6591	6.28737			0.574513	0.892058		19.1913	19.9876		0.7182	0.664
	1.22891	0.282047	0.0188684	0.36227	0.196413	1.019		0.9213	0.913415	0.80676	0.705334		7.35437	10.676	11.2301	0.196218	3.26016	6.61876		0.282047	10.676	3.58442	0.196413	3.26016	2.62495	1.16188	26.5615	4.80416					6.52163	26.5615	13.1161			0.965989	0.0116845		20.9812	9.29035		0.7526	0.8523
	1.72413	0.842276	1.97449	0.636495	0.634604	0.682327		0.9711	0.825352	0.74285	0.708571		1.92825	17.6452	51.7729	1.59369	3.26016	9.78528		0.842276	17.6452	3.63113	0.634604	3.26016	4.84463	0.857061	8.22323	3.30214					20.1344	8.22323	2.67111			0.324918	0.911379		14.1488	52.5389		0.7351	0.941
	0.749083	1.23145	1.04771	0.994573	0.57618	0.0747513		1.12465	0.759699	0.84411	0.684999		22.6048	23.6542	53.09	0.196218	0.255498	27.9982		1.23145	23.6542	2.07443	0.57618	0.255498	6.08002	0.469656	13.7642	4.02148					1.90543	13.7642	0.958053			1.17607	1.14864		22.4423	0.729287		0.9333	0.8056
	1.05519	0.528267	1.06888	0.637561	0.0998107	0.186878		0.835146	0.630883	0.83415	0.68724		3.67896	21.0517	4.53589	0.196218	8.13011	7.93767		0.528267	21.0517	2.35894	0.0998107	8.13011	3.79605	1.05077	6.70702	2.25083					10.3011	6.70702	6.16162			1.77592	0.489479		0.756336	13.3429		0.6754	0.8304
	0.532757	2.89844	0.591666	0.696897	0.584605	1.41998		0.910178	0.830498	0.86901	0.62416		10.7996	30.8081	9.08552	10.6877	15.0304	11.4323		2.89844	30.8081	0.0639259	0.584605	15.0304	1.16014	0.0763884	24.7733	4.75454					3.06622	24.7733	3.78537			0.781926	0.454989		13.9872	0.64		0.8323	0.9146
	0.52986	2.04282	0.0400387	0.481653	0.245638	0.728237		1.07095	0.815309	0.75198	0.543567		0.778029	8.3991	28.5558	0.196218	26.0177	10.8206		2.04282	8.3991	1.62414	0.245638	26.0177	2.16667	0.513447	4.64351	3.14288					10.1905	4.64351	1.21949			0.270411	0.535845		13.8645	0.745999		0.6833	0.7796
	0.266418	2.79026	0.134983	0.221285	0.682472	0.697924		0.817467	0.724756	0.71629	0.592122		12.8937	5.83533	6.84147	0.196218	20.4591	10.8206		2.79026	5.83533	3.24828	0.682472	20.4591	5.33598	0.0502505	6.45308	2.26406					24.5545	6.45308	9.97485			1.33836	1.07476		22.7422	0.626038		0.8749	0.8414
	0.3723	1.57848	0.790642	0.947388	1.22754	0.104917		0.92794	0.734218	0.71297	0.528544		6.22625	38.7227	4.78059	0.196218	1.78991	24.3885		1.57848	38.7227	3.9332	1.22754	1.78991	3.1732	0.20704	3.94113	0.688793					5.28097	3.94113	5.23336			0.696331	0.254778		15.4999	16.6624		0.7304	0.8792
	0.378182	0.45556	0.0122563	0.982421	0.399243	1.06683		0.983799	0.798294	0.89308	0.490281		3.22473	60.5241	3.21246	13.1963	1.78991	11.4323		0.45556	60.5241	4.32272	0.399243	1.78991	1.90159	0.332828	2.96147	2.96198					0.543072	2.96147	4.5764			0.028349	0.294763		0.756336	4.07015		0.9296	0.7791
	0.675786	0.729528	0.0943527	0.69441	0.3623	0.364486		0.762936	0.734218	0.93209	0.5146		43.4611	35.749	12.2366	0.196218	0.936401	7.52249		0.729528	35.749	4.71541	0.3623	0.936401	6.21678	1.67666	13.8063	4.30197					4.58698	13.8063	11.0079			1.64191	0.332153		25.8087	24.3411		0.7474	0.6663
	0.201406	1.41199	1.22008	0.35559	0.342208	0.850223		0.783022	1.05642	1.01426	0.614283		17.7511	45.6655	14.9632	0.196218	1.78991	1.78991		1.41199	45.6655	5.18643	0.342208	1.78991	4.90952	0.476245	20.454	5.75481					18.1357	20.454	12.0014			0.110109	0.819954		4.33267	2.94012		0.8998	0.7278
	0.650276	1.66172	1.15959	0.303574	0.839317	0.30548		0.83	0.695706	0.73621	0.669727		1.53892	2.0589	12.7046	36.6737	9.55508	19.7434		1.66172	2.0589	6.79616	0.839317	9.55508	2.97423	1.68732	4.03698	5.2149					18.3815	4.03698	1.95366			1.23654	0.232708		57.6362	20.0429		0.7069	0.893
	1.18358	0.0832442	0.364096	0.274154	0.0596271	0.578587		0.78352	0.553693	0.860793	0.594031		19.3156	2.91084	10.787	0.196218	1.78991	3.1986		0.0832442	2.91084	6.80178	0.0596271	1.78991	1.18152	0.190708	4.61973	0.279784					12.1813	4.61973	6.72399			0.0271011	1.98667		1.38289	25.4226		0.8594	0.7324
	1.34921	1.06848	1.31577	0.0306797	1.32865	0.0120662		0.999486	0.665328	0.96114	0.636942		9.77102	30.7792	15.3965	1.38303	1.78991	10.4973		1.06848	30.7792	8.2647	1.32865	1.78991	0.0622196	0.0889111	11.4097	1.67665					5.64478	11.4097	11.4972			0.92883	0.718053		21.462	6.20301		1.0564	0.7922
	0.0180046	0.0446076	0.689122	0.0786844	0.528867	0.557986		0.855564	0.686908	0.7553	0.776631		19.7116	18.3397	6.20097	6.27144	3.17983	25.7524		0.0446076	18.3397	7.27315	0.528867	3.17983	1.04218	1.82094	1.84139	1.49429					12.9158	1.84139	2.07326			0.118892	0.531444		17.836	31.5817		0.7835	1.1285
	0.472668	0.218472	2.03057	0.968107	1.12125	0.116653		1.15602	0.789579	0.67562	0.519829		7.24951	14.2208	7.09286	5.89939	12.5742	20.1719		0.218472	14.2208	8.24082	1.12125	12.5742	0.0557384	1.47103	4.2153	1.7051					8.0675	4.2153	2.80604			0.584595	0.268701		12.9374	2.74482		0.9213	0.7309
	1.51122	0.358617	1.30484	0.860187	0.300728	0.429436		0.967946	0.76526	0.911091	0.779121		22.6888	20.4364	13.2662	0.588325	17.045	15.3109		0.358617	20.4364	9.55833	0.300728	17.045	3.7066	1.43705	12.4174	3.73573					20.5824	12.4174	43.7029			0.63071	0.899187		28.3778	2.63321		0.83	0.8924
	0.482575	0.659982	1.39007	0.315027	0.109532	0.787176		0.801531	0.846434	0.87067	0.691639		1.1874	29.3648	18.8734	4.93922	12.6754	33.0841		0.659982	29.3648	10.7947	0.109532	12.6754	2.90293	0.0144684	24.017	5.53565					0.543072	24.017	44.1534			0.272971	0.662896		15.6693	11.1685			0.9363
	0.257035	1.06321	0.306762	0.884153	1.48225	0.642411		0.840292	0.839296	0.78103	0.627231		41.8245	8.85745	15.9961	23.3742	0.255498	22.8801		1.06321	8.85745	10.82	1.48225	0.255498	6.09039	0.337879	6.5737	5.12336					4.52916	6.5737	18.4841			0.784213	0.467228		8.23324	33.1877			0.745
	0.886342	0.429919	1.21653	0.0612151	0.267674	0.179629		0.846434	0.792816	0.87399	0.669146		21.2947	42.0892	12.4633	21.2531	1.22288	29.6891		0.429919	42.0892	5.86151	0.267674	1.22288	5.23163	1.18804	12.8061	0.559397					5.74705	12.8061	0.173273			0.896397	0.224455		7.44388	18.1694			0.6102
	1.25333	0.617482	0.368739	1.65642	0.0790708	0.784354		0.627978	0.89391	0.816969	0.627231		5.8925	5.21927	28.5722	25.8637	1.78991	3.94107		0.617482	5.21927	1.25323	0.0790708	1.78991	2.63072	0.0908851	20.7575	1.27427					8.57964	20.7575	2.37536			0.540121	1.05967		9.89513	28.789			0.8346
	0.582324	0.802852	0.506873	0.330042	0.0622196	0.640692		0.684418	0.81008	0.751565	0.705334		26.5336	30.6167	8.17106	25.8637	1.78991	31.1473		0.802852	30.6167	5.11356	0.0622196	1.78991	2.50564	0.224907	40.4145	2.87502					15.2751	40.4145	17.918			0.070642	1.87551		32.9288	2.70142			0.9075
	0.0173511	1.62833	0.201447	1.56647	0.473777	0.896289		0.830996	0.705832	0.668565	0.664581		18.26	15.9653	21.5482	2.51971	2.29571	4.36167		1.62833	15.9653	3.20474	0.473777	2.29571	4.37806	0.286727	47.3939	1.85931					19.573	47.3939	14.6196			0.77204	0.39194		14.6874	4.51457			0.8268
	0.222238	0.28614	0.583842	0.380862	0.2586	0.411554		0.684418	1.04265	0.85407	0.450358		1.53892	1.38872	22.2064	13.5084	0.699643	23.9382		0.28614	1.38872	2.63536	0.2586	0.699643	5.52199	0.185898	43.8544	0.363405					24.2392	43.8544	4.21939			0.0898353	0.397549		1.00308	0.309117			0.8864
	0.31411	0.624077	1.09212	0.208766	0.98644	1.12205		0.60424	1.05012	0.873575	0.664581		19.5738	8.07361	5.12356	23.3742	1.78991	22.5507		0.624077	8.07361	2.7612	0.98644	1.78991	4.83952	0.298337	47.4511	1.8347					16.7478	47.4511	3.04221			0.603433	0.504037		13.1174	0.220154			0.9754
	0.0548859	0.252321	0.608089	0.325349	1.22754	0.343456		0.872496	0.90968	1.08713	0.64823		10.1332	18.9143	13.0426	22.3691	6.36383	7.05145		0.252321	18.9143	0.116166	1.22754	6.36383	3.91854	0.791255	36.2302	3.65121					10.2632	36.2302	18.7932			0.885201	0.110378		3.45968	0.28836			0.7247
	0.126091	0.495339	1.03808	0.576851	1.72271	0.726325		0.761857	0.893246	0.904617	0.724092		29.0938	22.6392	17.4985	35.0993	1.78991	34.9487		0.495339	22.6392	0.990553	1.72271	1.78991	1.46994	1.09165	7.56444	6.21872					6.33215	7.56444	4.94195			0.571357	0.346448		37.1389	6.1981			0.8667
	0.0214051	1.11074	0.542958	0.132897	0.218417	1.18465		0.738866	0.89308	0.7304	0.657609		8.0951	14.5567	20.9784	35.0993	4.08052	28.6662		1.11074	14.5567	0.165951	0.218417	4.08052	1.80048	0.310786	37.6285	1.41937					8.1587	37.6285	15.0768			0.704358	0.722973		24.4834	0.206043			0.6922
	0.195277	0.276083	0.0114094	0.230286	0.264162	0.195861		0.748162	0.82253	0.932671	0.657609		14.6873	15.425	13.792	1.98208	3.28088	6.04636		0.276083	15.425	4.62903	0.264162	3.28088	8.3083	0.562648	10.165	2.59122					10.4338	10.165				1.60176	0.0762884		2.14997	6.52929			0.9197
	0.348298	0.88105	0.00815682	1.17825	0.198583	0.941514		0.872496	0.7719	0.758288	0.627231		7.3609	15.714	9.60442	5.68494	0.418476	10.81		0.88105	15.714	3.64741	0.198583	0.418476	7.67903								1.13233					0.709482	1.41996		29.2058	8.69157			0.8607
	0.710457	1.25582	0.151365	0.157092	0.670169	0.11357		0.839296	0.7055	0.705334	0.583656		5.4147	14.5567	23.2345	0.430787	3.28088	1.07866		1.25582	14.5567	1.8936	0.670169	3.28088	6.84142								10.1287					0.72348	0.834022		6.56859	0.356563			0.7444
	0.227713	0.180912	1.26904	1.39609	0.558012	0.605579		0.761857	0.573945	0.706081	0.606813		24.6951	17.7903	3.11114	3.89556	35.3789	3.15774		0.180912	17.7903	3.78771	0.558012	35.3789	1.98438								5.30604					0.637803	1.01176		13.3916	0.28836			0.7982
	0.315187	0.0917374	0.127507	0.545177	1.02458	0.485686		0.815309	0.836391	0.709733	0.71131		22.4525	18.8453	7.43274	2.28197	29.8459	15.1149		0.0917374	18.8453	5.00036	1.02458	29.8459	0.390965								10.1971					0.769038	0.665311		11.6471	0.309117			0.7423
	0.532678	0.27525	0.464466	1.00895	0.25255	0.444585		0.748162	0.724092	0.711642	0.806594		5.35795	24.7687	10.7195	4.92537	13.2889	9.15016		0.27525	24.7687	4.25256	0.25255	13.2889	2.7287								10.1554					3.13914	0.832954		10.4471	0.356563			0.7821
	1.53333	0.578098	0.32007	0.46589	2.27177	0.353963		0.880381	0.76526	0.69388	0.798045		18.1766	19.735	11.1663	5.29399	27.5086	13.1482		0.578098	19.735	3.6545	2.27177	27.5086	2.29209								16.7121					0.120799	0.939306		8.5995	0.447499			0.7113
	0.179849	1.68143	0.610371	0.519709	1.5946	0.443015		0.96529	0.933335	0.830498	0.564317		5.68913	0.248156	3.32836	15.5127	3.28088	3.46623		1.68143	0.248156	2.82927	1.5946	3.28088	0.236585								4.96889					0.979701	0.896149		7.66795	7.24232			0.9406
	1.53522	0.104627	1.78977	0.136429	0.523706	0.525113		1.23255	0.774639	0.675537	0.846849		4.54337	6.958	3.64031	19.0082	53.8084	11.4754		0.104627	6.958	2.78094	0.523706	53.8084	1.15205								2.58102					0.656801	0.861743		5.47737	11.0746			0.8776
	0.270153	2.29992	0.97374	0.883602	0.192646	0.109352		1.01741	0.859465	0.625571	0.630883		40.2633	12.5129	11.9233	6.69225	8.02905	4.82094		2.29992	12.5129	2.21027	0.192646	8.02905	7.57545								4.06719					0.319393	1.75251		1.53777	14.2253			0.7672
	1.0586	1.42223	0.983205	1.03938	0.0234869	1.95498		0.89225	0.779121	0.701267	0.759699		20.5995	5.60786	2.14208	35.8958	3.28088	20.8443		1.42223	5.60786	0.782308	0.0234869	3.28088	2.72105								11.7445					0.577065	1.48694		7.6535	25.2743			0.7635
	0.0360234	1.258	1.28456	0.520583	0.559464	3.54434		0.89806	0.809914	0.394831	0.669146		6.66007	15.7723	12.3477	11.1628	25.0823	0.61939		1.258	15.7723	0.0153414	0.559464	25.0823	1.19387								9.45238					0.122915	0.763445		10.15	0.169			0.7055
	0.349949	0.462078	3.10146	0.870463	0.232929	0.82468		1.02173	0.686825	0.6972	0.744925		8.78117	12.0166	27.7731	4.11826	20.1453	19.6055		0.462078	12.0166	0.520796	0.232929	20.1453	1.84648								24.3208					0.356354	0.714741		5.93901	11.6996			0.7699
	0.678626	1.80531	2.4451	1.19727	0.670528	0.424173		0.80178	0.742352	0.779951	0.709152		7.11411	22.868	8.80292	13.9935	13.6255	24.8471		1.80531	22.868	1.81824	0.670528	13.6255	0.511969								5.51363					0.127532	1.60986		0.250294	30.7747			0.7472
	0.00240699	0.0649352	0.247465	0.361944	3.4044	0.150401		0.86569	0.847596	0.943876	0.625986		5.21934	6.33379	11.7665	7.726	16.1194	38.67		0.0649352	6.33379	2.42753	3.4044	16.1194	0.213147								2.52467					0.197602	0.0680021		1.53777	20.6654			0.7055
	0.705409	2.45386	1.36994	0.154528	0.0927404	1.18358		0.66566	0.631464	0.482645	0.721436		25.1252	17.4896	14.9077	0.600983	0.410716	25.3945		2.45386	17.4896	3.03969	0.0927404	0.410716	3.85695								28.4967					0.20924	0.0805479		7.55063	0.220154			0.8717
	0.148845	0.177772	0.976005	0.121519	0.352815	0.212535		0.74534	0.7553	0.76526	0.744925		6.36095	2.93168	14.4303	8.86134	0.410716	25.9656		0.177772	2.93168	3.8811	0.352815	0.410716	2.49061								24.8556					0.247463	1.20211		5.00773	26.9269			0.7262
	0.329843	0.235797	1.78457	0.823135	0.14889	1.00749		0.89142	0.581332	0.900882	0.636942		14.5226	20.6063	1.03775	13.5956	0.410716	18.145		0.235797	20.6063	4.85661	0.14889	0.410716	2.78363								11.6067					0.509542	0.432718		13.3084	13.7283			0.7262
	1.0604	0.430533	1.28547	0.363032	0.753302	0.347122		0.97525	0.656198	0.639183	0.598513		46.5147	4.32577	21.7959	0.600983	9.59727	15.326		0.430533	4.32577	5.39323	0.753302	9.59727	4.16744								5.6004					1.07657	1.53097		21.6758	6.90388			0.8094
	0.0665655	0.340434	1.95077	2.30907	0.656918	0.0942107		0.768912	0.752644	0.512525	0.659933		49.9735	64.735	16.6124	5.79541	19.5897	14.6556		0.340434	64.735	3.75435	0.656918	19.5897	4.28131								13.6408					0.667446	0.310898		23.0819	15.4998			0.6938
	0.715893	0.898753	0.285249	2.70424	0.801792	0.192683		0.76526	0.705583	0.772232	0.560167		5.78801	39.2547	36.8372	8.86134	0.410716	19.0543		0.898753	39.2547	5.5091	0.801792	0.410716	4.34988								20.0346					0.941586	1.54853		1.53777	14.9593			0.6685
	0.362906	0.255386	0.21714	0.636613	0.795694	0.186409		0.91466	0.748162	0.810329	0.768746		21.0295	25.091	5.80139	9.57361	7.84213	0.980554		0.255386	25.091	4.79738	0.795694	7.84213	3.49915								16.5397						0.483574			7.94568			0.7262
	2.23591	0.386531	1.35509	0.256894	0.288485	0.362484		0.837304	0.700022	0.846683	0.498747		34.771	9.31207	1.03775	7.726	0.410716	1.66146		0.386531	9.31207	5.37219	0.288485	0.410716	2.78065								15.1101						1.93154			3.66614			0.6651
	0.431638	0.717704	0.310245	0.380154	0.46809	0.177771		0.971847	0.655285	0.610299	0.717701		23.2776	4.36688	1.03775	5.57073	4.35293	7.36212		0.717704	4.36688	3.8473	0.46809	4.35293	4.57046														0.194377			1.96176			0.6068
	0.744086	0.232482	6.41846	1.14177	0.419527	1.48888		0.819293	0.748162	0.603161	0.763185		35.6167	0.550904	6.74835	23.4346	13.3792	3.50907		0.232482	0.550904	3.74128	0.419527	13.3792	5.64775														2.02473			5.03988			0.6073
	0.910139	0.2523	0.484248	1.07256	0.568727	1.82692		0.864777	0.71546	0.488372	0.519829		24.0068	23.6758	0.788426	0.600983	0.656029	1.06486		0.2523	23.6758	3.6768	0.568727	0.656029	4.17962														0.561088			2.03648			0.6459
	0.58417	1.26013	0.537641	0.131186	0.474329	0.368962		0.939477	0.851497	0.779702	0.534354		22.028	10.0109	9.70305	3.10325	0.656029	1.06486		1.26013	10.0109	2.70767	0.474329	0.656029	3.18464														0.517132			6.90388			0.5285
	0.158902	1.34335	0.390215	0.360387	0.992922	0.224073		0.955164	0.975499	1.00372	0.537176		16.9202	14.7049	0.788426	6.74808	0.656029	30.246		1.34335	14.7049	2.42837	0.992922	0.656029	1.72352														1.66679			21.4467			0.7444
	0.294787	0.548919	0.740267	0.517647	0.803929	0.121095		0.900799	0.610299	1.02173	0.567637		6.1192	11.4394	5.75817	0.376941	3.74167	32.7966		0.548919	11.4394	1.60451	0.803929	3.74167	4.54791														1.37759			6.22719			0.6453
	0.205145	0.891824	0.183306	0.628903	1.34379	1.94349		0.852327	0.631049	1.04248	0.67313		17.5237	65.6969	0.788426	2.34937	38.0027	0.177386		0.891824	65.6969	0.96531	1.34379	38.0027	5.45788														0.797458			20.557			0.8822
	1.90101	1.48752	0.983628	0.550273	1.1784	0.423542		0.859465	1.06572	0.93707	0.581664		4.03507	25.3141	12.0158	7.80835	37.218	2.20856		1.48752	25.3141	2.49515	1.1784	37.218	5.40067														0.46352			24.4523			0.8363
	0.105883	0.24581	0.499	0.413762	0.557837	0.378316		0.857639	0.71048	0.91383	0.719859		8.87352	15.3969	23.1686	9.34957	31.1044	3.03979		0.24581	15.3969	4.94657	0.557837	31.1044	4.79975														2.00293			9.89052			0.6068
	0.534582	0.477627	2.51156	1.02628	0.718005	0.536157		0.859465	0.688485	0.7636	0.507877		13.509	13.9875	10.2508	0.376941	0.656029	0.177386		0.477627	13.9875	3.92975	0.718005	0.656029	0.542118														0.366407			1.02601			0.7304
	0.112022	0.822632	2.5324	1.06792	0.0127126	0.597058		0.923458	0.75198	1.01758	0.735131		11.5998	6.88019	0.788426	8.50705	11.2294	38.4676		0.822632	6.88019	3.94225	0.0127126	11.2294	1.52982														0.700567			15.034			0.8363
	1.61261	1.56476	2.58932	0.505634	0.26233	0.298914		0.974669	0.894408	0.86652	0.693299		12.7413	10.3679	22.5898	0.376941	0.656029	37.0473		1.56476	10.3679	5.2833	0.26233	0.656029	1.58232														2.35601			9.59365			0.7449
	0.929828	0.125948	4.29484	0.577848	0.745959	2.00092		0.889179	0.89806	0.85075	0.69388		5.61625	21.9281	49.6025	12.4273	3.51994	28.6203		0.125948	21.9281	4.66669	0.745959	3.51994	0.514756														0.316887			40.4546			0.9422
	0.273909	0.413244	1.81212	0.423182	0.267237	0.479753		0.864777	0.79514	0.97857	0.813732		14.4911	13.4344	16.7338	2.98952	13.3792	10.4822		0.413244	13.4344	3.33	0.267237	13.3792	3.66348														0.290564			28.7361			0.9046
	0.37404	1.26885	0.180355	0.686783	0.110732	0.775391		0.82917	0.81008	1.0209	0.666324		7.86843	5.43464	7.91345	6.74808	1.58994	0.177386		1.26885	5.43464	1.94541	0.110732	1.58994	4.66209														1.28634			12.5324			0.829
	0.621498	4.41349	0.691157	0.360933	0.138261	0.259342		0.70301	0.822945	1.1122	0.666324		10.8041	50.4347	5.55207	0.376941	14.0359	0.177386		4.41349	50.4347	0.925252	0.138261	14.0359	3.56927														1.01651			25.0205			0.8827
	1.87861	1.73996	0.490624	1.62775	2.10262	0.443585		0.60175	0.82917	0.82502	0.666324		2.43642	3.18006	13.5128	0.376941	8.53122	5.61772		1.73996	3.18006	4.63921	2.10262	8.53122	3.36176														0.519369			9.86225			0.6697
	0.50416	0.407603	1.7199	0.734152	2.68362	0.41776		0.867682	0.8134	0.8466	0.704255		2.53333	19.3405	1.81414	0.376941	17.6459	0.177386		0.407603	19.3405	3.96194	2.68362	17.6459	3.30644														0.356798			3.04122			0.8141
	2.40481	1.91495	0.826114	0.266741	1.43862	0.981477		0.75115	0.8051	0.708571	0.695706		7.02591	48.3951	19.814	0.376941	26.5647	12.4422		1.91495	48.3951	3.48155	1.43862	26.5647	3.36176														1.92943			3.37002			1.018
	1.77053	0.0597584	1.97123	0.106205	0.0968823	0.745399		0.81672	0.7055	0.85158	0.670474		8.87352	20.1736	9.92296	0.376941	14.7361	7.82256		0.0597584	20.1736	5.37377	0.0968823	14.7361	2.94677														1.18252			43.0286			0.7193
	0.103205	0.732892	0.281006	0.237528	1.45243	0.884176		1.20516	0.83996	0.968361	0.748162		5.32875	4.91851	22.0314	2.98952	16.9242	2.5663		0.732892	4.91851	3.54051	1.45243	16.9242	2.58708														0.539751			0.633035			0.6459
	0.0410353	1.43897	1.05673	0.0027302	0.85772	1.36099		0.98438	0.58681	1.41681	0.675537		13.9531	0.519808	23.7671	0.376941	14.0371	2.62813		1.43897	0.519808	1.31376	0.85772	14.0371	0.27696														0.519045			2.29417			0.6482
	0.128339	2.23426	0.221505	1.4188	0.59473	1.16051		0.68558	0.81174	0.89806	0.531449		7.42939	18.9202	2.60585	25.8185	20.3217	2.62813		2.23426	18.9202	0.22902	0.59473	20.3217	0.940411														0.227848			14.935			0.808
	1.66028	1.42385	0.160847	1.26829	0.857729	0.992982		0.56689	0.62582	0.82917	0.670474		19.8126	37.6374	25.3153	22.4553	12.9945	20.1537		1.42385	37.6374	1.40198	0.857729	12.9945	0.968082														0.311712			0.549217			0.7053
	0.327748	1.49871	0.988963	0.272995	0.650081	1.17471		0.65155	0.70799	0.78103	0.798294		17.0036	21.2816	5.33216	0.744059	0.000392437	34.9038		1.49871	21.2816	0.0123559	0.650081	0.000392437	2.40673														1.47377			2.29417			0.8341
	0.464312	0.620341	0.485956	1.61527	0.511925			0.74534	0.79431	1.05908	0.690726		13.7324	5.09373	5.33216	0.744059	0.000392437			0.620341	5.09373	0.283643	0.511925	0.000392437	3.29208														0.104418			0.461915			0.8594
	0.658885	0.526698	0.523695	1.04833	0.359569			0.74534	0.74202	0.7719	0.7055		18.5531	11.1395	20.1312	9.56182	4.08697			0.526698	11.1395	0.349227	0.359569	4.08697	4.20505														0.581727			10.3084			0.7965
	0.301919	1.32364	1.15502	0.623028	0.110566			0.81672	0.8798	0.83	0.644246		14.0561	7.64483	5.33216	0.744059	3.57873			1.32364	7.64483	1.27579	0.110566	3.57873	4.53705														1.0383			16.2567			0.5914
	0.995058	0.267271	0.210486	0.899989	1.00641			0.511861	0.784599	0.93624	0.669146		10.1717	27.5527	6.93262	0.744059	33.8267			0.267271	27.5527	2.03725	1.00641	33.8267	4.33862														0.295875			20.4448			0.5868
	0.519794	0.360663	1.00907	0.69983	0.203139			0.77771	0.8798	0.91217	0.762936		5.77297	15.8697	11.9141	6.45763	5.5778			0.360663	15.8697	2.63333	0.203139	5.5778	3.95315														2.38249			28.5749			0.6042
	0.171657	0.0407246	0.463367	1.76905	1.08684			0.895487	1.21429	0.89142	0.797215		29.2715	14.2238	8.34495	1.98361	12.403			0.0407246	14.2238	3.96428	1.08684	12.403	3.24557														0.940923			4.49936			0.6217
	0.530022	1.07043	0.894697	0.803717	0.201025			0.773394	0.787421	0.94869	0.792816		20.6024	15.3108	5.33216	18.5477	11.7661			1.07043	15.3108	7.23448	0.201025	11.7661	2.6676														3.18674			4.61237			0.6272
	0.672008	1.61379	0.484303	0.361729	0.0764597			0.771983	0.71961	0.85573	0.634867		6.56613	23.3952	13.1028	12.9345	71.6949			1.61379	23.3952	6.49327	0.0764597	71.6949	2.69498														1.02242			31.6803			0.4727
	1.08224	0.565044	0.748974	0.173417	1.14323			0.868346	0.7885	1.01758	0.706745		7.90888	27.1323	10.3019	15.3988	0.134766			0.565044	27.1323	7.62419	1.14323	0.134766	2.01963														0.574706			7.45014			0.7717
	0.100157	0.605528	1.00626	0.818396	0.127461			0.736708	0.89308	0.86154	0.751565		36.3696	22.3687	0.758238	15.8404	17.9525			0.605528	22.3687	6.38829	0.127461	17.9525	1.17286														0.761726			1.29365			0.6651
	0.126016	0.409542	0.314889	2.66455	0.882649			0.691805	0.80925	1.0956	0.5395		12.0415	2.61256	19.3684	10.9922	5.87754			0.409542	2.61256	5.45643	0.882649	5.87754	1.0507														1.16226			1.40671			0.5972
	0.913234	0.234909	0.773546	0.152685	1.55172			0.68475	0.85075	0.7055	0.716373		10.1109	8.40536	5.33216	3.87029	27.6866			0.234909	8.40536	5.33831	1.55172	27.6866	1.1057														0.615684			1.43687			0.8576
	0.488966	0.318521	0.606832	0.0510683	0.721725			0.851497	0.84162	1.05161	0.710397		4.5655	5.44174	1.38697	4.28312	25.6354			0.318521	5.44174	5.27688	0.721725	25.6354	1.10769														0.901016			9.13482			0.8617
	0.144114	1.12466	2.17949	0.111177	1.36466			0.721685	1.09145	0.844608	0.656198		5.46136	8.40536	8.23828	10.2082	14.602			1.12466	8.40536	4.3288	1.36466	14.602	3.9005														0.443411			1.24591			0.6512
	0.62787	1.7987	3.26608	0.213859	0.673141			1.08066	0.99766	0.86403	0.840292		18.0669	9.09804	17.4831	9.85185	12.403			1.7987	9.09804	3.24307	0.673141	12.403	3.97131														0.660083			15.7349			0.8523
	1.52193	1.18917	0.0827384	2.37516	0.84886			0.87565	1.2201	0.5561	0.7055		29.4956	27.1323	8.02077	16.5197	7.63075			1.18917	27.1323	4.55642	0.84886	7.63075	2.22785														1.0102			32.589			0.887
	0.771505	1.0055	1.32716	1.1929	0.12941			0.960144	0.94454	0.7055	0.732475		15.8963	12.6733	27.5169	12.4678	9.65331			1.0055	12.6733	2.95957	0.12941	9.65331	4.64528														1.13678			17.9733			0.8304
	1.85663	3.40437	0.503417	0.339107	1.35607			0.968693	0.52207	0.80593	0.60424		23.9957	5.14333	0.951859	7.21743	7.78563			3.40437	5.14333	1.69676	1.35607	7.78563	3.92311														0.863822			20.8239			0.8581
	1.33015	1.28201	0.077503	0.472653	0.423782			1.48778	0.60756	0.86652	0.544978		15.6929	33.5911	22.7533	6.66381	19.0991			1.28201	33.5911	2.27753	0.423782	19.0991	3.48425														0.148318			7.856			0.7193
	0.815751	0.741513	1.68303	0.606944	0.280331			1.22093	0.89225	1.17528	0.696619		16.4375	10.7427	11.8374	3.29902	21.0595			0.741513	10.7427	2.37593	0.280331	21.0595	3.0669														0.365853			0.716506			0.7687
	1.51517	0.67187	1.32888	0.732014	1.03203			0.87731	0.81672	1.1454	0.636361		9.71621	18.7228	27.5169	8.4542	27.7063			0.67187	18.7228	1.02642	1.03203	27.7063	1.53577														0.0758838			9.87157			0.724
	3.31317	1.12343	5.0571	0.104915	0.317197			0.8549	0.98521	0.622832	0.618682		34.3284	19.6576	63.1933	8.11307	18.244			1.12343	19.6576	0.0125998	0.317197	18.244	1.67652														0.698813			2.95721			0.7304
	0.341363	2.52512	2.47142	0.205433	2.22107			0.88063	1.26409	0.603161	0.60424		27.6585	11.3214	14.3444	15.791	6.14921			2.52512	11.3214	0.935074	2.22107	6.14921	0.134667														0.407134			9.05308			0.6782
	2.20451	1.41966	0.11073	0.792012	1.60002			1.12714	0.72625	0.692552	0.747498		26.8168	21.2342	24.5115	40.149	2.19496			1.41966	21.2342	1.14503	1.60002	2.19496	0.786351														1.52301			24.7919			0.6387
	1.19163	0.0913226	0.584332	0.0160518	0.777429			0.92877	0.99932	0.960144	0.630883		39.2419	6.27786	50.8909	12.1351	10.4958			0.0913226	6.27786	1.53351	0.777429	10.4958	3.00936														0.419436			8.01772			0.7611
	0.429618	0.152132	3.11914	0.140538	0.48534			1.1122	0.918893	0.757292	0.609303		11.1301	78.1228	44.0482	9.14843	12.9953			0.152132	78.1228	0.416486	0.48534	12.9953	2.53308														0.160808			9.59873			0.6966
	1.46952	1.57621	3.46689	1.30116	1.27875			1.15785	0.716373	1.01418	0.721436		1.72978	64.4159	3.3378	25.8765	38.4688			1.57621	64.4159	0.365402	1.27875	38.4688	2.43521														0.344589			18.8442			0.5249
	0.851393	4.03014	0.2953	0.887251	0.0473789			0.8134	0.774722	0.944955	0.732475		28.01	57.8253	14.9881	16.4945	8.72175			4.03014	57.8253	1.92527	0.0473789	8.72175	4.56836														0.233283			23.6078			0.7751
	0.436397	1.57457	0.3419	0.0401687	0.451656			0.79265	0.92794	1.01061	0.759699		14.8695	17.8677	24.2493	3.58587	10.1139			1.57457	17.8677	2.62725	0.451656	10.1139	4.87795														1.78594			21.3922			0.6938
	0.0652727	1.91825	1.69401	1.24509	0.673104			0.8549	0.720274	0.852327	0.696619		6.79762	70.0112	35.9181	19.1236	0.159155			1.91825	70.0112	3.2982	0.673104	0.159155	4.27904														0.44893			2.31706			0.724
	0.851972	0.399681	2.05122	0.171083	0.786595			0.88644	0.897811	0.666324	0.591458		22.4944	46.7234	30.8076	18.2136	37.2462			0.399681	46.7234	3.92293	0.786595	37.2462	0.772589														0.745202			6.41826			0.7515
	1.08541	0.479993	0.3724	0.282184	1.18447			0.67977	0.7553	0.669146	0.751565		39.8535	28.7905	44.0482	6.26546	20.3969			0.479993	28.7905	4.74426	1.18447	20.3969	0.533561														0.911346			19.8156			0.6938
	1.56885	0.0309115	0.210028	0.346471	1.28425			0.85407	0.826846	0.722681	0.664		17.5222	2.61256	28.1028	8.60277	3.52562			0.0309115	2.61256	5.49574	1.28425	3.52562	0.727169														0.345953			0.136409			0.5285
	0.372746	0.477336	0.602492	1.05314	0.241275			0.72874	0.762936	0.695706	0.709152		13.0215	8.16191	15.7474	20.8427	10.6251			0.477336	8.16191	6.55908	0.241275	10.6251	2.69553														1.14567			49.2233			0.7382
	0.0929672	0.454533	1.90536	0.678461	0.238566			0.83664	0.738866	0.761027	0.719361		7.04308	11.8772	13.4807	0.859557	3.02068			0.454533	11.8772	6.76636	0.238566	3.02068	3.62795														0.707112			4.22332			0.7262
	1.24334	1.4667	1.50647	0.908323	0.298453			0.8715	0.736874	0.855564	0.554025		28.9257	41.4817	20.3919	20.8427	18.2758			1.4667	41.4817	5.89655	0.298453	18.2758	4.5217														0.483314			16.5183			0.7869
	1.79077	0.150447	0.291195	0.339109	0.596848			0.67313	0.708239	0.84079	0.666324		36.4653	5.66039	21.2541	14.2521	7.97095			0.150447	5.66039	7.35282	0.596848	7.97095	5.61896														0.446262			2.19331			0.9279
	1.6245	0.25546	0.434979	2.08845	0.0497207			0.9545	0.594197	0.6972	0.744925		10.2102	3.75524	17.522	15.791	15.1638			0.25546	3.75524	6.18007	0.0497207	15.1638	5.03119														0.0631377			14.2116			0.8027
	0.722672	0.816293	0.187117	0.537775	0.113666			0.83332	0.645574	0.985791	0.581664		31.8496	11.7759	0.00354773	15.791	37.7969			0.816293	11.7759	6.47731	0.113666	37.7969	4.61515														0.283705			0.0151568			0.6308
	2.10496	1.68627	1.34844	0.177594	0.408597			0.88312	0.741522	0.639183	0.609303		17.6342	3.66723	32.9088	0.859557	7.2343			1.68627	3.66723	4.11252	0.408597	7.2343	4.05818														0.44644			0.0314795			0.8581
	1.41702	1.84998	0.912823	0.535477	0.371927			0.88312	0.651218	1.08713	0.567637		14.8572	7.9977	37.8785	10.6445	2.65244			1.84998	7.9977	2.5807	0.371927	2.65244	3.29018														1.44111			18.2732			0.6916
	0.108854	0.326647	0.353508	0.556483	0.976666			0.98355	0.794476	1.09834	0.696619		17.1071	1.13793	25.4669	17.6433	8.49045			0.326647	1.13793	2.08511	0.976666	8.49045	3.26095														0.839792			16.1288			0.9032
	0.28468	0.517402	0.415626	0.542652	1.67537			1.04082	0.612706	0.759699	0.560167		15.7171	8.84022	26.5686	4.63005	12.1685			0.517402	8.84022	0.504614	1.67537	12.1685	2.17753														1.16693			20.1487			0.9679
	1.51105	0.951124	0.622386	0.18739	0.453489			0.92628	0.68724	0.743846	0.678276		18.978	20.3368	7.12147	10.4384	14.5711			0.951124	20.3368	0.708216	0.453489	14.5711	2.55872														2.03586			8.21075			0.6434
	0.121844	0.686825	0.0410696	0.625015	1.15584			0.84245	0.639183	0.946366	0.809914		18.978	10.8001	40.361	19.4042	2.81949			0.686825	10.8001	1.3034	1.15584	2.81949	0.72206														0.0838422			3.11404			0.6124
	0.0296926	0.612455	0.433376	0.000174349	0.83416			0.94537	0.77107		0.787421		0.543072	26.1814	22.7518	20.3512	0.360346			0.612455	26.1814	2.58842	0.83416	0.360346	0.398288														0.302549			2.42567			0.7214
	0.143075	0.580574	0.651642	0.993492	0.954612			0.9379	0.818795		0.675454		29.9008	6.22827	3.6403	1.45022	8.17042			0.580574	6.22827	3.0235	0.954612	8.17042	0.275226														0.842206			15.239			0.6697
	1.27424	0.389996	0.49336	0.481124	1.60594			0.80925	0.7553		0.700437		9.63335	1.46463	11.3284	43.5498	12.6343			0.389996	1.46463	4.45166	1.60594	12.6343	1.55765														1.35864			54.1342			0.9781
	0.101183	0.233951	1.10476	0.587027	2.43253			0.70467	0.645325		0.591458		27.1081	1.46463	5.89269	18.7746	3.45373			0.233951	1.46463	5.21486	2.43253	3.45373	1.01295														0.375808			28.2703			0.7214
	1.6198	0.486708	0.619985	2.18085	0.233857			0.89474	0.7553		0.705334		12.8494	7.90892	21.0036	6.02414	2.65244			0.486708	7.90892	6.3433	0.233857	2.65244	1.15128														0.426715			18.7648			0.6982
	1.40896	0.269299	1.35369	1.98497	0.115754			0.8715	0.76526		0.792235		7.05157	7.19276	17.9832	1.56257	7.07019			0.269299	7.19276	5.17498	0.115754	7.07019	2.16879														0.271272			3.00571			0.941
	1.10619	1.40809	0.354808	0.286031	0.539489			0.68973	0.644578		0.755134		13.4932	8.13535	34.9478	15.4865	22.7405			1.40809	8.13535	2.98479	0.539489	22.7405	3.5564														0.57949			11.5323			0.7596
	1.86004	0.0706647	1.88896	0.124548	0.712142			0.777793	0.981309		0.696619		44.4569	1.5534	52.317	3.93977	12.249			0.0706647	1.5534	1.63696	0.712142	12.249	4.61359														0.211705			5.67681			0.7631
	0.948847	0.131064	0.996047	0.292333	0.19301			0.82585			0.771734		2.31933	1.309	20.2471	5.6748	15.8999			0.131064	1.309	0.0369847	0.19301	15.8999	4.5546														0.0131406			33.1493			0.8174
	0.0645038	0.405777	0.692545	0.389572	0.185008			0.98106			0.69388		39.6933	5.87801	41.5383	11.5444	6.11033			0.405777	5.87801	3.68483	0.185008	6.11033	2.95297														0.231568			2.41077			0.7449
	0.247814	0.431512	1.07748	0.281536	0.128973			0.90968					24.8031	8.39618	30.1937	15.8693	8.02516			0.431512	8.39618	5.75794	0.128973	8.02516	2.35595														0.228363			2.40275			1.0173
	1.20344	0.643928	0.0475285	0.236537	0.13492			0.86154					2.46972	6.31705	13.0472	3.20756	0.399733			0.643928	6.31705	3.60756	0.13492	0.399733	1.22156														0.282057			0.293241			0.9824
	1.58263	0.985228	0.872996	0.143831	0.715424			0.7553					21.2583	18.2527	0.447504	7.47017	10.4887			0.985228	18.2527	1.3235	0.715424	10.4887	1.14833														0.550203			0.953504			1.0021
	0.273971	0.238151	0.690959	0.525907	1.33057			1.03293					15.8465	39.0479	18.1887	30.8107	12.6679			0.238151	39.0479	3.6271	1.33057	12.6679	0.0926483														0.407821			2.81018			0.8576
	1.17592	0.650186	0.119578	0.231787	1.13873			1.47325					9.94841	33.9843	4.26348	36.599	29.6513			0.650186	33.9843	3.51214	1.13873	29.6513	0.356854														1.38227			1.05878			0.8318
	0.693859	2.93332	0.649569	0.0667073	0.0990785			0.83166					8.67318	55.1691	27.0157	14.3984	11.4063			2.93332	55.1691	1.2084	0.0990785	11.4063	0.0459193														0.320847			2.48817			0.887
	0.295409	0.545675	0.973142	0.0519156	0.816836			1.03335					27.3542	4.489	2.29869	10.4392	1.64984			0.545675	4.489	8.4722	0.816836	1.64984	0.362701														0.128436			0.811969			1.0329
	0.738416	0.50079	3.81504	1.31477	0.831524			0.996					11.9857	14.8011	40.4992	13.6911	40.5012			0.50079	14.8011	6.65787	0.831524	40.5012	0.487101														0.564094			17.2711			0.9279
	0.695925	1.0636	2.48061	0.462325	0.0349365			1.7181					10.0054	7.39967	27.6573	13.5857	3.68763			1.0636	7.39967	5.64006	0.0349365	3.68763	1.21248														0.251341			19.3427			0.8026
	1.51872	0.663816	2.11088	0.435034	2.84564			0.94371					17.8919	21.843	33.9652	2.83468	0.399733			0.663816	21.843	2.40367	2.84564	0.399733	1.66272														0.695145			17.4772			0.8647
	1.46777	0.210442	0.685634	0.433326	1.8346			1.10722					8.20309	27.2705	29.3297	12.1837	18.0335			0.210442	27.2705	1.51537	1.8346	18.0335	1.0314														0.894843			0.221433			0.8056
	0.155279	0.63847	1.23655	0.232713	0.80236			0.86154					6.30214	50.519	22.7834	14.4873	30.3804			0.63847	50.519	0.928372	0.80236	30.3804	2.2554														0.708654			5.64106			0.8042
	0.139486	0.407704	3.0434	0.35121	0.288985			0.594031					5.01481	22.0761	34.5769	1.93492	11.7097			0.407704	22.0761	5.50423	0.288985	11.7097	4.45138														1.00454			0.421797			0.913
	0.331123	4.2081	0.92741	0.495431	0.147002			1.10224					1.82797	10.8292	33.2749	12.7895	0.399733			4.2081	10.8292	2.47925	0.147002	0.399733	4.97604														0.38864			26.1938
	0.576246	1.12823	0.192158	0.612903	0.530282			1.10639					0.774594	17.3124	6.29466	6.98039	16.1523			1.12823	17.3124	2.22151	0.530282	16.1523	3.5815														0.263156			5.96738
	0.124703	1.09319	4.05562	0.431098	1.25291			0.89225					3.61237	4.489	3.78164	3.81749	13.1888			1.09319	4.489	0.184509	1.25291	13.1888	2.97929														0.379419			0.0810737
	0.0849893	0.983033	3.03619	1.51591	0.148316			0.920968					2.74595	26.4748	18.0653	17.5538	4.2785			0.983033	26.4748	3.46142	0.148316	4.2785	3.15924														0.470546			1.6722
	0.0150489	1.24387	4.05486	0.288759	0.693871			0.709152					11.5645	6.97855	6.29466	5.64545	3.33155			1.24387	6.97855	7.93625	0.693871	3.33155	1.97582														1.22001			3.20677
	0.352396	0.922122	2.01164	0.218997	0.837001			1.04862					12.6123	2.2864	2.59761	10.3333	11.7369			0.922122	2.2864	6.7543	0.837001	11.7369	2.18014														1.65614			13.6621
	0.527707	0.915971	1.764	1.12301	0.850484			1.04431					1.03444	19.2605	3.82122	17.0746	26.3265			0.915971	19.2605	5.8806	0.850484	26.3265	2.47107														1.0453			0.488128
	1.17482	1.63991	0.273953	1.06106	0.156614			0.919142					7.26231	34.7454	34.8024	38.6428	6.87243			1.63991	34.7454	4.76226	0.156614	6.87243	1.24202														1.49526			13.2038
	0.31943	1.39532	2.2862	0.0961399	0.427316			1.06655					1.03444	4.489	13.6211	16.903	8.14194			1.39532	4.489	0.494304	0.427316	8.14194	1.13208														1.10147			5.13488
	0.534546	0.492123	2.38273	1.14652	0.165948			0.882788					4.18104	4.489	8.55745	21.9291	11.8084			0.492123	4.489	1.98055	0.165948	11.8084	0.0451172														1.29981			0.221433
	1.77384	1.65698	1.44419	0.451171	0.176838			0.86901					13.1379	24.8668	2.95128	22.2524	1.58069			1.65698	24.8668	9.05287	0.176838	1.58069	2.13295														0.279527			8.8393
	0.165741	1.49597	1.47832	0.334691	0.31219			0.846683					6.599	24.8668	7.5402	21.0071	3.14183			1.49597	24.8668	8.88203	0.31219	3.14183	2.49804														0.511527			0.454001
	0.0607198	1.87327	1.67785	2.04039	0.0554889			0.989941					18.1551	13.5856	2.76465	18.886	27.9972			1.87327	13.5856	5.82066	0.0554889	27.9972	3.63323														0.399205			23.0385
	0.512864	2.34404	1.04529	0.48118	0.142093			0.918644					0.777725	5.06401	18.8501	0.187241	14.6726			2.34404	5.06401	4.89333	0.142093	14.6726	4.32036														0.231638			44.6288
	0.543769	0.593698	1.65364	0.591711	0.0368197			0.840043					4.588	22.9435	28.4877	0.187241	26.7783			0.593698	22.9435	5.69994	0.0368197	26.7783	5.21025														0.254181			0.93772
	0.0218923	1.76096	0.129428	0.131077	0.148316			0.717369					0.777725	12.3417	12.8906	2.7898	6.87243			1.76096	12.3417	5.54073	0.148316	6.87243	5.97361														0.20558			1.73573
	0.325586	0.406253	0.532318	0.175086	0.0643724			0.753723					27.8306	17.7448	29.4336	20.3688	0.586148			0.406253	17.7448	3.61848	0.0643724	0.586148	3.9634														0.384827			6.96569
	0.12693	1.15205	0.0908851	0.13718	0.441482			0.793812					27.3428	1.69577	26.5003	3.3891	3.61316			1.15205	1.69577	2.96344	0.441482	3.61316	3.56561														1.43734			1.41036
	0.586468	0.122954	0.543145	0.195225	0.0374985			1.02497					1.82608	1.48089	28.9229	11.9075	14.1044			0.122954	1.48089	1.85905	0.0374985	14.1044	2.34459														0.0399909			14.1552
	0.664161	3.70786	0.563887	0.306976	0.47505			0.772232					17.6572	29.7327	42.0068	3.76358	13.5119			3.70786	29.7327	0.461376	0.47505	13.5119	2.42296														0.719562			1.46812
	0.554172	0.765103	0.399137	0.729569	0.183478			0.964626					4.1946	8.03439	38.3268	3.36707	1.21625			0.765103	8.03439	4.49842	0.183478	1.21625	1.50206														0.187962			0.460294
	0.963014	1.40182	0.785428	1.24276	1.17463			0.882788					0.777725	32.6583	13.5979	9.15987	8.22596			1.40182	32.6583	4.76637	1.17463	8.22596	0.230872														0.295286			1.524
	1.22461	0.82487	0.324057	0.520849	0.63903			0.898973					0.777725	4.87243	3.6352	7.95241	2.49061			0.82487	4.87243	2.47963	0.63903	2.49061	0.664591														0.994622			17.6242
	1.84697	0.096231	0.333597	0.710921	0.203617			0.728906					11.3971	20.1049	18.5082	19.2528	32.5231			0.096231	20.1049	0.0664271	0.203617	32.5231	3.12195														0.690166			0.237125
	0.401331	0.342015	0.278406	0.367463	1.5768			0.817467					0.777725	20.1034	21.7865	3.17922	3.69914			0.342015	20.1034	0.75666	1.5768	3.69914	4.25494														0.825586			36.135
	0.285139	1.08103	0.331102	0.666573	0.245059								22.4216	0.0595822	7.28133	17.3383	10.245			1.08103	0.0595822	3.0132	0.245059	10.245	5.31748														0.122508			8.14772
	1.32026	0.852187	1.10493	1.76883									16.5791	42.5627	40.278	17.1668				0.852187	42.5627	2.96714																	0.0265271			0.460294
	1.21769	0.359651		0.172577									3.5054	4.44746		20.0376				0.359651	4.44746	6.05349																	0.812045			15.4491
	0.182507	0.376432		0.383737									0.777725	14.215		3.5537				0.376432	14.215	6.79197																	2.14562			12.147
	0.390734	0.342935		1.21285									10.4466	22.4627		28.8674				0.342935	22.4627	4.93138																	1.06265			0.26637
	0.335476	1.1578		0.5456									26.2543	13.6363		6.15295				1.1578	13.6363	0.208819																	0.385891			8.23516
	0.0411694	0.0825429		3.6631									11.5743	21.6361		14.6575				0.0825429	21.6361	0.416343																	1.1167			52.2152
	0.564558	0.572034		0.638018									1.81819	5.33915		13.669				0.572034	5.33915	2.70655																	0.402486			26.9457
	1.88992	0.97652		0.877855									18.7457	2.32636		5.53732				0.97652	2.32636	2.99668																	0.206908			26.9508
	0.330175	0.611944		0.656258									39.2236	27.7422		6.16692				0.611944	27.7422	2.20157																	2.69743			27.7047
	0.0826251	0.721958		0.362935									1.81819	35.079		18.2617				0.721958	35.079	0.983906																	1.00679			26.3202
	0.345003	0.432216		0.195241									9.58336	20.6057		10.611				0.432216	20.6057	2.7337																	0.957004			26.3202
	0.517523	0.435132		0.0740679									0.784373	2.07234		7.95683				0.435132	2.07234	4.70669																	0.241346			10.8786
	1.69109	0.714119		0.380422									1.81819	13.2804		2.89959				0.714119	13.2804	5.50718																	1.14178			18.3012
	1.32502			1.40671									0.908122			3.6408																							0.139664			2.35454
	1.5051			0.619841									1.81819			3.53974																							0.899294			28.6047
	2.54896			0.995284									10.7908			0.173273																							0.274777			6.61334
	1.10641			1.45266									1.81819			22.6604																							3.46352			0.0245018
	1.67528			1.09895									27.0193			22.4466																							1.06967			30.1096
	0.252474			2.11344									4.30774			9.69254																							0.18282			4.7653
	0.249848			0.338127									1.81819			14.5703																							1.05067			14.028
	0.0816285			0.448047									4.42075			17.6988																							0.277431			5.73446
	0.0898645			0.032589									6.05459			9.28905																							0.110394			0.00054096
	0.462859			0.172776									12.123			4.59037																							0.719643			29.74
	1.63842			1.0477									3.15155			21.0277																							0.387773			0.00436025
	0.999226			0.242112									24.105			20.6785																							1.18922			0.00996327
	0.012609			1.17017									17.6057			21.6276																							1.32752			4.77025
	1.26808			0.143355									4.8516			4.72065																							0.111388			0.00190536
	0.663125			0.0854524									6.10084			1.91228																							1.49389			0.00960551
	0.151672			0.412287									4.80418			1.91228																							0.359492			0.0120471
	0.353816			0.194842									15.3538			4.12573																							0.497721			0.009605
	1.19206			0.552024									8.9594			7.17249																							1.02297			28.2922
	0.662989			1.06285									19.3414			7.30333																							1.4665			7.58854
	2.64384			0.839079									12.5893			12.2735																							0.359245			16.3927
	3.69434			0.727796									10.783			12.2722																							0.581102			0.00875728
	1.17841			0.370398									16.8518			40.7796																							0.71961			6e-05
	1.20711			0.0593653									24.4398			26.7434																							2.65527			34.5048
	1.24801			1.21477									51.2186			36.334																							0.637092			19.4448
	0.312638			0.0293168									18.5336			1.72894																							0.302748			2.62826
	0.629362			1.46915									10.7722			1.41124																							0.230891			21.4169
	1.33271			1.14869									16.6192			27.6491																							1.2103			0.439097
	0.13613			0.310602									6.21861			2.4216																							0.440614			2.98193
	0.848913			0.424168									12.0882			17.7034																							0.53712			20.866
	0.694683												2.10638																										0.00445628			64.2693
	1.17432												24.5569																										0.400229			7.74558
	0.56847												4.84166																										1.49745			2.21803
	0.403303												1.56936																										0.0680975			15.5609
	0.148525												1.56936																										0.354834			3.95641
	1.23413												21.9481																										0.534753			5.95566
	0.869848												1.56936																										0.375302			4.58521
	0.996033												2.93192																										0.549793			24.9617
	0.0586942												9.21626																										0.379758			2.47788
	0.214053												1.56936																										1.23704			0.317123
	3.31287												9.14256																										0.21167			21.3906
	0.680624												7.58968																										0.849202			0.45615
	0.0479253												16.1018																										0.0668441			7.74558
	0.339263												1.56936																										0.454955			0.317123
	0.456504												17.2775																										0.153599			17.5678
	1.80678												17.0964																										0.988736			10.6894
	0.257999												1.56936																										0.173377			5.35427
	1.86545												9.69946																										0.383992			10.7519
	1.43266												1.90061																										0.400028			0.685524
	0.396252												9.16212																										0.641603			29.6127
	0.130893												1.56936																										0.129475			0.610145
																																							0.106103			2.62177
																																							0.759899			5.75249
																																							0.489151			40.3636
																																							0.759895			0.510312
																																							1.11977			0.67265
																																							0.115332			58.5527
																																							0.568375			2.45473
																																							0.138709			1.64454
																																							0.078015			0.508236
																																							0.0454013			0.486439
																																							1.04958			16.5035
																																							0.0282267			3.42046
																																							1.065			33.4633
																																							0.209848			13.3623
																																							0.267196			12.4455
																																							0.385608			16.1261
																																							0.1533			4.94439
																																							0.806888			14.2555
																																							0.106891			15.7049
																																							0.35829			4.57895
																																							0.614705			0.280388
																																							0.650577			0.223185
																																							1.26967			0.0958606
																																							0.180071			0.235311
																																							0.483594			0.295335
																																							0.534588			28.7912
																																							0.0181316			19.4708
																																							0.0441848			0.230566
																																							0.80093			0.0852503
																																							0.051647			0.24815
																																							1.14831			0.126176
																																							0.0650015			8.69076
																																							0.544996			11.1292
																																							0.346443			2.67463
																																							2.91075			33.086
																																							0.690701			0.037504
																																							0.0443131			0.257138
																																							1.08024			16.1261
																																							0.0418271			5.15049
																																							1.07029			4.789
																																							0.0913977			0.0766638
																																							1.10636			1.94035

## Sheet: Suppl. Figure 3
Suppl. Figure 3A		Untreated	PRC1 siRNA	Suppl. Figure 3B	no lagging	lagging	Suppl. Figure 3C	no lagging	lagging	Suppl. Figure 3E	Untreated		PRC1 siRNA		Suppl. Figure 3F	Untreated	PRC1 siRNA	Suppl. Figure 3G	opto	ctrl	Suppl. Figure 3H	Untreated		Untreated		Untreated		Untreated		Untreated		Untreated		Untreated		Untreated		Untreated		Untreated		Untreated		Untreated		Untreated		Untreated
	Lagging	2	8	n (measurement)	192	155	n (measurement)	245	226		Time (s)	Number of spots	Time (s)	Number of spots	n (measurement)	16	14	n (measurement)	51	37		x pole coord	y pole coord	x pole coord	y pole coord	x pole coord	y pole coord	x pole coord	y pole coord	x pole coord	y pole coord	x pole coord	y pole coord	x pole coord	y pole coord	x pole coord	y pole coord	x pole coord	y pole coord	x pole coord	y pole coord	x pole coord	y pole coord	x pole coord	y pole coord	x pole coord	y pole coord	x pole coord	y pole coord
	No lagging	35	12		dKC (µm)	dKC (µm)		dEQ (µm)	dEQ (µm)		250.5	9	160.5	5		EB3 comet (µm/min)	EB3 comet (µm/min)		Half-overlap length (µm)	Half-overlap length (µm)		16	17	16	17	9.333	5.667	22	15	16	13.667	52.333	16	14	11.333	39	8.667	28.333	18	29	22	17.667	24.667	21.333	23.667	12.667	18	30	16.333
	All	37	20		1.108	1.4899		0.991675	0.0864236		232.5	6	234	9		20.5433	18.3279		1.645	0.0715		17	145	17	145	10.333	144	17	143	12	138.333	48.667	142	11.333	138.667	55	172.333	17	151.333	25.333	159	22.667	160.333	17	150	17.667	147.667	40	142.333
					1.1556	1.2547		0.272962	0.461291		285	9	312	7		18.6853	9.3498		3.999	0.7505		x EB coord	y EB coord	x EB coord	y EB coord	x EB coord	y EB coord	x EB coord	y EB coord	x EB coord	y EB coord	x EB coord	y EB coord	x EB coord	y EB coord	x EB coord	y EB coord	x EB coord	y EB coord	x EB coord	y EB coord	x EB coord	y EB coord	x EB coord	y EB coord	x EB coord	y EB coord	x EB coord	y EB coord
					0.7214	1.1066		1.62267	0.864921		144	3	192	5		12.3226	16.7954		1.537	0.6035		21.25	97.75	22	60.75	22.75	95.5	28.25	59	31.5	61.75	22.667	104.333	37.5	94.5	16.333	77	14.75	55.5	15	93	24.25	104	35.333	102	50.667	85.333	27.25	85.5
					0.6142	0.9975		0.590314	0.821915		153	6	147	4		13.3215	15.4967		2.445	0.6714		14.75	88.25	20.75	65	24.5	91.5	30.75	63.25	34	66.25	20.667	99.333	38	91	16.333	81.333	13.5	62.75	19.25	88	24	99.25	36.333	95.667	51	81.667	26.5	78.75
					0.913	1.1463		0.694994	0.512789		144	6	126	3		14.3071	16.7099		2.691	1.6875		14.75	85.25	19.25	69	26.25	88.75	30.5	66.5	37	70.5	18.667	93	37	85.75	17.333	85	13.5	66.75	21.5	84	23.75	94.75	36.333	93	49.333	76.667	25.25	76.75
					0.9964	0.9234		0.194121	0.478138		177	5	100.3	3		17.7271	19.3388		1.8002	1.4125		16.5	79.75	18.25	72.25	27.25	83.75	32	71.75	38.75	70.5	17	88.667	36.5	79.75	17	91.333	13.75	70	23.25	76.75	24.25	90.5	36.667	90.667	47.667	71.667	24.75	74.5
					0.893	1.2351		1.5857	0.145181		336	7	100.5	1		17.5071	15.3778		1.6202	1.7125		17.75	76.75	18.25	76.25	27.5	81	33.25	76	38.5	72.5	16	85	36.75	73.75	16	96	14.25	74.25	25	74.25	23.75	84	35.333	87.667	47.333	70.333	24.5	68
					1.1122	1.015		0.952189	0.895738		193.5	7	172.5	3		15.6366	12.9828		0.6965	1.421		18.5	71.75	19.25	80	27.5	77.25	35	80.25	39	76.25	16.333	80.667	37	69.5	17	99.667	14.5	77.5	26.5	71.25	23.25	81.25	35.333	85.667	46.667	63.333	23.75	65
					0.9325	0.8464		0.615623	0.442527		339	12	141	4		16.4906	16.0988		0.4032	1.157		19.25	67	18.75	85.25	27.75	72.25	34	82.25	38.25	80.25	15	76.333	36.75	64.5	17.667	103.667	14.25	82.5			23.75	75.75	33.667	82.667	46	58	22.25	58.5
					0.8944	1.1069		1.97487	0.984353		249	5	126	3		19.6824	12.4453		0.5532	0.925				18.75	88	27.25	71.75	33.5	84.5	38.25	84.25	14.667	73.667	36.5	61.25	17.667	107.333	13.75	85.25			23.25	72.75	32.667	80.333	45.667	56.667	21.75	54.75
					0.8737	1.2285		0.483382	0.281048		85.5	4	183	4		18.7604	13.1172		1.6875	2.325				19	98	28.5	65.25	33.5	86	38.25	86.25	13.667	69.667	36	55.75	18.667	110.667	11.75	90.75			23	66.5	32.333	77.333	45.333	54.667	22	54.75
					0.6561	1.2738		3.02882	1.04366		186	7	112.5	3		12.9085	10.7793		2.3375	1.175						29.75	64.75	34.25	88.75	39.25	93.5	12.667	65.333	36	52.5	19.667	113.667	10.25	93.25					30.667	73.333			22.25	53.5
					1.1754	0.8464		1.3085	0.921624		159	3				15.5632	15		3.075	0.525						30.25	63.75	35.5	91.75	38.75	97.5	11	60.333	36.25	50.75	21.333	118.333	11	94.5
					0.7689	0.9471		1.69793	0.262695		118.5	4				14.3947	13.3896		3.9875	0.9582						30	61.25	36.25	94.75	38.25	101.75	11	57			23	120	11.75	100.75
					1.0065	0.7791		1.26981	0.245027		178.5	7				13.6014			0.0545	1.0415						30	59.25			37.5	104.25					23.667	123.333
					0.9279	0.896		1.29001	0.610915		249	8				14.2313			1.5205	1.1915
					0.6959	1.0945		0.0126413	0.88314		112.5	4							0.095	0.9415		PRC1 siRNA		PRC1 siRNA		PRC1 siRNA		PRC1 siRNA		PRC1 siRNA		PRC1 siRNA		PRC1 siRNA		PRC1 siRNA		PRC1 siRNA		PRC1 siRNA		PRC1 siRNA		PRC1 siRNA		PRC1 siRNA		PRC1 siRNA
					0.9787	0.973		0.0245391	0.39166		168	4							3.024	1.6585		x pole coord	y pole coord	x pole coord	y pole coord	x pole coord	y pole coord	x pole coord	y pole coord	x pole coord	y pole coord	x pole coord	y pole coord	x pole coord	y pole coord	x pole coord	y pole coord	x pole coord	y pole coord	x pole coord	y pole coord	x pole coord	y pole coord	x pole coord	y pole coord	x pole coord	y pole coord	x pole coord	y pole coord
					0.9779	1.1672		0.538818	0.639524		144	6							2.54	0.7045		42.667	26.667	18	17	37	26.667	18	21.667	61	12	16	21.5	47.333	19	18	20.667	25.5	21.5	30.333	20.333	30.333	19.333	28	19.5	25	13	18.667	16.667
					1.037	0.9964		0.0728736	0.280096		234	8							2.89	0.3375		41.333	133.667	10.5	119.5	34	132.667	16.667	129	60	166	40.5	167.5	63.333	168	39.333	163.333	16	174.5	17.667	171.333	23	172.667	11.5	171	26.333	171	19.667	167.333
					0.8793	0.8323		0.890396	0.115811		174	6							3.028	0.05		x EB coord	y EB coord	x EB coord	y EB coord	x EB coord	y EB coord	x EB coord	y EB coord	x EB coord	y EB coord	x EB coord	y EB coord	x EB coord	y EB coord	x EB coord	y EB coord	x EB coord	y EB coord	x EB coord	y EB coord	x EB coord	y EB coord	x EB coord	y EB coord	x EB coord	y EB coord	x EB coord	y EB coord
					1.6933	1.0643		0.945572	0.633777		114	3							2.003	0.375		27	63.333	38	84.75	21	66.5	61.5	53	18.667	63	56.667	70.333	18.333	81.333	35.5	64.75	51.333	72.333	70.333	87.333	79	77.75	48.333	106.333	19.5	71.5	41.25	78.25
					1.2484	0.8922		0.353809	1.34801		102	3							0.878	1.2667		26	67.333	37.5	83	20.75	69.5	63.5	56	19	68.333	58.667	78	18	83.667	36.25	67	48	78	71	89.667	81.75	80.5	47.667	102.333	19.5	76	41.5	82.25
					0.8793	0.829		0.135188	0.467119		73.5	2							2.475	0.7		24.667	71.333	37.5	79.75	19	72.75	63.75	59.5	19	72	60	82.667	16.333	86.333	37.25	70	47	79.667	71	91	83.25	84.25	49.333	98.333	19.25	78.75	42.25	84.25
					1.1335	0.9197		0.31291	0.349808										0.375	0.533		23	76.333	38	75.75	18.5	77.25	64	63	18	78.333	61.667	89.333	16	89.333	36.25	73.75	47	81	70.667	97.667	83.75	86.75	49.667	93.667	19.25	84	41.75	86.25
					0.911	0.8909		0.475761	0.677253										2.4	1.933		21	80.667	37	72.5	16.75	79.5	64	67	18	80	62	93.667	16.333	93.667	36.5	77	46.333	85.333	69.667	99	85	90.25	50.667	90.333	19.75	90.25	42.75	90
					1.1575	0.8857		0.80161	0.740094										3.5	0.684		17	86.333	36.75	71.5	15.25	84.25	65	70	17.667	86.333	63	96.667	15.667	98.667	37.5	79.5	43.667	89.333	69	103.667	83.75	97.25	50.667	90.333	20.75	93.25	43	91.5
					1.2176	1.2511		0.170584	0.621409										0.15	0.717		14.667	91	36.75	68.5	12	86.75	66.25	74	16.667	89.667	66.333	103.667	16.333	104	38	84.25	42.667	93.667	69.333	106	82.75	100.75	51.333	88.667	20.5	96	44	96
					1.2669	0.8617		0.27692	0.130303										3.125	0.284		13	95.667	37	66.75	10.25	91.25	67	79.75	18	92.667	67	106.667	16	105.667	38	86	40.333	98	69	109.667	82.5	103	51	88.333	20.25	101	44.75	101
					0.8464	0.7324		0.0575553	0.845036										2.4	1.934		12.333	99.667	36.75	64.75	8.25	94.75	68	84.5	18.333	96	67.333	109.667	16	112	38.75	91.25	39.333	103.333	69	112.667	82.5	103.75	52.333	87.667	20.25	105	44.5	105.5
					0.9234	0.8683		0.0841764	0.599421										1.4872	1.234		12.667	102	36.75	63.75	6.75	101.5	69.75	86.5	17.667	103	67.667	112.667			40.25	95	39.333	105.333	70	115.333			54	83.333	19.5	107.25	46	108
					0.9555	1.2053		0.177276	1.24082										1.948	0.367								71	88.75	15.667	104.667	68	117.333			42	99.5	38	109.667					54.333	82.333	19.5	109
					1.079	0.9804		0.433929	0.00899506										1.3918	0.4								73.25	92.75							42.25	101.75	37.333	114.333					56	79
					0.7423	1.1613		0.272876	0.509595										0.914	2								74.75	96.25							43	104.5							56.333	75
					0.808	0.8065		0.621707	0.443382										1.9166	0.5								76.75	101							43.75	109.75
					0.7004	0.8857		0.829178	0.453251										1.625	1.468																45	112
					0.7474	0.8065		1.23638	1.25419										2.125	1.233																45	112.5
					0.9234	1.1556		0.184262	0.263106										1.55
					1.1586	0.8617		0.550675	0.881391										0.5
					0.9824	1.0024		0.992341	0.197142										0.35
					1.0945	0.9146		0.622411	0.0540587										1.983
					1.1507	1.1507		1.33414	0.354522										1.6756
					1.0157	1.1343		0.820035	0.51916										2.694
					0.9813	1.0877		0.652652	0.861122										3.2398
					1.2498	1.4429		0.961396	0.325584										0.7897
					0.8318	1.0296		0.191998	0.793025										2.7
					1.0589	0.8373		1.14144	0.113166										2.333
					0.9279	0.6916		0.317887	0.989434										2.583
					0.8683	0.9146		0.671641	0.58972										1.5
					0.8687	0.8853		0.872078	1.72126										2.617
					0.9197	0.8468		1.40772	1.82199										1.183
					1.2729	1.0916		0.981255	2.1706
					1.5876	0.6651		0.890518	1.90831
					0.9917	0.9663		0.00388873	0.286917
					0.954	0.7382		1.04996	1.01234
					1.2388	0.9623		0.535348	0.133361
					1.1896	0.9279		1.2405	0.356369
					0.8857	0.9994		0.274803	0.635681
					0.8871	1.2212		0.185363	0.485968
					0.9134	0.761		1.11606	0.0962061
					1.0266	1.4767		1.09614	0.471557
					0.8617	1.0565		0.250769	0.683451
					1.256	0.8715		0.0256224	0.4845
					0.7965	0.9018		0.335075	0.836633
					0.8056	0.8959		0.76735	0.706401
					0.84	0.8912		0.10282	0.216831
					1.0804	0.8932		0.661554	0.341325
					0.9699	1.2305		0.330116	0.707202
					1.2186	0.9291		0.368136	1.1833
					0.9994	0.8153		0.607995	2.25704
					1.0916	0.8392		1.53255	1.17449
					1.0028	0.9115		0.516202	0.285149
					1.1069	0.8009		0.109232	1.24841
					1.7537	0.8754		0.239542	0.736958
					0.9975	0.8864		0.333662	0.148779
					0.9398	1.1776		0.0505067	0.502113
					0.7672	0.8871		0.805323	0.0216099
					0.9361	0.8667		1.69695	0.22215
					0.6651	1.0774		1.97851	2.11691
					0.8939	0.9752		0.634714	0.0518637
					0.8253	1.1155		3.2999	0.177201
					0.8253	0.7481		0.157618	2.09702
					0.8212	0.8334		1.46072	2.70988
					0.5921	0.7055		0.455356	0.603348
					0.8643	0.6218		1.36342	0.0769312
					0.7551	0.7082		1.05706	0.387249
					0.8363	0.6897		0.120633	0.938734
					0.8607	0.7689		0.951011	0.798702
					1.4538	0.7844		0.839525	1.09
					0.9002	0.8509		0.226551	0.0700161
					0.7928	0.6907		0.103665	0.1141
					1.1185	0.8166		0.325331	1.23695
					1.0426	0.6643		0.0512146	2.23533
					1.0174	0.911		0.272173	0.456565
					0.6485	0.8392		0.0610689	0.497897
					0.7415	1.4293		0.0352534	0.414847
					1.1636	0.9442		1.29966	0.415253
					0.9167	0.9746		0.473284	0.705818
					1.3646	1.2967		0.911453	0.539862
					0.9151	1.0564		0.435532	0.996159
					0.9209	0.9167		0.588204	0.871182
					1.1288	0.9683		0.279112	0.456862
					1.0574	1.1819		0.649412	0.663252
					0.9214	0.9781		0.729912	0.996659
					1.1029	1.412		0.269397	0.706262
					1.0791	1.0775		0.116447	0.704764
					1.2042	1.1623		0.297246	0.331291
					1.0584	1.0399		0.386152	0.581586
					1.1029	0.9442		0.766959	0.912364
					0.9008	0.954		0.390232	0.332536
					1.0037	1.1623		0.135751	0.0825644
					0.9188	0.9824		0.272206	1.36996
					1.1014	1.0589		1.42996	0.746564
					0.9994	0.8978		0.837999	0.124217
					1.0375	0.9247		0.329601	1.728
					0.8924	0.9197		1.00371	0.524249
					1.4202	0.9813		0.0413584	0.68249
					0.958	1.0593		1.03368	0.106129
					1.3988	1.8505		0.138143	0.936383
					1.1829	1.2575		0.931126	0.484519
					1.1429	0.9062		0.400923	0.756644
					1.3721	1.1662		1.1676	0.137151
					0.6643	0.8099		0.034184	0.746032
					1.1298	1.4139		1.00976	1.87168
					0.6604	1.0021		1.01384	1.70051
					0.7901	0.8665		0.0478411	0.368458
					0.8081	1.0203		0.360532	1.21041
					0.8116	0.8857		0.851765	0.0787803
					0.783	0.8427		0.432638	0.446013
					1.0501	0.8486		0.0286771	0.762087
					1.1742	0.6697		0.79579	0.768346
					0.8092	0.7139		0.625657	1.01407
					1.0084	0.7053		0.12105	0.719907
					1.0871	0.6651		1.48859	0.257158
					0.9699	0.5321		1.06588	0.652886
					1.2917	0.6645		0.267607	0.265378
					0.91	0.6476		1.01983	1.1417
					0.7717	0.6124		0.592568	0.116223
					1.2434	0.7526		0.906362	0.615671
					0.8042	0.7526		0.346607	0.0513921
					0.7551	0.7304		0.353067	0.24869
					0.9875	0.8643		0.745081	1.43854
					1.2053	0.798		0.179596	0.73662
					1.0981	0.6872		0.107711	1.15898
					0.9679	0.7551		0.111872	0.557486
					1.0633	1.0589		0.178094	0.605777
					0.8529	0.7746		0.181445	0.984424
					0.996	0.7444		0.825865	0.551431
					0.8727	0.5972		0.0992748	0.0590028
					1.0118	0.5285		0.0426454	0.710703
					1.0376	0.7444		0.826461	0.345924
					1.1288	0.7198		0.0361323	0.345924
					1.0384	0.6453		0.0921636	1.78913
					1.156	0.7835		0.649465	1.03027
					0.8304	0.8212		1.10426	0.0304242
					0.7835			0.508732	0.583995
					1.0206			0.512005	3.68025
					1.024			1.05425	0.924777
					0.8643			0.187338	0.732854
					1.1152			0.521955	1.72478
					1.2201			1.05608	0.779216
					1.2279			0.471946	0.104211
					1.1288			0.650251	1.30506
					0.9679			0.300055	0.0765933
					0.7596			0.840469	0.735776
					0.6872			0.906188	0.717495
					0.8468			0.627603	1.31796
					0.9789			0.160108	0.577919
					1.0804			0.169665	0.825846
					1.0743			1.11709	0.424465
					1.2599			0.130031	0.0636498
					0.9197			0.904565	0.0278885
					0.9683			0.360743	0.00587126
					0.7596			0.727501	0.484246
					1.0511			0.0169606	0.776652
					1.0643			1.54618	0.538943
					1.2084			0.365434	0.404932
					0.9481			2.97893	0.857436
					0.9411			1.83379	1.27977
					0.9321			1.30224	0.32705
					1.238			0.144706	0.550546
					0.9554			0.345948	0.0941265
					0.9574			1.19145	0.564904
					0.7217			0.285443	0.10921
					0.8747			0.670244	1.36128
					0.9743			0.738808	0.606238
					0.8754			0.480309	0.410589
					0.6435			1.25159	0.15359
					0.6784			0.366637	0.0552155
					1.0426			0.828422	0.290243
					0.9837			0.842376	1.13596
					1.3988			1.29382	1.26085
								0.289113	0.351818
								1.12983	0.17562
								0.591471	0.393302
								0.157601	0.124018
								0.319349	0.0235605
								1.57828	1.16675
								0.238676	0.992722
								0.100741	0.383039
								0.0204694	1.23266
								0.693417	0.150036
								0.647796	0.565886
								1.23606	1.39224
								0.529127	0.905852
								0.704789	0.448951
								1.08394	0.151337
								0.717766	0.617922
								0.0387982	0.227222
								0.685475	0.595568
								0.480158	0.637632
								0.948139	0.870579
								0.17105	1.74087
								1.14354	1.70141
								0.765336	0.887695
								1.4821	1.10527
								0.379765	1.41509
								0.574462	1.43366
								0.356119	0.298219
								1.88014	0.715958
								0.997981	1.31298
								0.273425	0.0838378
								0.429466	0.456902
								0.753442	0.00725241
								0.537505	0.385828
								0.339693	0.525655
								0.567099
								0.0197757
								0.0686332
								0.220247
								0.0466602
								0.114259
								0.0093062
								0.177206
								0.457813
								0.393704
								0.037354
								0.674053
								0.383622
								0.357384
								0.047048
								0.0937083
								0.0632046
								0.581896
								0.100559
[truncated: 7 more columns]

## Sheet: Suppl. Figure 4
Suppl. Figure 4D		opto			ctrl		Suppl. Figure 4D		opto HeLa		Suppl. Figure 4F		opto			ctrl			opto			ctrl		Suppl. Figure 4I	Untreated	PRC1 siRNA	Suppl. Figure 4L		opto			ctrl		Untreated		PRC1 siRNA		opto		ctrl		Untreated		PRC1 siRNA		Suppl. Figure 4M	opto HeLa		opto HeLa
	t=0	t=20	t=30	t=0	t=20	t=30		t=0	t=20	t=30		t=0	t=20	t=30	t=0	t=20	t=30	t=0	t=20	t=30	t=0	t=20	t=30		Bridge tubulin int. (a.u.)	Bridge tubulin int. (a.u.)		t=0	t=20	t=30	t=0	t=20	t=30	t=0	t=20	t=0	t=20	t=0	t=20	t=0	t=20	t=0	t=20	t=0	t=20		t=0	t=20	t=0
n (measurement)	22	19	11	19	10	8	n (measurement)	9	9	8	n (measurement)	22	19	11	19	10	8	22	19	11	19	10	8		mean	mean	n (measurement)	40	39	26	40	40	26	20	16	52	28	20	20	20	20	10	8	26	14	n (measurement)	32	32	16
	Bridge int. (a.u.)	Bridge int. (a.u.)	Bridge int. (a.u.)	Bridge int. (a.u.)	Bridge int. (a.u.)	Bridge int. (a.u.)		PRC1 int. (a.u.)	PRC1 int. (a.u.)	PRC1 int. (a.u.)		Bridge width (µm)	Bridge width (µm)	Bridge width (µm)	Bridge width (µm)	Bridge width (µm)	Bridge width (µm)	Kfiber width (µm)	Kfiber width (µm)	Kfiber width (µm)	Kfiber width (µm)	Kfiber width (µm)	Kfiber width (µm)		206.816	110.456		Curvature (µm-1)	Curvature (µm-1)	Curvature (µm-1)	Curvature (µm-1)	Curvature (µm-1)	Curvature (µm-1)	Curvature (µm-1)	Curvature (µm-1)	Curvature (µm-1)	Curvature (µm-1)	theta (º)	theta (º)	theta (º)	theta (º)	theta (º)	theta (º)	theta (º)	theta (º)		Curvature (µm-1)	Curvature (µm-1)	theta (º)
	516.442	32.7612	77.1501	269.764	178.732	306.829		24.578	9.198	15.974		1.04101	0.24024	0.32032	0.80079	0.56055	1.12109	1.52148	0.88086	0.88086	0.64063	1.04101	1.28125		sd	sd		0.118654	0.129983	0.16288	0.132941	0.0970147	0.0829225	0.0967074	0.136206	0.12579	0.114172	146.493	112.112	138.681	144.646	147.888	140.46	121.995	116.987		0.158854	0.0956268	152.282
	504.671	78.9897	74.4254	624.593	142.102	404.132		18.604	5.463	13.172		0.7207	0.40039	0.64062	0.96094	0.560547	0.7207	1.04101	1.04101	1.04102	1.12109	0.800781	0.80078		128.929	79.3965		0.112976	0.0430299	0.191249	0.118507	0.165968	0.144332	0.121899	0.11652	0.0650978	0.0646798	149.889	141.723	147.51	147.554	144.001	138.988	134.853	125.684		0.129865	0.202418	134.03
	129.782	120.756	207.325	190.44	63.6581	115.651		125.694	0.605	52.314		0.56055	0.7207	1.28125	0.80078	0.56055	0.64062	0.7207	0.64062	1.36133	0.88086	0.720704	0.88086		sem	sem		0.218757	0.124153	0.171735	0.165935	0.130425	0.121537	0.147224	0.0936487	0.15262	0.0926849	148.604	110.15	140.262	131.845	148.615	133.912	169.825	138.931		0.198866	0.169897	144.164
	655.314	162.954	317.962	250.015	415.335	77.4577		176.048	0.05	59.745		0.88086	1.04102	0.88086	0.48047	0.88086	0.48047	1.12109	1.4414	0.80078	0.80078	1.20117	0.7207		30.4078	15.571		0.0976147	0.0317033	0.151531	0.140124	0.124135	0.145299	0.136006	0.0687234	0.0970547	0.121761	137.486	140.37	148.025	137.871	154.053	140.506	132.528	146.068		0.22428	0.130504	129.075
	181.648	202.982	45.0972	651.508	45.0216	44.7272		54.226	27.065	91.025		0.72071	0.88086	0.48047	1.36133	0.64062	0.56055	0.80078	0.88086	0.96094	1.52148	0.7207	0.80078		Untreated	PRC1 siRNA		0.147134	0.123861	0.158815	0.101564	0.0651807	0.139029	0.150117	0.162159	0.0647412	0.131095	131.371	104.183	126.673	146.32	150.32	150.918	133.667	146.42		0.201829	0.074476	145.427
	151.346	279.721	16.6773	190.013	151.879	202.62		185.622	16.033	26.635		0.88086	0.7207	0.4004	0.7207	0.7207	0.88086	0.80078	1.36133	0.56055	0.80078	0.88086	1.36132		No. Microtubules	No. Microtubules		0.133702	0.0581283	0.130317	0.157398	0.116494	0.137964	0.160377	0.201259	0.0926452	0.139611	132.051	149.159	150.211	143.313	148.266	151.995	140.562	133.276		0.238551	0.123741	154.829
	230.993	0	207.313	584.88	572.246	429.027		44.616	13.646	50.757		0.72071	0	0.88086	0.96094	1.04102	0.7207	0.7207	1.04102	0.88086	0.96093	1.36133	1.12109		14	7.47712		0.156969	0.0468159	0.0616306	0.19981	0.139345	0.172639	0.154887	0.105681	0.125641	0.108859	142.627	120.737	160.668	145.62	145.903	131.765	138.103	103.429		0.225488	0.179345	154.406
	164.087	75.4322	324.986	529.35	554.268	114.331		67.087	20.004	23.853		0.88086	0.80079	0.88086	0.80078	1.12109	1.04101	1.4414	0.96094	0.88086	0.96094	1.04101	0.88086		sem	sem		0.0622124	0.040564	0.102048	0.137059	0.094502	0.0904638	0.0771416	0.129466	0.0858573	0.104762	114.698	125.556	154.354	148.193	125.267	133.554	144.646	130.945		0.223132	0.205166	148.323
	720.982	133.004	96.3855	110.99	0			33.115	14.045			1.20117	0.80079	0.48047	0.64063	0		1.20117	1.1211	0.800782	0.80078	0.7207			2.0584	1.05405		0.118925	0.0455378	0.0709892	0.168727	0.106604	0.230075	0.123818	0.13785	0.0517861	0.0863997	136.686	102.793	153.507	139.206	133.416		144.427	140.121		0.15445	0.174344	142.087
	314.521	146.289	88.0159	73.2158	334.69							0.96094	0.88086	0.48047	0.32031	0.88086		1.52148	0.96094	0.64062	0.7207	1.12109			n	n		0.0979675	0.143408	0.21161	0.137438	0.0922109	0.115503	0.128347	0.142668	0.0737132	0.176567	134.145	114.412	145.569	127.335	153.092		141.046	154.591		0.268359	0.147966	159.702
	40.0872	138.892	67.19	41.9068								0.96094	0.88086	0.56055	0.32032			1.20117	0.80079	0.72071	0.96094				18	26		0.140416	0.0893402	0.130118	0.111949	0.127075	0.161386	0.198768	0.174777	0.119467	0.123365	149.584	154.207	137.555	143.092			144.724	132.603		0.232692	0.172293	154.417
	0	77.5103		94.8829								0	0.56055		0.48047			0.56055	1.36132		0.80078							0.176739	0.0841266	0.105079	0.100907	0.151353	0.0669294	0.113906	0.160775	0.113856	0.0683314	167.842	124.237	129.521	139.327			131.383	134.139		0.184551	0.132339	141.23
	130.04	82.529		74.5485								0.56054	0.56054		0.7207			0.64062	2.00195		0.88086							0.151668	0.0996542	0.138457	0.116777	0.146578	0.0975491	0.159412	0.147892	0.0671242	0.0821193	144.73	129.896	133.009	140.126			121.814	138.34		0.124851	0.160683	122.115
	295.648	77.6729		66.5628								0.7207	0.64063		0.48047			0.72071	1.04101		0.80078							0.108668	0.0868326	0.170586	0.174049	0.117958	0.164127	0.177815	0.164868	0.114309	0.0857987	134.045	114.045	155.478	140.114			121.482	144.85		0.290405	0.156088	157.847
	23.3785	25.0068		331.222								0.48047	0.40039		0.7207			0.64063	1.12109		1.20117							0.103593	0.0708095	0.151979	0.156026	0.134885	0.0939152	0.128134	0.113056	0.118102	0.105566	134.275	129.026	164.92	146.708			136.901			0.304502	0.186489	158.158
	36.1368	207.147		365.26								0.56055	0.56055		0.88086			1.28125	0.72071		0.88086							0.151291	0.117213	0.165723	0.138115	0.105256	0.121854	0.164457	0.108613	0.0769443	0.0810482	138.939	125.413	132.39	130.849			135.976			0.169754	0.21905	138.083
	259.165	23.0426		126.766								0.80078	0.24024		0.7207			1.04101	0.640625		0.88086							0.162568	0.0470507	0.13743	0.12234	0.187113	0.0950814	0.158401		0.111266	0.0954346	147.185	137.972	139.399	136.462			161.138			0.204852	0.200452
	262.594	122.841		177.706								0.64063	0.56055		0.80078			0.96094	0.80079		1.12109							0.0950256	0.0485615	0.108274	0.100601	0.111129	0.120936	0.0996451		0.10935	0.10388	139.272	135.643	140.36	144.243			130.05			0.190236	0.144992
	281.961	0		208.191								0.48047	0		0.7207			0.96094	0.800781		0.96094							0.151951	0.0805138	0.155778	0.131478	0.0989344	0.202519	0.102572		0.127452	0.168839	155.86	115.816	140.768	126.781			156.317			0.196704	0.101548
	278.011											0.72071						0.96094										0.173991	0.0618736	0.113392	0.0807217	0.120077	0.121485	0.134399		0.0895321	0.0861539	159.53	115.634	142.761	142.232			126.29			0.138129	0.131836
	54.4052											0.64062						0.80078										0.118291	0.0853068	0.130277	0.13119	0.165504	0.123577			0.125762	0.0771186							115.005			0.175462	0.145891
	364.3											0.64062						0.96094										0.124761	0.0710625	0.0835493	0.137514	0.0998516	0.131933			0.189613	0.0635822							139.128			0.223696	0.0968502
																												0.128626	0.101257	0.183245	0.127099	0.102569	0.0803879			0.151065	0.11224							140.88			0.202012	0.133336
																												0.176236	0.0526612	0.146783	0.14799	0.128841	0.102276			0.122276	0.100666							136.923			0.178047	0.127949
																												0.146874	0.143516	0.10093	0.0847771	0.193917	0.0701886			0.105621	0.117643							131.587			0.158374	0.0900529
																												0.150141	0.0822222	0.143478	0.152603	0.120626	0.0928242			0.0932626	0.0970178							141.522			0.201219	0.105755
																												0.114209	0.0937044		0.19795	0.129307				0.101118	0.0868585										0.245791	0.14551
																												0.1442	0.0474974		0.19675	0.151114				0.124287	0.0924641										0.192146	0.154718
																												0.122524	0.0769079		0.160609	0.189032				0.158397											0.182527	0.13863
																												0.11756	0.132393		0.144499	0.167686				0.0763065											0.280315	0.156088
																												0.101573	0.0969646		0.140135	0.126059				0.0504499											0.272462	0.186489
																												0.151763	0.10296		0.156702	0.142738				0.0963855											0.168491	0.21905
																												0.123633	0.0493749		0.103437	0.155059				0.0553187
																												0.13975	0.115316		0.171029	0.156898				0.0996233
																												0.111483	0.119917		0.21748	0.143075				0.0941033
																												0.144886	0.0599232		0.143904	0.113316				0.0735041
																												0.133179	0.0411793		0.180885	0.0793127				0.0934168
																												0.129943	0.0718271		0.118595	0.114521				0.171179
																												0.175442	0.0435518		0.0850965	0.0713634				0.0944425
																												0.114969			0.106455	0.122235				0.0493154
																																				0.115703
																																				0.104786
																																				0.129628
																																				0.103325
																																				0.17918
																																				0.154053
																																				0.0919992
																																				0.176476
																																				0.145636
																																				0.100183
																																				0.131279
																																				0.094454
[truncated: 23 more columns]

## Sheet: Suppl. Figure 5
Suppl. Figure 4C	Untreated HeLa	PRC1 siRNA HeLa	Untreated HeLa	PRC1 siRNA HeLa	Suppl. Figure 4D	Untreated	PRC1 siRNA	Suppl. Figure 4E	endogenous	endogenous+GFP	Suppl. Figure 4F		opto			opto
n (measurement)	43	43	38	16	N (cells)	12	21	N (cells)	11	11		t=0	t=20	t=30	t=0	t=20	t=30
	Norm. bridge Kif4A int.	Norm. bridge Kif4A int.	Norm. bridge Kif18A int.	Norm. bridge Kif18A int.		PRC1 int. (a.u.)	PRC1 int. (a.u.)		MKLP1 int. (a.u.)	MKLP1 int. (a.u.)	N (cells)	6	6	5	6	6	5
	0.892702	0.223336	0.500368	0.310662		92.1364	2.329		2777.77	3046.59		MKLP1 int. (a.u.)	MKLP1 int. (a.u.)	MKLP1 int. (a.u.)	PRC1 int. (a.u.)	PRC1 int. (a.u.)	PRC1 int. (a.u.)
	0.554002	0.0482021	1.31993	0.0947059		107.637	3.7896		2651.64	3070.56		32.781	12.688	25.765	78.727	4.463	83.215
	0.30528	0.220123	0.986765	0.131471		92.8272	22.5342		2907.94	2964.87		19.623	2.478	6.112	96.364	5.656	81.067
	0.669366	0	0.726103	1.04838		49.2092	7.696		2935.09	3213.98		18.834	0.099	8.916	25.644	4.038	46.969
	0.776053	0.0835502	1.04779	1.68485		58.7834	11.8298		3286	3144.07		24.072	9.617	-	82.866	9.07	-
	0.755166	0.220123	0.512426	0.318897		56.7064	34.2818		2942.22	3595.86		26.417	9.663	13.684	73.477	6.076	31.637
	0.4772	0.228156	0.413603	0.299338		123.066	25.6836		3109.77	3132.94		35.629	8.365	21.742	87.787	16.198	48.774
	0.0877278	0.118898	2.95846	0.172941		39.3938	3.2038		3055.82	3275.47
	0.36987	0	0.630074	0.117794		89.362	26.2986		2976.84	3341.27
	0	0.294033	1.16779	1.15044		156.171	27.5284		3152.98	3066.11
	0.179954	0.112471	1.37868	0.736838		156.773	29.2794		3182.6	3477.57
	0.332594	0.191202	1.0961	0.72875		59.6242	21.4626
	1.71149	0.215303	1.43044	0.708088			1.9494
	1.27253	0.329381	0.932868	0.291985			15.9062
	1.73913	0.332594	1.45449	0.470074			3.9204
	1.29182	0.332594	1.79684	0.169044			32.4144
	0.595777	0.417751	0.803015				24.6866
	1.841	0.686076	0.747868				31.0806
	1.94576	0.817828	0.395294				21.9008
	1.52286	0.718211	0.507941				7.7608
	1.45185	0.316527	0.361985				34.047
	1.15299	0.0980109	0.31375
	1.59227	0.488448	0.330956
	1.90719	0.628234	1.75434
	0.938333	0.490054	1.43154
	1.5264	0	0.402132
	2.4085	0.0237797	0.537647
	1.74491	0.13593	0.180809
	2.08233	0.69411	0.184265
	1.96022	0.512549	2.0875
	0.612166	0.69411	1.94279
	0.186381	0.271538	1.39816
	0.0562357	0.249365	1.61191
	0.800154	0	1.51882
	0.432212	0.268646	0.235809
	0.374369	0.334201	1.12368
	0.324561	0.776053	1.10765
	0.918731	0.779267	0.667574
	0.647514	0.258684
	0.510299	0
	1.68611	1.08133
	0.986857	0.612166
	1.37922	0.567178

[truncated: 1 more sheets: Suppl. Figure 6]
